# Supplementary material for: Protocol of the randomised placebo controlled pilot trial of the management of acute sciatica (SCIATICA): a feasibility study
Source: PubMed Central journal article supplement — BMJ Open. 2018 Jul 5;8(7):e020435. doi: 10.1136/bmjopen-2017-020435 (PMC6042624; doi:10.1136/bmjopen-2017-020435), 2018-07-05
Supplement: bmjopen-2017-020435.draft_revisions.pdf [file bmjopen-2017-020435.draft_revisions.pdf]

# BMJ Open

BMJ Open is committed to open peer review. As part of this commitment we make the peer review history of every article we publish publicly available.

When an article is published we post the peer reviewers' comments and the authors' responses online. We also post the versions of the paper that were used during peer review. These are the versions that the peer review comments apply to.

The versions of the paper that follow are the versions that were submitted during the peer review process. They are not the versions of record or the final published versions. They should not be cited or distributed as the published version of this manuscript.

BMJ Open is an open access journal and the full, final, typeset and author-corrected version of record of the manuscript is available on our site with no access controls, subscription charges or pay-per-view fees (<http://bmjopen.bmj.com>).

If you have any questions on BMJ Open's open peer review process please email [info.bmjopen@bmj.com](mailto:info.bmjopen@bmj.com)

# BMJ Open

## A Comparative Effectiveness Randomised Placebo Controlled Pilot Trial of the Management of Acute Lumbar Radicular Pain (SCIATICA)

|                               |                                                                                                                                                                                                                                                                                                                                                                                                                                              |
|-------------------------------|----------------------------------------------------------------------------------------------------------------------------------------------------------------------------------------------------------------------------------------------------------------------------------------------------------------------------------------------------------------------------------------------------------------------------------------------|
| Journal:                      | <i>BMJ Open</i>                                                                                                                                                                                                                                                                                                                                                                                                                              |
| Manuscript ID                 | bmjopen-2017-020435                                                                                                                                                                                                                                                                                                                                                                                                                          |
| Article Type:                 | Protocol                                                                                                                                                                                                                                                                                                                                                                                                                                     |
| Date Submitted by the Author: | 03-Nov-2017                                                                                                                                                                                                                                                                                                                                                                                                                                  |
| Complete List of Authors:     | Lassere, Marissa; St George Hospital, Rheumatology; University of New South Wales, School of Public Health and Community Medicine<br>Johnson, Kent; University of New South Wales, St George Clinical School, St George Hospital<br>Thom, Jeanette; University of New South Wales, School of Medical Sciences<br>Pickard, Grant; St George Hospital, Medical Assessment Unit<br>Smerdely, Peter; St George Hospital, Department of Aged Care |
| Keywords:                     | sciatica, Neurosurgery < SURGERY, Adult orthopaedics < ORTHOPAEDIC & TRAUMA SURGERY, epidural steroid, radiculopathy, radicular pain                                                                                                                                                                                                                                                                                                         |
|                               |                                                                                                                                                                                                                                                                                                                                                                                                                                              |

SCHOLARONE™  
Manuscripts

**Title Page****A Comparative Effectiveness Randomised Placebo Controlled Pilot Trial of the Management of Acute Lumbar Radicular Pain (SCIATICA)****Corresponding author**

Professor Marissa Nichole Lassere  
Rheumatology Department,  
St George Hospital  
Gray Street,  
Kogarah, 2217  
Australia  
Email: m.lassere@unsw.edu.au  
Telephone: +61291132139

**Co-authors**

Dr Kent Robert Johnson  
St George Clinical School,  
University of NSW  
Kogarah  
Australia

Dr Jeanette Thom  
School of Medical Sciences  
University of NSW  
Kensington  
Australia

Dr Grant Pickard  
Medical Assessment Unit,  
St George Hospital  
Kogarah  
Australia

A/Professor Peter Smerdely  
Department of Aged Care, St George Hospital  
Kogarah  
Australia

**Word Count 7461****Keywords**

Sciatica, lumbar-sacral radicular pain, lumbar-sacral radiculopathy, epidural steroids, randomised controlled trial, Oswestry Disability Index, comparative effectiveness

## ABSTRACT

**Introduction:** Acute sciatica (symptom duration less than 4 weeks), a major cause of pain and disability, is a common presentation to medical practices and hospitals. Peri-neural steroid injection is often used with the hope of reducing pain and improving function in sciatic. More recently, there has been interest in using systemic corticosteroids in acute sciatica. However, there is limited evidence to inform effectiveness of perineural steroid in subacute and chronic sciatica and there is no evidence in acute sciatica, even though the practice is widespread. There is also limited evidence for the use of systemic corticosteroids in acute sciatica. Furthermore, the comparative effectiveness of perineural steroid versus systemic steroids has never been directly studied.

**Methods and Analysis:** SCIATICA is a single centre study of patients with acute sciatica designed to evaluate the feasibility of undertaking a 4-arm randomised controlled comparative effectiveness study of (i) CT-guided peri-neural steroid injection and (ii) systemic steroids (tapering dose over 15 days of oral dexamethasone) in a blinded randomised sham and placebo controlled trial. SCIATICA is designed to evaluate head-to-head, route versus pharmacology of corticosteroid intervention by comparing epidural steroid with systemic steroids, and epidural steroid with epidural saline, and includes additional full blinding with oral placebo and sham injection. The primary outcome measure is the Oswestry Disability Index (ODI) 3weeks post allocation of the intervention. Secondary outcome is the ODI at 48 weeks. Other outcomes include numerical rating scale for leg pain, Pain Detect Questionnaire, quality of life, medication use, need for rescue procedures or surgery, and adverse events. Results of outcomes from this RCT will be used to determine the sample size and power calculations for a full-scale study.

**Ethics and dissemination:** The study has been approved by South Eastern Sydney Local Health District Human Research Ethics Committee (HREC/15/331/POHW/586). ClinicalTrials.Gov NCT03240783

## STRENGTHS AND LIMITATION OF THIS STUDY

- This 4-arm trial evaluates the feasibility of undertaking a head-to-head route versus pharmacology of intervention randomised controlled trial by comparing epidural steroid with systemic steroids, and epidural steroid with epidural saline, AND includes additional full blinding with oral placebo and sham injection. Such a trial directly provides risk versus benefit of interventions of interest.
- Power calculations for a 4-arm comparative effectiveness fully blinded RCT will be established.
- Evaluates feasibility of recruiting and protocol adherence of patients from different settings: public hospital in-patients, emergency department presentation and general practitioner visits, in order to maximise generalisability of results.
- Evaluates the challenge of recruiting patients to a RCT where there often is an expectation of treatment benefit by health care professionals because of extrapolation of results from case series or RCTs with different inclusion criteria, but where there is no direct RCT evidence of benefit and risk in this patient population.
- Evaluates the challenge of recruiting patients to a RCT where there often is an expectation of treatment benefit by patients, family and friends by word-of-mouth or by searching the internet.
- Evaluates the adequacy and limitations of outcome measures in the acute sciatica, where pain, sensory and motor neurological symptoms all cause distress and disability, and where pain caused by nerve root irritation may often progress to loss of pain but is replaced by sensory loss or weakness from nerve root loss of conduction.

## INTRODUCTION

The simple definition of sciatica is pain in the buttock and leg. The anatomic pathology is usually caused by lumbosacral disc herniation and degenerative lumbosacral spondylosis involving the L2/3 to L5/S1 intervertebral discs and foramina.[1] Sciatica can be associated with numbness, paraesthesia and weakness in the leg. The terms radicular pain and radiculopathy describe this neurological component of the pathology.[2] Sciatica and radicular pain is thought to arise from ectopic activation of nociceptive afferent fibres in a spinal nerve or its roots from ischaemia or inflammation.[3] Radiculopathy indicates that there is conduction block of the spinal nerve or its roots from either mechanical compression or ischaemia from compromise of blood supply. Nonetheless, the terms are still used interchangeably and inconsistently in the randomised controlled trial (RCT) literature[4],[5], and in one recent review[5] 77% of all studies that used the term sciatica included participants with radicular pain and radiculopathy. This protocol uses the term sciatica to encompass sciatica, radicular pain and radiculopathy from lumbosacral nerve root pathology. The definition of acute sciatica in the RCT and systematic review literature differs. It has been defined as less than 4 weeks, less than 6 weeks and less than 12 weeks duration. Subacute sciatica is usually between 6-12 weeks duration. Chronic sciatica is greater than 12 weeks duration. In this protocol symptoms less than 4 weeks duration are defined as acute.

The prevalence of lumbosacral radiculopathy has been estimated at 3% to 5%[6], whereas referred leg pain is much higher.[4] In a inception cohort of 1,172 patients with acute low back pain presenting to primary care settings in Australia, 25% had leg pain[7]. The majority of participants (72%) with acute sciatica recover completely at by 12 months[7]. In another study, 50% of patients with acute sciatica recovered within 4 weeks. However, 30% had persistent leg pain and disability at 12 months[8].

Patients with acute sciatica are treated with a combination of paracetamol, opiate analgesia, non-steroidal anti-inflammatory drugs (NSAIDs), pregabalin, and physiotherapy although a systematic review of pharmacologic therapy that included NSAIDs, opioid analgesics, antidepressants, anticonvulsants, muscle relaxants, and opioid analgesics, showed no effect or only small effects in acute, subacute and chronic sciatica[9]. Neuropathic symptom modifiers such as pregabalin have also recently been shown to be ineffective[10].

Selective computed tomography fluoroscopic-guided transforaminal epidural injection of steroid with a local anaesthetic, also known as a spinal perineural injection, is increasingly being used in the management of patients with acute sciatica in hospital and community settings. For many medical practitioners this intervention is the expected treatment in patients who do not improve with conservative treatment if the CT or MRI findings support a diagnosis of a spinal nerve root compression that correlates with the clinical symptoms and signs. However, there is no RCT evidence to support the use of spinal perineural steroids in the acute sciatica. RCTs have required participants to have failed 6 weeks of conservative management prior to study recruitment because of the high spontaneous rate recovery. There are no Cochrane or systematic reviews on the management of acute sciatica with perineural steroid procedures[11]. The evidence for the use of spinal perineural injections in the acute setting is an extrapolation of relatively poor evidence in the subacute and chronic setting and the possibility that the procedure itself has a placebo effect.

During the 1970s, failure of conservative management in sciatica and the desire to avoid surgery led to the use of more invasive interventional procedures, such as epidural steroids. There are three approaches for epidural steroids: caudal, interlaminar and transforaminal. Evidence for the superiority of the transforaminal approach, which is the present-day approach, versus the other two is generally indirect[12] as there are few high quality head-to-head studies[13]. The transforaminal approach deposits steroid directly near the ventral epidural space at the affected unilateral nerve

1 root level. It is nowadays executed with CT fluoroscopic guidance, therefore is performed by  
2 interventional radiologists.  
3

4  
5 The first transforaminal approach RCT was published in 2000[14]. Since then five RCTs have been  
6 published[15][16][17][18][19]. These RCTs had low risk of bias from random sequence generation  
7 and participant and personnel blinding. All RCTs except one required a symptom duration of at  
8 least 4 weeks prior to recruitment. All but one RCT required MRI evidence of disc herniation[14].  
9 Two studies excluded patients with evidence of foraminal stenosis[17][19]. Three studies did not  
10 report neurological features[16][18][19]. All studies included an epidural control, but only one  
11 study also included a non-epidural control[17]. Only two studies clearly specified the primary  
12 endpoint[17][18], but these two studies had incomplete follow-up as they did not obtain further data  
13 on patients who failed to achieve a 50% reduction of pain 4 weeks after the last procedure. In  
14 summary, none of the RCTs used CT-guided fluoroscopy as is the current practice. Where epidural  
15 saline was used as an epidural control, speculated mechanisms for effect include washout of  
16 inflammatory cytokines, lysis of inflammatory mediated adhesions and enhanced blood flow to  
17 ischaemic nerves.  
18

19  
20 There have been over 60 reviews of epidural steroids in the last 15 years. Not surprisingly, given  
21 the heterogeneity of patient populations, interventions and study design and conduct differences,  
22 conclusions vary. A recent systematic review and meta-analysis [20] of transforaminal epidural  
23 steroids concludes that they provide “modest analgesic benefit at 3 months ... but have no impact  
24 on disability”. A meta-analysis that included all epidural steroid approaches (caudal, interlaminar  
25 and transforaminal)[12] concluded that the “small size of the treatment effects raises questions  
26 about the clinical utility of this procedure”.  
27

28  
29 Harms have been reported with transforaminal epidural steroid injections[21] including infection  
30 and bleeding. In 2014, the Food and Drug Administration (FDA) issued a letter of warning that  
31 injection of corticosteroids into the epidural space of the spine may result in rare, but serious  
32 adverse events, including "loss of vision, stroke, paralysis, and death." [22]. The risk is greater for  
33 particulate versus non-particulate steroids and in cervical versus lumbosacral epidurals. Recently a  
34 consensus opinion paper was published on safeguards to prevent neurologic complications after  
35 epidural steroid injections[23]. The clinical considerations were based on conventional fluoroscopy  
36 with contrast and not with CT fluoroscopy. RCTs show no difference in efficacy between  
37 particulate and non-particulate steroids[24],[25],[26].  
38

39  
40 Unlike epidural steroids, systemic steroids have been studied in acute as well as subacute sciatica. A  
41 meta-analysis of 7 small of studies of variable quality of IM, IV and oral steroids found steroids  
42 were not superior to placebo and had more adverse events[27]. Adverse events, however, were  
43 clearly related to the very high dose of dexamethasone used in 3 of the 7 studies (120 mg of  
44 dexamethasone in 3 days which is the equivalent of 800mg of oral prednisone). In another  
45 systematic review[9] three studies of acute sciatica using smaller doses of steroid, a significant  
46 effect on short-term overall pain and leg pain was found. A RCT of IM steroid versus IM saline  
47 failed to show a difference in leg pain scores [17]. A blinded RCT reported that IV dexamethasone  
48 (8mg) improved pain scores at 24 hours and reduced ED length of stay compared to placebo. There  
49 was no difference at 6 weeks[28]. No CT/MRI imaging evidence was needed. A recent blinded  
50 RCT of patients with sciatica less than 12 weeks duration of oral prednisone (60mg 5 days, 40mg 5  
51 days and 20mg 5 days) showed an improvement in function at 3 weeks and 52 weeks but no  
52 improvement in pain[29].  
53

54  
55 There is considerable support for perineural steroids for the management of acute sciatica in the  
56 medical community despite limited, direct, high quality research to inform effectiveness of CT-  
57 guided transforaminal epidural steroid in subacute and chronic sciatica and no evidence in the acute  
58 sciatica. Arguably, steroids may be more effective for sciatica when provided in the acute setting,  
59



1 yet this treatment has not been subjected to rigorous evaluation. Other treatments for sciatica that  
2 are occasionally used in the acute setting are single high dose intramuscular or intravenous steroids,  
3 and a tapering course of oral steroids. Given their common use and perceived effectiveness, and the  
4 costs and potential harms associated with their use, there is an identified need to properly evaluate  
5 the use of epidural and systemic steroids in acute sciatica in adequately controlled trial designs with  
6 both a control arm for the route of procedure and a control arm for the pharmacology.  
7  
8  
9

## 10 **METHODS / ANALYSIS**

### 11 **Study Objectives**

#### 12 Primary objective

13 Undertake a pilot study of a sham and placebo parallel group randomised controlled trial of  
14 computed tomography (CT) fluoroscopic guided transforaminal lumbar epidural steroid versus oral  
15 steroid taper in patients with acute sciatica to evaluate the following issues: rate of recruitment,  
16 study conduct including randomisation allocation concealment, preparation of interventions, choice  
17 of procedural corticosteroid and local anaesthetic, blinding, efficient organisation of initial  
18 assessments, diagnostic imaging, and ensuring efficient study processes across hospital inpatient,  
19 emergency room/department presentation and general practice visits, and timeliness of providing  
20 the intervention within the 4 week acute sciatica requirement. Rate of recruitment is important  
21 particularly where there already is an expectation of treatment benefit by health care professionals  
22 because of extrapolation of results from case series or RCTs with different inclusion criteria, but  
23 where there is no direct RCT evidence of benefit and risk in this patient population. Rate of  
24 recruitment is also important because of the challenge of recruiting patients to a RCT where there  
25 already is an expectation of treatment benefit by patients, family and friends by word-of-mouth or  
26 by searching the internet, of the benefit of spinal perineural injections.  
27  
28

#### 29 Secondary objectives

- 30 1. Obtain preliminary results from this RCT which will be used to calculate the sample size and  
31 power calculations for a full-scale study of treatments currently used in the management of acute  
32 lumbosacral radiculopathy of less than 4 weeks duration is the most effective in reducing pain and  
33 disability in the short-term and prevent progression to persistent or recurrent lumbosacral  
34 radiculopathy in the long term.
- 35 2. Evaluate the adequacy of outcome measures in acute sciatica, where pain, sensory and motor  
36 neurological symptoms all cause distress and disability, and where pain caused by nerve root  
37 irritation often progresses to loss of pain and may be replaced by sensory loss or weakness from  
38 nerve root conduction impairment. The importance of describing this multifactorial pathology and  
39 how it impacts the primary endpoint, the Oswestry Disability Index has substantive importance  
40 regarding the optimal primary and secondary endpoint for use in a main RCT. Other outcome  
41 measures will also be evaluated such as confounding by medication use and taper, protocol  
42 compliance and burden, confounding by modification of activities and need and timing of rescue  
43 procedures.
- 44 3. Although this is a feasibility study, for transparency the following are the pre-specified  
45 hypotheses for powering of a full-scale RCT; in patients with acute sciatica, CT/fluoroscopic guided  
46 transforaminal lumbar epidural steroid (spinal perineural injection of steroid) is (a) superior to  
47 sham injection and (b) equivalent to a 15 day tapering dose of oral dexamethasone in reducing  
48 short-term pain and disability (after 3 weeks) as determined by the Oswestry Disability Index.  
49  
50  
51

### 52 **Participants, interventions and outcomes**

53 The study setting is the rheumatology service at a large teaching hospital in Sydney, Australia. The  
54 teaching hospital services a population of about 1 million of Southern Sydney. The eligibility  
55 criteria are as follows:  
56  
57  
58  
59  
60

### Inclusion criteria

- (i) leg pain of any description with clinical findings consistent with single level radiculopathy,
- (ii) minimum symptom duration > 72hrs,
- (iii) maximum symptom duration < 3 weeks to ensure symptom duration at randomisation is < 4 weeks,
- (iv) no previous episode of same level radicular pain in the previous 6 months,
- (v) pain intensity at >30 on the Oswestry Disability Index (ODI),
- (vi) imaging (MRI and/or CT) indicating herniated disc or foraminal stenosis or both, concordant with the level indicated by history and physical examination,
- (vii) age at least 18 years

### Exclusion criteria

- (i) previous transforaminal epidural steroids at any level in the last 12 months,
- (ii) previous oral steroids in the last 12 months,
- (iii) any lumbar surgery at same level, or above or below the level at any time,
- (iv) previous lumbar surgery at any other level to that in (iii) within the last 12 months,
- (v) pregnancy, or lactation/breastfeeding
- (vi) direct indication for neurosurgery (e.g. cauda equina syndrome, or progressive motor loss i.e.  $\leq 3/5$  power),
- (vii) inability to read or understand English
- (viii) any serious medical or psychiatric condition that may interfere with participation or outcome assessment such as: need for uninterrupted anti-coagulation, spinal fracture, active infection or metastatic disease suspected, active cancer, poorly controlled diabetes, or patients with diabetes on any insulin, uncontrolled hypertension (systolic blood pressure >180 or diastolic blood pressure >110 within 30 days of randomization date), active peptic ulcer disease, history of intolerance to steroid therapy, previous or current psychiatric history of bipolar disease, or secondary gain such as anticipated or ongoing legal proceedings, history of substance abuse
- (ix) no other pathology likely to explain condition (e.g Guillain-Barre Syndrome, vasculitis)

Both MRI and CT scan are acceptable for entry criteria. If CT is equivocal regarding pathology or level, then the patient will proceed to MRI, or the patient is not included in the study. Scans are performed without contrast. All potential participants will be reviewed by a study physician (rheumatologist) who will undertake a history and physical general, musculoskeletal and neurological examination to ensure inclusion and exclusion criteria and exclude 'red flags' and alternate diagnoses. Full laboratory examination of efficacy and safety includes FBC, CRP, ESR, coagulation profile, electrolytes, urea, creatinine (EUC), liver function tests (LFTs), fasting blood glucose. Patients who can cease antiplatelet and anticoagulant medications safely will be given instructions on how to do so, or are excluded. The CT and/or MRI images are reported by an experienced radiologist who is unaware of the study, and the results are discussed with the participant and their treating physician. If the report is unclear, the images are reviewed by an independent radiologist at a radiology meeting to clarify imaging pathology. If imaging pathology remains unclear then eligibility is not met. The images are also reviewed by the interventional radiologist prior to the procedure (see Implementation). If the interventional radiologist cannot confirm the specified imaging pathology the procedure is aborted and the principal investigator is contacted.

### Interventions

In the interventions are as follows and also described in Figure 1.



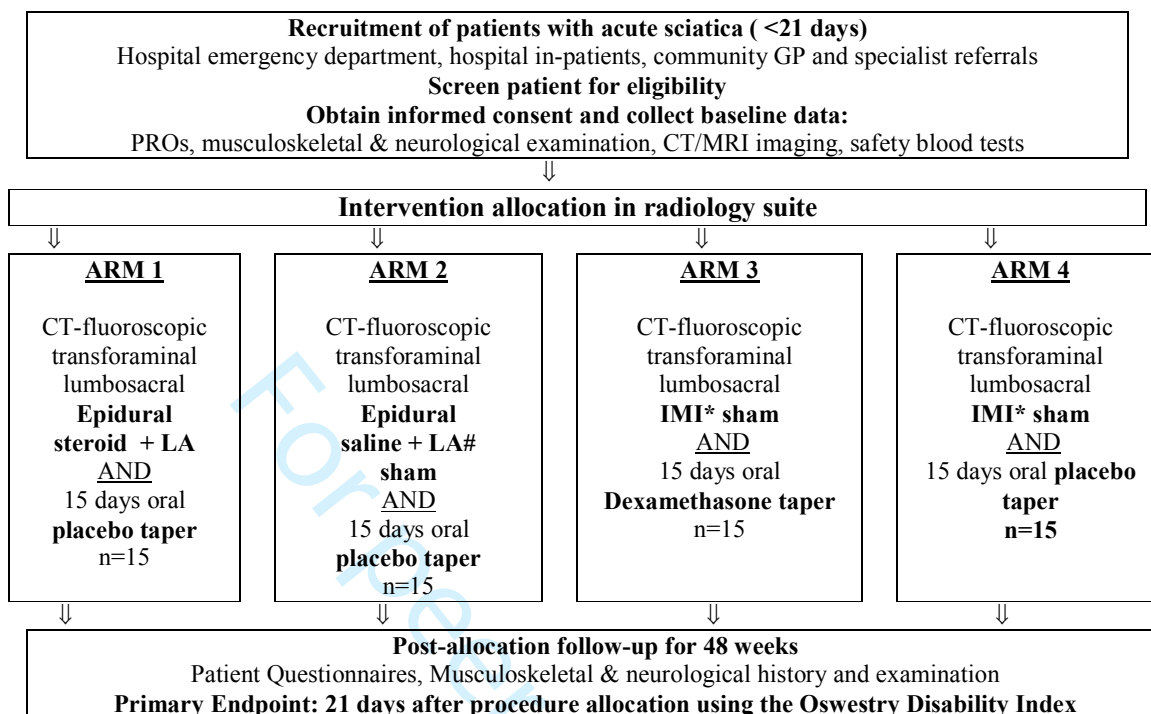

#LA=local anaesthetic \*IMI=intramuscular injection

**Figure 1. Study design and interventions**

**Arm 1.** Selective CT/fluoroscopic guided transforaminal lumbar epidural steroid (1 ml) and local anaesthetic (1ml) injection AND oral placebo capsules (lactose) days 1-15, 8am and 6 pm.

**Arm 2.** Selective CT/fluoroscopic guided transforaminal lumbar epidural normal saline (0.9%) (1 ml) + local anaesthetic (1ml) injection AND oral placebo capsules (lactose) days 1-15, 8am and 6 pm.

**Arm 3.** Sham CT/fluoroscopic guided transforaminal lumbar sham injection which is needle placement down to muscle layer and no injection of any fluid AND oral dexamethasone capsules 15 day taper dosing - days 1-5 4 mg 8am and 6pm, days 6-10 2 mg 8am and 6pm days 11-15 1mg 8am and 6pm.

**Arm 4.** Sham CT/fluoroscopic guided transforaminal lumbar sham injection which is needle placement down to muscle layer and no injection of any fluid AND oral placebo capsules (lactose) days 1-15, 8am and 6 pm.

**Procedural injectable intervention.** In this study participants will receive dexamethasone 4mg (1ml) a non-particulate corticosteroid with the local anaesthetic lignocaine 1% (1ml) except if they are an inpatient at St George Hospital in which case participants will receive celestone chondrose 5.7mg/ml, (betamethasone) a particulate corticosteroid with the local anaesthetic bupivacaine 0.5% (1ml). This is at the direction of two interventional radiology investigators who have differing preferences regarding procedural agents. The interventional radiologist and their preference is known and will be addressed in the hierarchical linear model analysis. The normal saline epidural sham injection is 0.9% normal saline (1ml) and lignocaine 1% (1 ml) unless they are hospital inpatients in which case they will receive bupivacaine 0.5% as the local anaesthetic agent. The saline epidural sham provides the control for the procedure pharmacology. The IMI sham procedure is needle placement down to muscle layer and no injection of any fluid. The intervention is

1 performed by an experienced interventional radiologist. The intervention radiologist is not blind to  
2 the procedure (see section Blinding, for more information).  
3

4 **Oral intervention** The oral steroid is dexamethasone. The 15 day taper dosing is days 1-5 4 mg  
5 8am and 6pm, days 6-10 2 mg 8am and 6pm days 11-15 1mg 8am and 6pm. Dexamethasone has a  
6 longer biological half-life than prednisolone. The placebo is sucrose and lactose. The oral  
7 interventions are over-encapsulated in gelatine capsules packed with sucrose and lactose.  
8 Dexamethasone and placebo capsules have identical appearance and are prepared by a  
9 compounding pharmacist. The capsules are placed in three plastic bottles with clearly labelled  
10 instructions. At each telephone or in-person contact treatment adherence is monitored.  
11  
12

13 **Concomitant management and interventions:** All participants have concomitant therapy as  
14 directed by the treating physician(s) with analgesics, NSAIDS, pregabalin and physical therapies.  
15 All concomitant therapy will be recorded at each visit. Rescue therapy includes perineural injection  
16 of steroid and neurosurgery.  
17

### 18 **Outcomes**

19 A recent publication on core outcomes domains for clinical trials in non-specific low back pain  
20 recommended physical functioning, pain intensity, and health-related quality of life [30].  
21

22 Primary outcome measure.

23  
24 *The Oswestry Disability Index (ODI) version 2.0* [31] is the primary outcome measure. The ODI is  
25 a functional status measure specifically developed for disorders of the spine and has been used in  
26 most RCTs of sciatica[32] and see Table 1. It is a 10-domain 2-page 5 minute questionnaire with  
27 ordered 6-response-item (0-5) scales for each question. The questions address domains of pain,  
28 physical functioning, sleeping, home/work functioning and impact on social life. The scores are  
29 summed, then doubled and the final score is 0-100. The ODI will be administered at Eligibility  
30 Baseline/Randomisation (day 0), day 1- 7, weeks 2, 3, 6, 12, 24, 48. This will be administered at  
31 visits, phone or mail. The primary analysis is the short-term outcome, reduction of disability at 3  
32 weeks on the ODI. The secondary analysis is the long-term outcome, reduction of disability at 48  
33 weeks on the ODI.  
34  
35

36 Secondary outcomes.

37  
38 *Numerical Rating Scale (NRS) for leg pain* is the main secondary outcome. A measure of leg pain is  
39 included in all studies of sciatica. The NRS is a validated [33] 11 point scale. Participants will be  
40 asked to rate their average leg pain over the preceding 24 hours. Zero represents 'no leg pain' and  
41 10 represents 'worst imaginable pain'. Although the Visual Analogue Scale is a more frequently  
42 included measure, unlike the VAS, the NRS can be verbally administered by phone. This will be  
43 administered at Eligibility Baseline/Randomisation (day 0), day 1-7, weeks 2, 3, 6, 12, 24, 48.  
44  
45

46 *Numerical Rating Scale (NRS) for back pain.* The severity of back pain may differ to that of leg  
47 pain so both measures are needed. It is rated as an average over the preceding 24 hours and will be  
48 administered at Eligibility Baseline/Randomisation (day 0), day 1- 7, weeks 2, 3, 6, 12, 24, 48.  
49

50 *Pain DETECT Questionnaire* [34]. At Eligibility Baseline/Randomisation (day 0), day 1- 7, weeks  
51 2, 3, 6, 12, 24, 48.  
52  
53

54 *Short-Form 36 (SF-36) questionnaire* [35] evaluates health related quality of life and will be  
55 administered at Eligibility, Baseline/Randomisation (day 0), day 1, day 7, weeks 3, 6, 12, 24, 48.  
56  
57

1 *Lumbosacral and lower limb musculoskeletal and neurological history and clinical examination at*  
2 Eligibility, Baseline/Randomisation (day 0), day 1, day 7, weeks 3, 6, 12, 24, 48. This includes  
3 inspection of gait, lumbosacral spine and lower limbs for scoliosis, asymmetry, loss of lumbar  
4 lordosis, abnormal gait and stance, weakness, muscle wasting, muscle fasciculation, palpation of  
5 lumbosacral spine for tenderness and rigidity, movement of lumbosacral spine in flexion and  
6 extension, hip, knee and ankle range of movement, straight leg raise and femoral stretch test.  
7 Neurological examination of lower limb includes further inspection, examination for tone (normal,  
8 increased, decreased), clonus (present absent and beats of clonus if present), power (0, 1, 2, 3, 4, 4+  
9 and 5 out of 5) for 12 lower limb movements (hip abduction, adduction, flexion, extension, knee  
10 flexion and extension, ankle dorsiflexion, plantar flexion, inversion and eversion, big toe extension  
11 and flexion), knee and ankle reflexes (increased, normal, decreased absent), plantar reflexes  
12 (normal, up-going, equivocal, no response), and pinprick, light touch, proprioception and vibration  
13 sensory examination.  
14  
15

16  
17 *Work and health utilisation measures* at Eligibility, Baseline/Randomisation (day 0), day 1, day 7,  
18 weeks 3, 6, 12, 24, 48. These will include days missed from paid employment (if applicable)  
19 because of sciatica, use of health services such as doctor, other health-care provider related visits  
20 (acupuncture, chiropractic), injections and neurosurgical procedures.  
21

22 *Demographic and socioeconomic measures* measured at baseline include age, gender, and  
23 occupation/previous occupation.  
24

25 *Imaging findings on CT and /or MRI* will be used to define the site, level, type and degree of  
26 pathology using classification systems for disc herniation [36] and severity of nerve root  
27 compression [37]. This data will be used to determine imaging predictors of response.  
28

29 *Medications:* use of all other medications including analgesics, NSAIDs, opiates, gabapentin and  
30 pregabalin will be documented at every visit.  
31

32  
33 *Economic evaluation based on a cost-utility analysis* in which the interventions are assess in terms  
34 of incremental costs per quality-adjusted-life-year using QALYs obtained from the **EuroQol**  
35 **5D**[38]. The EuroQol questionnaire will be administered at Eligibility, Baseline/Randomisation  
36 (day 0), day 1, day 7, weeks 3, 6, 12, 24, 48. Costs of the intervention will be assessed in terms of  
37 hospital, health care visits, investigations including additional CT/MRI imaging, procedure costs  
38 and medications costs. These will be valued with Diagnosis Related Groups cost weights, Medical  
39 Benefits Scheme standard fees, and Pharmaceutical Benefits Scheme. The perspective will be from  
40 the health sector. The incremental cost per QALY is estimated as the ratio of the difference in  
41 average cost and QALYs between intervention arms for three comparisons from: epidural steroid  
42 vs. dexamethasone taper vs. sham/placebo.  
43

44 **Adverse events** will be collected at day 1, day 7, weeks 3, 6, 12, 24, 48. These will include steroid  
45 adverse effects (blood pressure, blood glucose, changes in mood and sleep) and procedural adverse  
46 effects (headaches, bleeding) and information about additional procedures, surgery and  
47 hospitalisations.  
48  
49  
50  
51  
52  
53  
54  
55  
56  
57  
58  
59  
60

**Table 1: Schedule of enrolment, interventions and assessments**

|                                                                                 | STUDY PERIOD            |            |                 |       |    |        |      |     |    |     |     |           |
|---------------------------------------------------------------------------------|-------------------------|------------|-----------------|-------|----|--------|------|-----|----|-----|-----|-----------|
|                                                                                 | Screening & Eligibility | Allocation | Post allocation |       |    |        |      |     |    |     |     | Close-out |
|                                                                                 |                         |            | T1              | T2    | T3 | T4     | T5   | T6  | T7 | T8  | T9  |           |
| TIMEPOINT<br>D=Day W=Week                                                       | -T1                     | 0          | D1              | D 2-6 | D7 | D 8-15 | D14  | D21 | W6 | W12 | W24 | W48       |
| <b>ENROLMENT</b>                                                                |                         |            |                 |       |    |        |      |     |    |     |     |           |
| Eligibility Screen                                                              | ✓                       | ✓          |                 |       |    |        |      |     |    |     |     |           |
| Neurological and musculoskeletal Examination                                    | ✓                       | ✓          |                 |       |    |        |      |     |    |     |     |           |
| Safety Blood Tests                                                              | ✓                       | ✓          | ✓               |       | ✓  |        |      | ✓   |    |     |     |           |
| MRI (or CT if MRI contraindicated or CT clearly demonstrates imaging pathology) | ✓                       |            |                 |       |    |        |      |     |    |     |     |           |
| Oswestry Disability Index                                                       | ✓                       | ✓          |                 |       |    |        |      |     |    |     |     |           |
| Informed Consent                                                                | ✓                       |            |                 |       |    |        |      |     |    |     |     |           |
| Allocation                                                                      |                         | ✓          |                 |       |    |        |      |     |    |     |     |           |
| <b>INTERVENTIONS</b>                                                            |                         |            |                 |       |    |        |      |     |    |     |     |           |
| Procedural injection in radiology suite                                         |                         | X          |                 |       |    |        |      |     |    |     |     |           |
| Oral medications                                                                |                         | X          | X               | XXXX  | X  | XXXX   | XXXX |     |    |     |     |           |
| <b>ASSESSMENTS</b>                                                              |                         |            |                 |       |    |        |      |     |    |     |     |           |
| <b>Outcome Variables</b>                                                        |                         |            |                 |       |    |        |      |     |    |     |     |           |
| Oswestry Disability Index                                                       | ✓                       | ✓          | ✓               | ✓     | ✓  |        | ✓    | ✓   | ✓  | ✓   | ✓   | ✓         |
| Numerical Pain Rating Scales                                                    | ✓                       | ✓          | ✓               | ✓     | ✓  |        | ✓    | ✓   | ✓  | ✓   | ✓   | ✓         |
| PAIN DETECT Questionnaire                                                       | ✓                       | ✓          | ✓               |       | ✓  |        | ✓    | ✓   | ✓  | ✓   | ✓   | ✓         |
| SF-36                                                                           | ✓                       | ✓          |                 |       | ✓  |        | ✓    | ✓   | ✓  | ✓   | ✓   | ✓         |
| EQ-5D                                                                           | ✓                       | ✓          | ✓               |       | ✓  |        | ✓    | ✓   | ✓  | ✓   | ✓   | ✓         |
| Work/health utilisation/costs                                                   | ✓                       | ✓          | ✓               |       | ✓  |        | ✓    | ✓   | ✓  | ✓   | ✓   | ✓         |
| Medication History                                                              | ✓                       | ✓          | ✓               | ✓     | ✓  |        | ✓    | ✓   | ✓  | ✓   | ✓   | ✓         |
| Neurological and musculoskeletal Examination                                    |                         |            | ✓               |       | ✓  |        |      | ✓   | ✓  | ✓   | ✓   | ✓         |
| Safety Blood Tests                                                              |                         |            | ✓               |       | ✓  |        |      |     |    |     |     |           |
| <b>Other Data variables</b>                                                     |                         |            |                 |       |    |        |      |     |    |     |     |           |
| Rescue procedure history                                                        |                         |            | ✓               |       | ✓  |        |      | ✓   | ✓  | ✓   | ✓   | ✓         |
| Participation Randomization perception                                          |                         |            | ✓               |       | ✓  |        |      | ✓   | ✓  | ✓   | ✓   | ✓         |
| Adverse Events & Serious Adverse Event Assessment                               |                         | ✓          | ✓               | ✓     | ✓  |        |      | ✓   | ✓  | ✓   | ✓   | ✓         |

### Sample size

Most trials of subacute and chronic sciatica of a peri-neural steroid injection have a sample size of 30 participants per arm. In this pilot our aim will be to recruit at least 15 participants per arm. This is a total of 60 participants. This is sufficient to evaluate feasibility and to determine sample size for a main study

### Recruitment processes

Participants will be recruited from (i) EDs of public hospitals, (ii) current inpatients of public and private hospitals and (iii) referral from community general practitioner or medical specialist (rheumatologist, neurosurgeon or orthopaedic surgeon) from the Sydney metropolitan area around St George Hospital. It is anticipated that the majority of participants will be recruited from emergency department presentations and general practitioners. Participants with sciatica symptoms less than 21 days duration are screened so that participants can be evaluated and undergo the allocated intervention within the 4 weeks eligibility criteria.

St George Hospital Emergency Department, as well GPs and specialists in the hospital area have been provided information about SCIATICA study, the inclusion/exclusion criteria, explanation of the trial rationale, and the opening of a daily acute sciatica clinic at St George Hospital centre as the portal of entry for trial patients.

Participants presenting to the Emergency Department (ED) with acute sciatica are assessed according to ED's usual procedures and staff admit or discharge patients according to their usual care pathway. If the ED does not admit a potential acute sciatica participant, a study clinician is contacted by phone Monday-Friday 9am to 5pm (business hours) and a referral is faxed. Out of business hours, a referral is faxed to the acute sciatica clinic which is processed the next business day (see below). All referred participants are given a brochure by the referring ED clinician outlining the study. The acute sciatica clinic is also available for urgent referrals from community general practitioners and specialists. This is by fax or by telephone. These referred participants are also given a brochure by their referring clinician. All referred potential participants are logged. Within 1 to 3 days, Monday to Friday, all referred participants are contacted by telephone by a study clinician and a telephone history is obtained to ascertain suitability regarding inclusion and exclusion criteria. Where eligibility is clear or indeterminate, an eligibility visit is organised within the next couple of days. At this visit a full history and examination, musculoskeletal and neurological is conducted to determine underlying pathology, and if acute sciatica is likely, then lumbosacral imaging preferably with MRI imaging and blood pathology is requested. Patients complete routine clinical practice questionnaires as part of clinic audit including ODI, SF-36 and EQ-5D. Conservative therapy is initiated (medication/physiotherapy) as appropriate. Potential participants are provided with the Participant Information and Consent Form and further information regarding the RCT if eligibility criteria are likely. Once imaging and pathology becomes available the participant is contacted and informed of the results. If s/he meets the criteria s/he is invited to participate in the RCT. At one of the visits prior to randomisation, all participants are reviewed by the principal investigator to ensure that all eligibility criteria are met. This includes a full general, musculoskeletal and neurological history and clinical examination and confirmation of imaging. If eligibility criteria are met and the participant agrees to participate, then the participant proceeds down study pathway. Processes are in place to ensure that enrollees, if they agree to participate, are safely fast-tracked to randomisation and RCT interventions.

If patients do not agree to participate in the RCT they can either decide to continue their management in the acute sciatica clinic, and if their general practitioner is willing then the patient's ongoing management is determined by the rheumatologists who run the acute sciatica clinic. If the patient wishes to be managed by their GP, a letter from the acute sciatica clinic is sent to the GP to



1 facilitate management. The patient has the option of returning to the acute sciatica clinic for further  
2 management or advice as needed. A log of potential participants who decline or are ineligible for  
3 any reason is kept for later evaluation consistent with CONSORT guidelines. Reason for rejection  
4 or refusal will be recorded if available as well as age, gender, race/ethnicity and ODI score. If the  
5 participant does not wish to participate in the RCT but wish to be managed in the acute sciatica  
6 clinic they are included in a clinical audit of the management of acute sciatica. The management is  
7 determined in consultation with the patient and is generally conservative therapy unless there is  
8 severe pain and progressive functional disability preventing return to work or normal activities,  
9 progressive motor weakness, or features on the MRI imaging that suggests that neurosurgical  
10 review is needed.  
11  
12

13 The participant may clearly not meet the eligibility criteria at telephone screening. If patient safety  
14 is not an urgent consideration, patients who have anticipated or ongoing legal proceedings, need  
15 uninterrupted anti-coagulation or active cancer (as exclusion criteria) are not progressed to the  
16 eligibility visit but are asked to see or return to their treating doctor. Participants that do not have  
17 any leg pain are also asked to see or return to their treating doctor. However, if a referred patient  
18 has a history that suggests cauda equina syndrome or symptoms suggestive of malignant or  
19 infection-related pathology, the patient is seen urgently in the acute sciatica clinic and appropriate  
20 investigations and management are instituted.  
21  
22

23 If the participant does not wish to participate they are included in a clinical audit of the management  
24 of acute sciatica during the admission and the participant is continued to be managed according to  
25 the treating clinician. This is generally conservative therapy unless there is progressive severe pain  
26 and functional disability preventing discharge, progressive motor weakness, or features on the MRI  
27 imaging that suggests that neurosurgical review is needed.  
28

29 If the participant is admitted to hospital with acute sciatica the admitting team will contact the study  
30 investigators. Most patients with acute sciatica in our setting are either admitted under the general  
31 medical team, the rheumatology team or the neurosurgical team. The same processes are followed  
32 for in-patients as described above for out-patient referrals. Only a study investigator can consent a  
33 participant to participate in SCIATICA  
34

35 All participants are told that participation is voluntary, they can discuss participation with family,  
36 friends or their health care practitioners, and if they decide not to participate, it will not affect the  
37 treatment they receive now or in the future. They can have family and friends with them during the  
38 consent process. They can also withdraw from the study once it has started, at any time without  
39 having to give a reason.  
40  
41

#### 42 **Assignment of interventions**

43 Sequentially numbered, opaque and sealed envelopes contain the randomised intervention.  
44 Participants are randomly allocated 1:1:1:1 by computer-generated random numbers using permuted  
45 blocks stratified by duration of sciatica ( $\leq 2$  weeks,  $> 2$  weeks). The randomisation schedule  
46 including details of blocking schedule are held off-site by the randomised allocation sequence study  
47 investigator who is not involved in participant recruitment, assignment of interventions or data  
48 collection to ensure allocation concealment. This study investigator places the study medications  
49 and procedure instructions for each arm in separate opaque sealed envelopes. These two envelopes  
50 in turn are placed into a single larger opaque sealed envelope labelled with a sequential number and  
51 the randomisation number. The sealed envelopes are held in a locked cabinet until retrieved by the  
52 blinded study investigators who are involved in participant recruitment, provision of the study  
53 interventions, participant management and data collection. The acute sciatica clinic study  
54 investigators are blind to the study intervention.  
55  
56  
57  
58  
59  
60



## Implementation of interventions

The day of study intervention implementation, the participant has safety bloods performed, unless eligibility safety bloods had occurred in the previous week. The participant completes the study questionnaires and the study clinician once more ascertains eligibility criteria by history and examination immediately in the morning before attending the radiology suite. If the criteria are still met the study clinician indicates the exact site of the perineural injection on a request form that is provided to the interventional radiologist. For example, “perform a perineural injection of corticosteroid and local anaesthetic at L5/S1 targeting the right S1 nerve root”. The MRI images are also provided to the interventional radiologist. The research officer retrieves the next in sequence numbered large opaque labelled sealed envelope. The research officer accompanies the participant, taking the interventional request, images (films or on CD) and large opaque labelled sealed envelope to the radiology suite. At the radiology suite the research officer opens sealed opaque envelope, gives the ‘procedure’ envelope with instructions to the radiologist and exits. The radiologist evaluates the MRI images, then opens the procedure envelope. It contains one of three instructions: (i) perineural steroid and local anaesthetic injection, (ii) perineural normal saline and local anaesthetic injection or (iii) intramuscular sham injection down to muscle layer but no injection of any fluid. The side (right or left) and lumbosacral level (e.g L5/S1) is determined by the radiology request form. The participant is positioned prone as per a perineural injection, the CT fluoroscope is positioned as if a perineural injection is performed, local anaesthetic is injected into the skin and subcutaneous tissue. Radiologist and his staff maintain patient blinding. CT/fluoroscopic guided transforaminal lumbar epidural radiation parameters are set to reduce radiation dose. There is no radiation dose for CT/fluoroscopic guided transforaminal lumbar sham injection because the parameters are set to zero although the machine is on. All CT fluoroscopy images are saved for further analysis.

At the end of the procedure once outside the CT fluoroscopy room, the research officer gives the opaque envelope marked “Dexamethasone or placebo capsules” to the participant and explains how the medications are to be taken over the next 15 days. There are three plastic bottles labelled Days 1-5, Days 6-10 and Days 11-15. The participant opens the Day 1 labelled bottle and swallows the capsule. The participant continues to lie flat for at least one hour after the procedure, the participant is forbidden to drive for 24 hours and a person accompanies them home. The interventional radiology procedure report states that the participant had a procedure as part of the SCIATICA RCT and to contact the chief investigator if there is a concern, a phone number is provided.

## Masking/Blinding.

All personnel except the radiologist delivering the procedure and the investigator responsible for randomisation will be blind to the randomisation arm. The trial participant, study clinicians, research officers, participant’s treating care providers, outcome assessors, and data analysts are blind to the intervention assignments. In the event of a serious medical emergency during which the treating doctor must know in which arm the participant was randomised, the randomised code can be broken. Each participant is given a 24 hour emergency contact number and the principal investigator contacts the investigator who holds the randomisation schedule to determine the participants allocated intervention.

## Data collection, management and analysis

### Data collection methods

Data quality of outcome, baseline and other trial data is safeguarded with standardisation, assessor training and duplication of measurements and assessments by research officers administering the questionnaires and study clinicians undertaking the history and clinical examinations. All assessments are reviewed and the history and clinical findings confirmed by the principal investigator prior final eligibility determination. Study clinicians meet every 2 weeks to discuss ongoing assessments, issues of standardisation, equivocal or unclear findings and or any other concerns. All questionnaire data is scanned, with range checks for data values, and verified. Free

1 text data scanned and verified. Clinical data is coded and verified. Participants' retention and  
2 complete follow-up is encouraged through contact by phone or text and visits are organised so that  
3 they are maximally convenient for participants. This often requires visits to be conducted at the end  
4 of the normal working day.  
5

### 6 **Data analysis Plan**

7 Although this is a pilot study to evaluate several important clinical and trial design considerations  
8 the following data analysis plan is proposed for transparency. Effectiveness of treatment is analysed  
9 by intention-to-treat and the data analyst will be blind to group allocation. A two-tailed p-value  
10 <0.05 is considered statistical significant. The primary analysis is an analysis of variance evaluating  
11 the effects of treatment on the ODI at week 3, using treatment arm, baseline ODI and duration of  
12 symptoms in days as covariates. There are a total of 6 comparisons in this pilot RCT. *The primary*  
13 *comparison is Arm 1 versus Arm 4, i.e. epidural steroid versus sham procedure.* However, similar  
14 analyses will be applied to the other treatment comparisons (i.e. epidural steroid versus epidural  
15 saline, epidural steroid versus oral dexamethasone, oral dexamethasone versus oral placebo,  
16 epidural saline versus oral dexamethasone, epidural saline versus sham procedure). No penalty will  
17 be applied for the multiple comparisons in this pilot RCT. All comparisons are made at Day 21,  
18 where Day 0 is the day of the procedural intervention immediately followed by the first dose of the  
19 oral intervention. Day 21 is the 3 week endpoint. Similar analyses will also be applied at the 6 and  
20 48 week endpoints for the ODI. Multilevel linear mixed model will examine time trend by  
21 treatment group interaction. This linear mixed model will be used to model ODI trajectory across all  
22 10 time-points by treatment group, where treatment group is a property of the persons and visit is  
23 nested within person. The random-effects portion of the model specifies that months are a random  
24 effect. Analyses will be undertaken unadjusted and adjusted for medication use and other  
25 covariates. There is no interim analysis.

26 Other outcome measures (NRSs, SF-36, EQ-5D and clinical data measured on a continuous scale  
27 will also be analysed with multilevel mixed effects linear regression. All analyses will be  
28 undertaken unadjusted and adjusted for other medication use, type of procedural steroid, presence  
29 of neurological signs, and MRI findings with multivariate methods. A full description of  
30 neurological signs will be reported in tabular form and descriptive statistics. Safety data will be  
31 analysed in reported in tabular form and with descriptive statistics.  
32

## 33 **ETHICS AND DISSEMINATION**

### 34 **Ethics**

35 The study has been approved by South Eastern Sydney Local Health District Human Research  
36 Ethics Committee and is guided by a Data Safety and Monitoring Board and South Eastern Sydney  
37 Local Health District Human Research Ethics Executive (HREC15/331) Protocol version 3, 67  
38 April 2016. Any changes to the protocol are reported to this committee.  
39

### 40 **Data monitoring**

41 A data safety and monitoring committee (DSMC) will meet after the first 10 participants have been  
42 randomised to evaluate study conduct and safety. The DSMC will consist of the principal  
43 investigator (non-voting), a interventional radiologist, neurosurgeon, rheumatologist, and general  
44 physician. Adverse event monitoring and withdrawal of participants are discussed. The DSMC will  
45 meet every 4 months. The DSMC will be provided blinded data but unblinded data can be provided  
46 for a specific participant if requested by the committee. If requested it will be provided by an  
47 investigator who holds the randomisation schedule.  
48  
49  
50  
51  
52  
53  
54  
55  
56  
57  
58  
59

## Harms

CT/fluoroscopic guided transforaminal lumbar epidural steroid (1 ml) and local anaesthetic (1ml) is used in the management of sciatica of all durations. The risks associated with this procedure include:

*Dural puncture:* the needle penetrates into the sac encasing the nerves within the spinal canal, causing leakage of fluid contained within the sac, known as CSF (cerebrospinal fluid). The risk of this procedure is approximately 1% and is treated with flat bed rest for four hours.

*Infection:* most of these are minor (1-2%), however can be serious (<0.1%) requiring hospital admission, intravenous antibiotics and surgery.

*Bleeding:* this is rare although more common in patients with bleeding disorders and on “blood thinning” medication. Patients who cannot cease their medications will be excluded from the study (e.g. patients with mechanical heart valve, recent deep venous thrombosis and pulmonary embolus, recent cardiac stent). Otherwise, patients on warfarin have an INR and depending on the value will be asked to cease the warfarin 5 days prior to the procedure and an INR will be checked the day before the procedure and the value must be <1.5. Pradaxa (dabigatran) must be ceased 3 days prior to the procedure, aspirin and platelet inhibitors (plavix, iscover, ticlopidine, persantin) ceased 7 days prior to the procedure, cleaxane cease 24 hours prior to the procedure. NSAIDs and COX2 inhibitors do not need to be ceased.

*Nerve damage:* from direct needle trauma, or as a consequence of the above mentioned complications is rare.

*Stroke and spinal cord injury:* Most of the reported serious complications result from inadvertently injecting steroids with particulate matter into blood vessels close to the injection site, which can lead to brain or spinal cord injury. The risk of stroke or spinal cord damage from a transforaminal epidural steroid injection in the back is quite low when done under CT fluoroscopy.

The risks of high dose short term oral corticosteroids are more common (10-20%) and include insomnia, nervousness, increased appetite, indigestion, headache. There are risks in patients with active peptic ulcer disease of perforation, worsening hypertension in patients with severe hypertension, and hyperglycemia in patients with poorly controlled diabetes or on insulin treatment. These patients are excluded from the trial. Patients who are on diet or oral hypoglycemic medications will be monitored with blood tests to minimise risk of significant hyperglycemia. However, these symptoms and abnormal blood tests will cease with stopping of treatment. There is no risk of suddenly stopping dexamethasone in this study as it is only being administered for 2 weeks.

It is important that women participating in this study are not pregnant or lactating as the study CT scan fluoroscopy radiation, although small, is not zero, and dexamethasone is secreted in breast milk.

An adverse event is any untoward medical occurrence in a participant which does not necessarily have a causal relationship with the study treatment. An adverse event can therefore be any unfavourable or unintended sign, symptom or condition and/or an observation that may or may not be related to the study treatment. A serious adverse event is any untoward medical occurrence that results in the following: death, is life-threatening, requires inpatient hospitalization or prolongation of existing hospitalization, persistent or significant disability/incapacity or congenital/birth defect, condition requiring unnecessary medical or surgical intervention. Solicited reporting of adverse events occurs Days 1 to 7, Weeks 3, 6, 12, 24, 48. Participants can also contact study investigators at any time if they have any concerns. All adverse events are reported to the principal investigator and all serious adverse events are reported to the DMSC and Human Research Ethics Committee.

## **Auditing**

A study meeting to audit trial conduct occurs fortnightly. There is no independent trial audit other than that provided by the DSMC and that required by the Human Research Ethics Committee.

## **DISCUSSION**

### **Clinical, trial design and political significance**

There is no randomised controlled trial evidence for the use of CT-guided transforaminal epidural steroid in acute sciatica. There is limited evidence for the use of oral steroids in acute and subacute sciatica. There is a clear advantage of directly comparing different interventions in a single randomised control trial. These advantages include improving internal validity, marginally reducing sample size, and limiting heterogeneity by standardising assessments and conduct procedures. However, there are also disadvantages such as longer time to trial recruitment, therefore longer time to trial completion, more exclusion criteria because of differing interventions, and difficulty explaining design to participants. Often evidence is based on incremental advances in large simple 2-arm studies. Other discussion issues additional to those specific to the study objectives include advantages and disadvantages of different trial considerations in the management of acute sciatica, particularly if comparing a procedural intervention with oral medications, the effectiveness of blinding, when to offer rescue therapy, the difficulty recruiting participants to a randomised controlled trial when non-evidence based therapy based is delivered because new treatments have face validity and a considerable placebo effect.

### **Access to Data and Dissemination**

The investigators have access to the final trial dataset. There are no contractual agreements limiting access. Study results of this trial will be submitted for publication in a peer-reviewed journal. Individual level data will be made available after the findings of the study have been published. This data can be used for IPD meta-analyses or for further exploratory research. To obtain this data please contact Marissa Lassere.

The trial is registered on ClinicalTrials. Gov - NCT03240783

## **ACKNOWLEDGEMENTS**

We would like to thank Dr Derek Glenn, Head, Department of Radiology St George Hospital, Kogarah for assisting with the information regarding radiation safety, Dr Carl Bryant, Bryant Radiology, St George Private Hospital for undertaking the interventional procedures and Ms Sue Baker for developing the case report forms, setting up the database and assisting with the ethics application, and Ms Jenny Gu for editing the case report forms.

## **COMPETING INTERESTS STATEMENT**

There are no competing interests.

## **AUTHORS' CONTRIBUTION**

Marissa Lassere conceived and designed the study. Marissa Lassere and Kent Johnson wrote the first draft of the protocol. Peter Smerdely, Grant Pickard and Jeanette Thom critically reviewed the protocol for important intellectual content and approved the final version.

## **FUNDING STATEMENT.**

This work was supported by The St George and Sutherland Medical Research Foundation, development grant number 2016/13. <http://www.stgeorgemrf.com.au/2015/11/02/our-2016-grants/> The sponsor had no role in the study design of this protocol and will have no role in the collection, management, analysis, and interpretation of data; writing of the report; and the decision to submit the report for publication, or authority over any of these activities.

**FULL REFERENCES**

1. Koes BW, van Tulder MW, Peul WC. Diagnosis and treatment of sciatica. *BMJ* 2007;**334**(7607):1313-7 doi: 10.1136/bmj.39223.428495.
2. Bogduk N. On the definitions and physiology of back pain, referred pain, and radicular pain. *Pain* 2009;**147**(1-3):17-9 doi: 10.1016/j.pain.2009.08.020
3. Stafford MA, Peng P, Hill DA. Sciatica: a review of history, epidemiology, pathogenesis, and the role of epidural steroid injection in management. *British journal of anaesthesia* 2007;**99**(4):461-73 doi: 10.1093/bja/aem238
4. Valat JP, Genevay S, Marty M, et al. Sciatica. Best practice & research *Clinical rheumatology* 2010;**24**(2):241-52 doi: 10.1016/j.berh.2009.11.005
5. Lin CW, Verwoerd AJ, Maher CG, et al. How is radiating leg pain defined in randomized controlled trials of conservative treatments in primary care? A systematic review. *European journal of pain* 2014;**18**(4):455-64 doi: 10.1002/j.1532-2149.2013.00384.x
6. Tarulli AW, Raynor EM. Lumbosacral radiculopathy. *Neurologic clinics* 2007;**25**(2):387-405 doi: 10.1016/j.ncl.2007.01.008
7. Henschke N, Maher CG, Refshauge KM, et al. Characteristics of patients with acute low back pain presenting to primary care in Australia. *The Clinical Journal of Pain* 2009;**25**(1):5-11 doi: 10.1097/AJP.0b013e3181817a8d
8. Weber H, Holme I, Amlie E. The natural course of acute sciatica with nerve root symptoms in a double-blind placebo-controlled trial evaluating the effect of piroxicam. *Spine* 1993;**18**(11):1433-8
9. Pinto RZ, Maher CG, Ferreira ML, et al. Drugs for relief of pain in patients with sciatica: systematic review and meta-analysis. *BMJ* 2012;**344**:e497 doi: 10.1136/bmj.e497
10. Mathieson S, Maher CG, McLachlan AJ, et al. PRECISE - pregabalin in addition to usual care for sciatica: study protocol for a randomised controlled trial. *Trials* 2013;**14**:213 doi: 10.1186/1745-6215-14-213
11. Staal JB, de Bie R, de Vet HC, et al. Injection therapy for subacute and chronic low-back pain. *Cochrane Database of Systematic Reviews* 2008(3):CD001824
12. Pinto RZ, Maher CG, Ferreira ML, et al. Epidural corticosteroid injections in the management of sciatica: a systematic review and meta-analysis. *Annals of internal medicine* 2012;**157**(12):865-77
13. Chang-Chien GC, Knezevic NN, McCormick Z, et al. Transforaminal versus interlaminar approaches to epidural steroid injections: a systematic review of comparative studies for lumbosacral radicular pain. *Pain physician* 2014;**17**(4):E509-24
14. Riew KD, Yin Y, Gilula L, et al. The effect of nerve-root injections on the need for operative treatment of lumbar radicular pain. A prospective, randomized, controlled, double-blind study. *The Journal of bone and joint surgery American volume* 2000;**82-A**(11):1589-93
15. Karppinen J, Malmivaara A, Kurunlahti M, et al. Periradicular infiltration for sciatica: a randomized controlled trial. *Spine* 2001;**26**(9):1059-67
16. Tafazal S, Ng L, Chaudhary N, et al. Corticosteroids in peri-radicular infiltration for radicular pain: a randomised double blind controlled trial. One year results and subgroup analysis. *European spine journal : official publication of the European Spine Society, the European Spinal Deformity Society, and the European Section of the Cervical Spine Research Society* 2009;**18**(8):1220-5 doi: 10.1007/s00586-009-1000-2[published Online First: Epub Date].
17. Ghahreman A, Ferch R, Bogduk N. The efficacy of transforaminal injection of steroids for the treatment of lumbar radicular pain. *Pain medicine* 2010;**11**(8):1149-68 doi: 10.1111/j.1526-4637.2010.00908.x
18. Cohen SP, White RL, Kurihara C, et al. Epidural steroids, etanercept, or saline in subacute sciatica: a multicenter, randomized trial. *Annals of internal medicine* 2012;**156**(8):551-9 doi: 10.7326/0003-4819-156-8-201204170-00002



19. Manchikanti L, Cash KA, Pampati V, et al. Transforaminal epidural injections in chronic lumbar disc herniation: a randomized, double-blind, active-control trial. *Pain physician* 2014;**17**(4):E489-501
20. Bhatia A, Flamer D, Shah PS, et al. Transforaminal Epidural Steroid Injections for Treating Lumbosacral Radicular Pain from Herniated Intervertebral Discs: A Systematic Review and Meta-Analysis. *Anesthesia and analgesia* 2016;**122**(3):857-70 doi: 10.1213/ANE.0000000000001155
21. Epstein NE. The risks of epidural and transforaminal steroid injections in the Spine: Commentary and a comprehensive review of the literature. *Surgical neurology international* 2013;**4**(Suppl 2):S74-93 doi: 10.4103/2152-7806.109446
22. Manchikanti L, Candido KD, Singh V, et al. Epidural steroid warning controversy still dogging FDA. *Pain physician* 2014;**17**(4):E451-74
23. Rathmell JP, Benzon HT, Dreyfuss P, et al. Safeguards to prevent neurologic complications after epidural steroid injections: consensus opinions from a multidisciplinary working group and national organizations. *Anesthesiology* 2015;**122**(5):974-84 doi: 10.1097/ALN.0000000000000614
24. El-Yahouchi C, Geske JR, Carter RE, et al. The noninferiority of the nonparticulate steroid dexamethasone vs the particulate steroids betamethasone and triamcinolone in lumbar transforaminal epidural steroid injections. *Pain medicine* 2013;**14**(11):1650-7 doi: 10.1111/pme.12214
25. Kennedy DJ, Plastaras C, Casey E, et al. Comparative effectiveness of lumbar transforaminal epidural steroid injections with particulate versus nonparticulate corticosteroids for lumbar radicular pain due to intervertebral disc herniation: a prospective, randomized, double-blind trial. *Pain medicine* 2014;**15**(4):548-55 doi: 10.1111/pme.12325
26. Denis I, Claveau G, Filiatrault M, et al. Randomized Double-Blind Controlled Trial Comparing the Effectiveness of Lumbar Transforaminal Epidural Injections of Particulate and Nonparticulate Corticosteroids for Lumbosacral Radicular Pain. *Pain medicine* 2015 doi: 10.1111/pme.12846
27. Roncoroni C, Baillet A, Durand M, et al. Efficacy and tolerance of systemic steroids in sciatica: a systematic review and meta-analysis. *Rheumatology* 2011;**50**(9):1603-11 doi: 10.1093/rheumatology/ker151
28. Balakrishnamoorthy R, Horgan I, Perez S, et al. Does a single dose of intravenous dexamethasone reduce Symptoms in Emergency department patients with low Back pain and RADiculopathy (SEBRA)? A double-blind randomised controlled trial. *Emergency medicine journal : EMJ* 2015;**32**(7):525-30 doi: 10.1136/emmermed-2013-203490
29. Goldberg H, Firtch W, Tyburski M, et al. Oral steroids for acute radiculopathy due to a herniated lumbar disk: a randomized clinical trial. *Jama* 2015;**313**(19):1915-23 doi: 10.1001/jama.2015.4468
30. Chiarotto A, Deyo RA, Terwee CB, et al. Core outcome domains for clinical trials in non-specific low back pain. *European spine journal : official publication of the European Spine Society, the European Spinal Deformity Society, and the European Section of the Cervical Spine Research Society* 2015;**24**(6):1127-42 doi: 10.1007/s00586-015-3892-3
31. Fairbank JC, Pynsent PB. The Oswestry Disability Index. *Spine* 2000;**25**(22):2940-52; discussion 52
32. Guzman JZ, Cutler HS, Connolly J, et al. Patient-Reported Outcome Instruments in Spine Surgery. *Spine* 2016;**41**(5):429-37 doi: 10.1097/BRS.0000000000001211
33. Williamson A, Hoggart B. Pain: a review of three commonly used pain rating scales. *Journal of clinical nursing* 2005;**14**(7):798-804 doi: 10.1111/j.1365-2702.2005.01121.x
34. Shaygan M, Boger A, Kroner-Herwig B. Clinical features of chronic pain with neuropathic characteristics: a symptom-based assessment using the pain DETECT questionnaire. *European journal of pain* 2013;**17**(10):1529-38 doi: 10.1002/j.1532-2149.2013.00322.x



- 1 35. Ware JEa. SF-36 Health Survey : manual and interpretation guide. 1993, Boston: The Health  
2 Institute, New England Medical Cente. 1993
- 3
- 4 36. Fardon DF, Milette PC, Combined Task Forces of the North American Spine Society ASoSR, et  
5 al. Nomenclature and classification of lumbar disc pathology. Recommendations of the  
6 Combined task Forces of the North American Spine Society, American Society of Spine  
7 Radiology, and American Society of Neuroradiology. Spine 2001;**26**(5):E93-E113
- 8 37. Pfirrmann CW, Dora C, Schmid MR, et al. MR image-based grading of lumbar nerve root  
9 compromise due to disk herniation: reliability study with surgical correlation. Radiology  
10 2004;**230**(2):583-8 doi: 10.1148/radiol.2302021289
- 11 38. Dolan P. Modeling valuations for EuroQol health states. Medical care 1997;**35**(11):1095-108
- 12
- 13
- 14
- 15
- 16
- 17
- 18
- 19
- 20
- 21
- 22
- 23
- 24
- 25
- 26
- 27
- 28
- 29
- 30
- 31
- 32
- 33
- 34
- 35
- 36
- 37
- 38
- 39
- 40
- 41
- 42
- 43
- 44
- 45
- 46
- 47
- 48
- 49
- 50
- 51
- 52
- 53
- 54
- 55
- 56
- 57
- 58
- 59
- 60

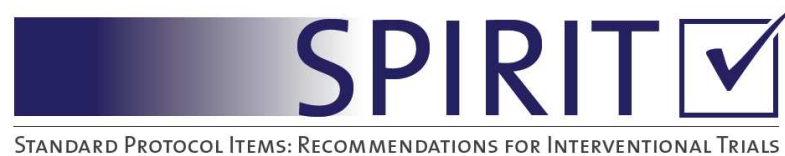

SPIRIT 2013 Checklist: Recommended items to address in a clinical trial protocol and related documents\*

| Section/item                      | Item No | Description                                                                                                                                                                                                                                                                              | Addressed on page number |
|-----------------------------------|---------|------------------------------------------------------------------------------------------------------------------------------------------------------------------------------------------------------------------------------------------------------------------------------------------|--------------------------|
| <b>Administrative information</b> |         |                                                                                                                                                                                                                                                                                          |                          |
| Title                             | 1       | Descriptive title identifying the study design, population, interventions, and, if applicable, trial acronym                                                                                                                                                                             | 1                        |
| Trial registration                | 2a      | Trial identifier and registry name. If not yet registered, name of intended registry                                                                                                                                                                                                     | 2                        |
|                                   | 2b      | All items from the World Health Organization Trial Registration Data Set                                                                                                                                                                                                                 |                          |
| Protocol version                  | 3       | Date and version identifier                                                                                                                                                                                                                                                              | 14                       |
| Funding                           | 4       | Sources and types of financial, material, and other support                                                                                                                                                                                                                              | 16                       |
| Roles and responsibilities        | 5a      | Names, affiliations, and roles of protocol contributors                                                                                                                                                                                                                                  | 1, 17                    |
|                                   | 5b      | Name and contact information for the trial sponsor                                                                                                                                                                                                                                       | 17                       |
|                                   | 5c      | Role of study sponsor and funders, if any, in study design; collection, management, analysis, and interpretation of data; writing of the report; and the decision to submit the report for publication, including whether they will have ultimate authority over any of these activities | 17, 18                   |
|                                   | 5d      | Composition, roles, and responsibilities of the coordinating centre, steering committee, endpoint adjudication committee, data management team, and other individuals or groups overseeing the trial, if applicable (see Item 21a for data monitoring committee)                         | 14                       |

1  
2  
3  
4  
5  
6  
7  
8  
9  
10  
11  
12  
13  
14  
15  
16  
17  
18  
19  
20  
21  
22  
23  
24  
25  
26  
27  
28  
29  
30  
31  
32  
33  
34  
35  
36  
37  
38  
39  
40  
41  
42  
43  
44  
45  
46  
47

## Introduction

|                          |    |                                                                                                                                                                                                           |          |
|--------------------------|----|-----------------------------------------------------------------------------------------------------------------------------------------------------------------------------------------------------------|----------|
| Background and rationale | 6a | Description of research question and justification for undertaking the trial, including summary of relevant studies (published and unpublished) examining benefits and harms for each intervention        | 3-5      |
|                          | 6b | Explanation for choice of comparators                                                                                                                                                                     | 3-5, 7-8 |
| Objectives               | 7  | Specific objectives or hypotheses                                                                                                                                                                         | 5        |
| Trial design             | 8  | Description of trial design including type of trial (eg, parallel group, crossover, factorial, single group), allocation ratio, and framework (eg, superiority, equivalence, noninferiority, exploratory) | 7        |

## Methods: Participants, interventions, and outcomes

|                      |     |                                                                                                                                                                                                                                                                                                                                                                                |       |
|----------------------|-----|--------------------------------------------------------------------------------------------------------------------------------------------------------------------------------------------------------------------------------------------------------------------------------------------------------------------------------------------------------------------------------|-------|
| Study setting        | 9   | Description of study settings (eg, community clinic, academic hospital) and list of countries where data will be collected. Reference to where list of study sites can be obtained                                                                                                                                                                                             | 11    |
| Eligibility criteria | 10  | Inclusion and exclusion criteria for participants. If applicable, eligibility criteria for study centres and individuals who will perform the interventions (eg, surgeons, psychotherapists)                                                                                                                                                                                   | 6     |
| Interventions        | 11a | Interventions for each group with sufficient detail to allow replication, including how and when they will be administered                                                                                                                                                                                                                                                     | 7-8   |
|                      | 11b | Criteria for discontinuing or modifying allocated interventions for a given trial participant (eg, drug dose change in response to harms, participant request, or improving/worsening disease)                                                                                                                                                                                 | 14-15 |
|                      | 11c | Strategies to improve adherence to intervention protocols, and any procedures for monitoring adherence (eg, drug tablet return, laboratory tests)                                                                                                                                                                                                                              | 12    |
|                      | 11d | Relevant concomitant care and interventions that are permitted or prohibited during the trial                                                                                                                                                                                                                                                                                  | 8     |
| Outcomes             | 12  | Primary, secondary, and other outcomes, including the specific measurement variable (eg, systolic blood pressure), analysis metric (eg, change from baseline, final value, time to event), method of aggregation (eg, median, proportion), and time point for each outcome. Explanation of the clinical relevance of chosen efficacy and harm outcomes is strongly recommended | 8-10  |
| Participant timeline | 13  | Time schedule of enrolment, interventions (including any run-ins and washouts), assessments, and visits for participants. A schematic diagram is highly recommended (see Figure)                                                                                                                                                                                               | 10    |

|   |             |    |                                                                                                                                                                                       |    |
|---|-------------|----|---------------------------------------------------------------------------------------------------------------------------------------------------------------------------------------|----|
| 1 |             |    |                                                                                                                                                                                       |    |
| 2 |             |    |                                                                                                                                                                                       |    |
| 3 | Sample size | 14 | Estimated number of participants needed to achieve study objectives and how it was determined, including clinical and statistical assumptions supporting any sample size calculations | 11 |
| 4 |             |    |                                                                                                                                                                                       |    |
| 5 | Recruitment | 15 | Strategies for achieving adequate participant enrolment to reach target sample size                                                                                                   | 11 |
| 6 |             |    |                                                                                                                                                                                       |    |
| 7 |             |    |                                                                                                                                                                                       |    |

### 8 **Methods: Assignment of interventions (for controlled trials)**

#### 9 Allocation:

|    |                                  |     |                                                                                                                                                                                                                                                                                                                                                          |       |
|----|----------------------------------|-----|----------------------------------------------------------------------------------------------------------------------------------------------------------------------------------------------------------------------------------------------------------------------------------------------------------------------------------------------------------|-------|
| 10 |                                  |     |                                                                                                                                                                                                                                                                                                                                                          |       |
| 11 |                                  |     |                                                                                                                                                                                                                                                                                                                                                          |       |
| 12 | Sequence generation              | 16a | Method of generating the allocation sequence (eg, computer-generated random numbers), and list of any factors for stratification. To reduce predictability of a random sequence, details of any planned restriction (eg, blocking) should be provided in a separate document that is unavailable to those who enrol participants or assign interventions | 12    |
| 13 |                                  |     |                                                                                                                                                                                                                                                                                                                                                          |       |
| 14 |                                  |     |                                                                                                                                                                                                                                                                                                                                                          |       |
| 15 |                                  |     |                                                                                                                                                                                                                                                                                                                                                          |       |
| 16 |                                  |     |                                                                                                                                                                                                                                                                                                                                                          |       |
| 17 | Allocation concealment mechanism | 16b | Mechanism of implementing the allocation sequence (eg, central telephone; sequentially numbered, opaque, sealed envelopes), describing any steps to conceal the sequence until interventions are assigned                                                                                                                                                | 12-13 |
| 18 |                                  |     |                                                                                                                                                                                                                                                                                                                                                          |       |
| 19 |                                  |     |                                                                                                                                                                                                                                                                                                                                                          |       |
| 20 |                                  |     |                                                                                                                                                                                                                                                                                                                                                          |       |
| 21 | Implementation                   | 16c | Who will generate the allocation sequence, who will enrol participants, and who will assign participants to interventions                                                                                                                                                                                                                                | 12    |
| 22 |                                  |     |                                                                                                                                                                                                                                                                                                                                                          |       |
| 23 |                                  |     |                                                                                                                                                                                                                                                                                                                                                          |       |
| 24 | Blinding (masking)               | 17a | Who will be blinded after assignment to interventions (eg, trial participants, care providers, outcome assessors, data analysts), and how                                                                                                                                                                                                                | 12-13 |
| 25 |                                  |     |                                                                                                                                                                                                                                                                                                                                                          |       |
| 26 |                                  |     |                                                                                                                                                                                                                                                                                                                                                          |       |
| 27 |                                  | 17b | If blinded, circumstances under which unblinding is permissible, and procedure for revealing a participant's allocated intervention during the trial                                                                                                                                                                                                     | 13    |
| 28 |                                  |     |                                                                                                                                                                                                                                                                                                                                                          |       |
| 29 |                                  |     |                                                                                                                                                                                                                                                                                                                                                          |       |
| 30 |                                  |     |                                                                                                                                                                                                                                                                                                                                                          |       |

### 31 **Methods: Data collection, management, and analysis**

|    |                         |     |                                                                                                                                                                                                                                                                                                                                                                                                              |           |
|----|-------------------------|-----|--------------------------------------------------------------------------------------------------------------------------------------------------------------------------------------------------------------------------------------------------------------------------------------------------------------------------------------------------------------------------------------------------------------|-----------|
| 32 |                         |     |                                                                                                                                                                                                                                                                                                                                                                                                              |           |
| 33 | Data collection methods | 18a | Plans for assessment and collection of outcome, baseline, and other trial data, including any related processes to promote data quality (eg, duplicate measurements, training of assessors) and a description of study instruments (eg, questionnaires, laboratory tests) along with their reliability and validity, if known. Reference to where data collection forms can be found, if not in the protocol | 8, 13, 14 |
| 34 |                         |     |                                                                                                                                                                                                                                                                                                                                                                                                              |           |
| 35 |                         |     |                                                                                                                                                                                                                                                                                                                                                                                                              |           |
| 36 |                         |     |                                                                                                                                                                                                                                                                                                                                                                                                              |           |
| 37 |                         |     |                                                                                                                                                                                                                                                                                                                                                                                                              |           |
| 38 |                         | 18b | Plans to promote participant retention and complete follow-up, including list of any outcome data to be collected for participants who discontinue or deviate from intervention protocols                                                                                                                                                                                                                    | 12        |
| 39 |                         |     |                                                                                                                                                                                                                                                                                                                                                                                                              |           |
| 40 |                         |     |                                                                                                                                                                                                                                                                                                                                                                                                              |           |
| 41 |                         |     |                                                                                                                                                                                                                                                                                                                                                                                                              |           |
| 42 |                         |     |                                                                                                                                                                                                                                                                                                                                                                                                              |           |
| 43 |                         |     |                                                                                                                                                                                                                                                                                                                                                                                                              |           |
| 44 |                         |     |                                                                                                                                                                                                                                                                                                                                                                                                              |           |
| 45 |                         |     |                                                                                                                                                                                                                                                                                                                                                                                                              |           |
| 46 |                         |     |                                                                                                                                                                                                                                                                                                                                                                                                              |           |
| 47 |                         |     |                                                                                                                                                                                                                                                                                                                                                                                                              |           |

1  
2  
3  
4  
5  
6  
7  
8  
9  
10  
11  
12  
13  
14  
15  
16  
17  
18  
19  
20  
21  
22  
23  
24  
25  
26  
27  
28  
29  
30  
31  
32  
33  
34  
35  
36  
37  
38  
39  
40  
41  
42  
43  
44  
45  
46  
47

|                 |    |                                                                                                                                                                                                                                                                   |                  |
|-----------------|----|-------------------------------------------------------------------------------------------------------------------------------------------------------------------------------------------------------------------------------------------------------------------|------------------|
| Data management | 19 | Plans for data entry, coding, security, and storage, including any related processes to promote data quality (eg, double data entry; range checks for data values). Reference to where details of data management procedures can be found, if not in the protocol | In HREC protocol |
|-----------------|----|-------------------------------------------------------------------------------------------------------------------------------------------------------------------------------------------------------------------------------------------------------------------|------------------|

|                     |     |                                                                                                                                                                          |    |
|---------------------|-----|--------------------------------------------------------------------------------------------------------------------------------------------------------------------------|----|
| Statistical methods | 20a | Statistical methods for analysing primary and secondary outcomes. Reference to where other details of the statistical analysis plan can be found, if not in the protocol | 14 |
|---------------------|-----|--------------------------------------------------------------------------------------------------------------------------------------------------------------------------|----|

|  |     |                                                                          |    |
|--|-----|--------------------------------------------------------------------------|----|
|  | 20b | Methods for any additional analyses (eg, subgroup and adjusted analyses) | 14 |
|--|-----|--------------------------------------------------------------------------|----|

|  |     |                                                                                                                                                                                 |    |
|--|-----|---------------------------------------------------------------------------------------------------------------------------------------------------------------------------------|----|
|  | 20c | Definition of analysis population relating to protocol non-adherence (eg, as randomised analysis), and any statistical methods to handle missing data (eg, multiple imputation) | 14 |
|--|-----|---------------------------------------------------------------------------------------------------------------------------------------------------------------------------------|----|

**Methods: Monitoring**

|                 |     |                                                                                                                                                                                                                                                                                                                                       |    |
|-----------------|-----|---------------------------------------------------------------------------------------------------------------------------------------------------------------------------------------------------------------------------------------------------------------------------------------------------------------------------------------|----|
| Data monitoring | 21a | Composition of data monitoring committee (DMC); summary of its role and reporting structure; statement of whether it is independent from the sponsor and competing interests; and reference to where further details about its charter can be found, if not in the protocol. Alternatively, an explanation of why a DMC is not needed | 14 |
|-----------------|-----|---------------------------------------------------------------------------------------------------------------------------------------------------------------------------------------------------------------------------------------------------------------------------------------------------------------------------------------|----|

|  |     |                                                                                                                                                                         |    |
|--|-----|-------------------------------------------------------------------------------------------------------------------------------------------------------------------------|----|
|  | 21b | Description of any interim analyses and stopping guidelines, including who will have access to these interim results and make the final decision to terminate the trial | 14 |
|--|-----|-------------------------------------------------------------------------------------------------------------------------------------------------------------------------|----|

|       |    |                                                                                                                                                                                   |      |
|-------|----|-----------------------------------------------------------------------------------------------------------------------------------------------------------------------------------|------|
| Harms | 22 | Plans for collecting, assessing, reporting, and managing solicited and spontaneously reported adverse events and other unintended effects of trial interventions or trial conduct | 9,15 |
|-------|----|-----------------------------------------------------------------------------------------------------------------------------------------------------------------------------------|------|

|          |    |                                                                                                                                             |    |
|----------|----|---------------------------------------------------------------------------------------------------------------------------------------------|----|
| Auditing | 23 | Frequency and procedures for auditing trial conduct, if any, and whether the process will be independent from investigators and the sponsor | 16 |
|----------|----|---------------------------------------------------------------------------------------------------------------------------------------------|----|

**Ethics and dissemination**

|                          |    |                                                                                           |          |
|--------------------------|----|-------------------------------------------------------------------------------------------|----------|
| Research ethics approval | 24 | Plans for seeking research ethics committee/institutional review board (REC/IRB) approval | approved |
|--------------------------|----|-------------------------------------------------------------------------------------------|----------|

|                     |    |                                                                                                                                                                                                                                  |    |
|---------------------|----|----------------------------------------------------------------------------------------------------------------------------------------------------------------------------------------------------------------------------------|----|
| Protocol amendments | 25 | Plans for communicating important protocol modifications (eg, changes to eligibility criteria, outcomes, analyses) to relevant parties (eg, investigators, REC/IRBs, trial participants, trial registries, journals, regulators) | 14 |
|---------------------|----|----------------------------------------------------------------------------------------------------------------------------------------------------------------------------------------------------------------------------------|----|

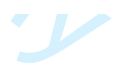

|    |                               |     |                                                                                                                                                                                                                                                                                     |                                       |
|----|-------------------------------|-----|-------------------------------------------------------------------------------------------------------------------------------------------------------------------------------------------------------------------------------------------------------------------------------------|---------------------------------------|
| 1  |                               |     |                                                                                                                                                                                                                                                                                     |                                       |
| 2  |                               |     |                                                                                                                                                                                                                                                                                     |                                       |
| 3  | Consent or assent             | 26a | Who will obtain informed consent or assent from potential trial participants or authorised surrogates, and how (see Item 32)                                                                                                                                                        | 11,12                                 |
| 4  |                               |     |                                                                                                                                                                                                                                                                                     |                                       |
| 5  |                               |     |                                                                                                                                                                                                                                                                                     |                                       |
| 6  |                               | 26b | Additional consent provisions for collection and use of participant data and biological specimens in ancillary studies, if applicable                                                                                                                                               | NA                                    |
| 7  |                               |     |                                                                                                                                                                                                                                                                                     |                                       |
| 8  | Confidentiality               | 27  | How personal information about potential and enrolled participants will be collected, shared, and maintained in order to protect confidentiality before, during, and after the trial                                                                                                | IN HREC protocol                      |
| 9  |                               |     |                                                                                                                                                                                                                                                                                     |                                       |
| 10 |                               |     |                                                                                                                                                                                                                                                                                     |                                       |
| 11 | Declaration of interests      | 28  | Financial and other competing interests for principal investigators for the overall trial and each study site                                                                                                                                                                       | 16                                    |
| 12 |                               |     |                                                                                                                                                                                                                                                                                     |                                       |
| 13 |                               |     |                                                                                                                                                                                                                                                                                     |                                       |
| 14 | Access to data                | 29  | Statement of who will have access to the final trial dataset, and disclosure of contractual agreements that limit such access for investigators                                                                                                                                     | 16                                    |
| 15 |                               |     |                                                                                                                                                                                                                                                                                     |                                       |
| 16 |                               |     |                                                                                                                                                                                                                                                                                     |                                       |
| 17 | Ancillary and post-trial care | 30  | Provisions, if any, for ancillary and post-trial care, and for compensation to those who suffer harm from trial participation                                                                                                                                                       | In patient consent/HREC documentation |
| 18 |                               |     |                                                                                                                                                                                                                                                                                     |                                       |
| 19 |                               |     |                                                                                                                                                                                                                                                                                     |                                       |
| 20 |                               |     |                                                                                                                                                                                                                                                                                     |                                       |
| 21 | Dissemination policy          | 31a | Plans for investigators and sponsor to communicate trial results to participants, healthcare professionals, the public, and other relevant groups (eg, via publication, reporting in results databases, or other data sharing arrangements), including any publication restrictions | 16                                    |
| 22 |                               |     |                                                                                                                                                                                                                                                                                     |                                       |
| 23 |                               |     |                                                                                                                                                                                                                                                                                     |                                       |
| 24 |                               |     |                                                                                                                                                                                                                                                                                     |                                       |
| 25 |                               |     |                                                                                                                                                                                                                                                                                     |                                       |
| 26 |                               | 31b | Authorship eligibility guidelines and any intended use of professional writers                                                                                                                                                                                                      | None used                             |
| 27 |                               |     |                                                                                                                                                                                                                                                                                     |                                       |
| 28 |                               | 31c | Plans, if any, for granting public access to the full protocol, participant-level dataset, and statistical code                                                                                                                                                                     | 16                                    |
| 29 |                               |     |                                                                                                                                                                                                                                                                                     |                                       |
| 30 | <b>Appendices</b>             |     |                                                                                                                                                                                                                                                                                     |                                       |
| 31 |                               |     |                                                                                                                                                                                                                                                                                     |                                       |
| 32 | Informed consent materials    | 32  | Model consent form and other related documentation given to participants and authorised surrogates                                                                                                                                                                                  | HREC                                  |
| 33 |                               |     |                                                                                                                                                                                                                                                                                     |                                       |
| 34 |                               |     |                                                                                                                                                                                                                                                                                     |                                       |
| 35 | Biological specimens          | 33  | Plans for collection, laboratory evaluation, and storage of biological specimens for genetic or molecular analysis in the current trial and for future use in ancillary studies, if applicable                                                                                      | NA                                    |
| 36 |                               |     |                                                                                                                                                                                                                                                                                     |                                       |
| 37 |                               |     |                                                                                                                                                                                                                                                                                     |                                       |

38 \*It is strongly recommended that this checklist be read in conjunction with the SPIRIT 2013 Explanation & Elaboration for important clarification on the items.  
 39 Amendments to the protocol should be tracked and dated. The SPIRIT checklist is copyrighted by the SPIRIT Group under the Creative Commons  
 40 "[Attribution-NonCommercial-NoDerivs 3.0 Unported](https://creativecommons.org/licenses/by-nc-nd/3.0/)" license.  
 41



# BMJ Open

## Randomised Placebo Controlled Pilot/Feasibility Trial of the Management of Acute Sciatica (SCIATICA).

|                                 |                                                                                                                                                                                                                                                                                                                                                                                                                                              |
|---------------------------------|----------------------------------------------------------------------------------------------------------------------------------------------------------------------------------------------------------------------------------------------------------------------------------------------------------------------------------------------------------------------------------------------------------------------------------------------|
| Journal:                        | <i>BMJ Open</i>                                                                                                                                                                                                                                                                                                                                                                                                                              |
| Manuscript ID                   | bmjopen-2017-020435.R1                                                                                                                                                                                                                                                                                                                                                                                                                       |
| Article Type:                   | Protocol                                                                                                                                                                                                                                                                                                                                                                                                                                     |
| Date Submitted by the Author:   | 12-Feb-2018                                                                                                                                                                                                                                                                                                                                                                                                                                  |
| Complete List of Authors:       | Lassere, Marissa; St George Hospital, Rheumatology; University of New South Wales, School of Public Health and Community Medicine<br>Johnson, Kent; University of New South Wales, St George Clinical School, St George Hospital<br>Thom, Jeanette; University of New South Wales, School of Medical Sciences<br>Pickard, Grant; St George Hospital, Medical Assessment Unit<br>Smerdely, Peter; St George Hospital, Department of Aged Care |
| <b>Primary Subject Heading</b>: | Rheumatology                                                                                                                                                                                                                                                                                                                                                                                                                                 |
| Secondary Subject Heading:      | Emergency medicine, General practice / Family practice, Neurology, Radiology and imaging                                                                                                                                                                                                                                                                                                                                                     |
| Keywords:                       | sciatica, Neurosurgery < SURGERY, Adult orthopaedics < ORTHOPAEDIC & TRAUMA SURGERY, epidural steroid, radiculopathy, radicular pain                                                                                                                                                                                                                                                                                                         |
|                                 |                                                                                                                                                                                                                                                                                                                                                                                                                                              |

SCHOLARONE™  
Manuscripts

only

1  
2 **Title Page**

3 **Randomised Placebo Controlled Pilot/Feasibility Trial of the Management of Acute Sciatica**  
4 **(SCIATICA).**

5  
6 **Corresponding author**

7 Professor Marissa Nichole Lassere  
8 Rheumatology Department,  
9 St George Hospital  
10 Gray Street,  
11 Kogarah, 2217  
12 Australia  
13 Email: m.lassere@unsw.edu.au  
14 Telephone: +61291132139  
15

16  
17 **Co-authors**

18  
19 Dr Kent Robert Johnson  
20 St George Clinical School,  
21 University of NSW  
22 Kogarah  
23 Australia  
24

25  
26 Dr Jeanette Thom  
27 School of Medical Sciences  
28 University of NSW  
29 Kensington  
30 Australia  
31

32  
33 Dr Grant Pickard  
34 Medical Assessment Unit,  
35 St George Hospital  
36 Kogarah  
37 Australia  
38

39  
40 A/Professor Peter Smerdely  
41 Department of Aged Care, St George Hospital  
42 Kogarah  
43 Australia  
44

45  
46 **Word Count 8472**

47  
48 **Keywords**

49 Sciatica, lumbar-sacral radicular pain, lumbar-sacral radiculopathy, epidural steroids, randomised  
50 controlled trial, Oswestry Disability Index,  
51  
52  
53  
54  
55  
56  
57  
58  
59

## ABSTRACT

**Introduction:** Acute sciatica (symptom duration less than 4 weeks), a major cause of pain and disability, is a common presentation to medical practices and hospital emergency departments. Selective computed tomography (CT) fluoroscopy transforaminal epidural steroid injection (TESI) is often used with the hope of reducing pain and improving function. Recently, there has been interest in using systemic corticosteroids in acute sciatica. However, there is limited evidence to inform efficacy of selective CT fluoroscopy transforaminal epidural steroid in subacute and chronic sciatica and there is no evidence in acute sciatica, even though the practice is widespread. There is also limited evidence for the use of systemic corticosteroids in acute sciatica. Furthermore, the efficacy of selective CT fluoroscopy transforaminal epidural steroid versus systemic steroids has never been directly studied.

**Methods and Analysis:** SCIATICA is a pilot/feasibility study of patients with acute sciatica designed to evaluate the feasibility of undertaking a blinded 4-arm randomised controlled intervention study of (i) selective CT fluoroscopy transforaminal epidural steroid (Arm 1), (ii) selective CT fluoroscopy transforaminal epidural saline (Arm 2), (iii) 15 days tapering dose of oral steroids (Arm 3), and (iv) a sham epidural and oral placebo control (Arm 4). This feasibility study is designed to evaluate head-to-head, route versus pharmacology of interventions. The primary outcome measure is the Oswestry Disability Index (ODI) at 3 weeks. Secondary outcome is the ODI at 48 weeks. Other outcomes include numerical rating scale for leg pain, Pain Detect Questionnaire, quality of life, medication use, rescue procedures or surgery, and adverse events. Results of outcomes from this RCT will be used to determine the feasibility, sample size and power calculations for a large multicenter study.

**Ethics and dissemination:** The study has been approved by South Eastern Sydney Local Health District Human Research Ethics Committee (HREC/15/331/POHW/586). ClinicalTrials.Gov NCT03240783

## STRENGTHS AND LIMITATION OF THIS STUDY

- In the setting of acute sciatica (less than 4 weeks duration), this 4-arm trial evaluates the feasibility of undertaking a head-to-head route versus pharmacology of intervention randomised controlled trial by comparing epidural steroid with systemic steroids, and epidural steroid with epidural saline, and includes blinding with both oral placebo and sham injection across each arm. Such a trial directly provides risk versus benefit of interventions of interest.
- Evaluates feasibility of recruiting and protocol adherence of participants from different referral and demographic settings: public hospital inpatients, private hospital inpatients, emergency department presentations and general practitioner visits.
- Evaluates the challenge of recruiting participants to a RCT of acute sciatica where there often is an expectation of treatment benefit of a procedural intervention by health care professionals (and patients given frequent use of the internet for health care advice), because of a large placebo effect, the natural history of the condition, and extrapolation of results from case series or RCTs with different inclusion criteria, but where there is no direct RCT evidence of benefit and risk .

## INTRODUCTION

The colloquial definition of sciatica is pain in the buttock and leg and it is a term understood by the nonprofessional population. The anatomic pathology is usually caused by lumbosacral disc herniation and degenerative lumbosacral spondylosis involving the L2/3 to L5/S1 intervertebral discs and foramina.[1] Therefore sciatica can be associated with numbness, paraesthesia and weakness in the leg. The terms radicular pain and radiculopathy describe this neurological component of the pathology by health-care professionals and researchers.[2] Radicular pain is thought to arise from ectopic activation of nociceptive afferent fibres in a spinal nerve or its roots from ischaemia or inflammation.[3] Radiculopathy indicates that there is conduction block of the spinal nerve or its roots from either mechanical compression or ischaemia. Nonetheless, the terms are still used interchangeably and inconsistently in the randomised controlled trial (RCT) literature.[4],[5] This study defines the term sciatica as radicular pain with or without radiculopathy from lumbosacral nerve root pathology. The definition of acute sciatica in the RCT and systematic review literature also differs. It has been defined as less than 4 weeks, less than 6 weeks and less than 12 weeks duration. Subacute sciatica is usually between 6-12 weeks duration. Chronic sciatica is greater than 12 weeks duration. In this protocol symptoms less than 4 weeks duration are defined as acute.

The prevalence of lumbosacral radiculopathy has been estimated at 3% to 5%[6], whereas referred leg pain is much higher.[4] In an inception cohort of 1,172 patients with acute low back pain presenting to primary care settings in Australia, 25% had leg pain[7]. The majority of participants (72%) with acute sciatica recover completely by 12 months[7]. In another study, 50% of patients with acute sciatica recovered within 4 weeks. However, 30% had persistent leg pain and disability at 12 months[8].

Patients with acute sciatica are treated with a combination of paracetamol, opiate analgesia, non-steroidal anti-inflammatory drugs (NSAIDs)[9-11] pregabalin, and physiotherapy although a systematic review of pharmacologic therapy that included NSAIDs, opioid analgesics, antidepressants, anticonvulsants, muscle relaxants, and opioid analgesics, showed no effect or only small effects in acute, subacute and chronic sciatica[12]. Neuropathic symptom modifiers such as pregabalin have also recently been shown to be ineffective[13].

During the 1970s, failure of conservative management in sciatica and the desire to avoid surgery led to interventional procedures, including epidural steroid injections (ESI). There are three approaches for epidural steroid injections: caudal, interlaminar and transforaminal. The transforaminal approach deposits steroid directly near the ventral epidural space at the affected unilateral nerve root level. Evidence for the superiority of the selective transforaminal approach versus the caudal and interlaminar is generally indirect[14] as there are few high quality head-to-head studies[15]. Selective fluoroscopy (with or without computed tomography (CT) guided fluoroscopy) transforaminal epidural steroid injection (TESI) with local anaesthetic, colloquially described as a "spinal perineural steroid injection", is increasingly being used in the management of patients with acute sciatica in hospital and community settings in the absence of any RCTs undertaken to evaluate the benefit of this procedure in patients with acute sciatica. There are no Cochrane reviews on the management of acute sciatica with epidural steroids of any route[16]. In reviews of epidural steroid injections (caudal, laminar or transforaminal) in sciatica of any duration, not surprisingly, given the heterogeneity of patient populations, interventions, study design and study conduct, conclusions vary considerably. Two recent meta-analyses of epidural steroids in subacute and chronic sciatica [17],[14] conclude that treatment effects are small and of only short duration.

The first transforaminal approach RCT was published in 2000[18]. Five RCTs have been published[19-23] that have had low risk of bias from random sequence generation and participant and personnel blinding. These RCTs show considerable heterogeneity in study design. All RCTs

1  
2 except one required a symptom duration of at least 4 weeks prior to recruitment. No RCT used CT  
3 fluoroscopy. All but one RCT required magnetic resonance imaging (MRI) evidence of disc  
4 herniation[18] . Two studies excluded patients with evidence of foraminal stenosis [21 23]. Three  
5 studies did not report neurological features.[20],[22],[23] All studies included an epidural control,  
6 but only one study also included a non-epidural control[21]. Only two studies clearly specified the  
7 primary endpoint[21],[22], but these two studies had incomplete follow-up as they did not obtain  
8 further data on patients who failed to achieve a 50% reduction of pain 4 weeks after the last  
9 procedure. Where epidural saline was used as an epidural control, speculated mechanisms for a  
10 therapeutic effect include washout of inflammatory cytokines, lysis of inflammatory mediated  
11 adhesions and enhanced blood flow to ischaemic nerves.[21],  
12

13 Harms have been reported with transforaminal epidural steroid injections[24] including infection  
14 and bleeding. In 2014, the Food and Drug Administration (FDA) issued a letter of warning that  
15 injection of corticosteroids into the epidural space of the spine may result in rare, but serious  
16 adverse events, including "loss of vision, stroke, paralysis, and death." [25]. The risk is greater for  
17 particulate versus non-particulate steroids and in cervical versus lumbosacral epidurals. Recently a  
18 consensus opinion paper was published on safeguards to prevent neurologic complications after  
19 epidural steroid injections[26]. The clinical considerations were based on conventional fluoroscopy  
20 with contrast and not with CT fluoroscopy. RCTs show no difference in efficacy between  
21 particulate and non-particulate steroids[27-29].  
22

23  
24 Unlike epidural steroids, systemic steroids have been studied in acute as well as subacute sciatica. A  
25 meta-analysis of 7 small of studies of variable quality of intramuscular (IM), intravenous (IV) and  
26 oral steroids found steroids were not superior to placebo and had more adverse events[30]. Adverse  
27 events, however, were clearly related to the very high dose of dexamethasone used in 3 of the 7  
28 studies (120 mg of dexamethasone in 3 days which is the equivalent of 800mg of oral prednisone).  
29 In another systematic review[12] three studies of acute sciatica using smaller doses of steroid, a  
30 significant effect on short-term overall pain and leg pain was found. A RCT of IM steroid versus IM  
31 saline failed to show a difference in leg pain scores[21]. A blinded RCT reported that IV  
32 dexamethasone (8mg) improved pain scores at 24 hours and reduced ED length of stay compared to  
33 placebo. There was no difference at 6 weeks[31]. No CT/MRI imaging evidence was required. A  
34 recent blinded RCT of patients of oral steroids (prednisone 60mg 5 days, 40mg 5 days and 20mg 5  
35 days) with sciatica less than 12 weeks duration showed an improvement in function at 3 weeks and  
36 52 weeks but no improvement in pain[32].  
37

38  
39 In summary, there are two issues that are relevant that provides the rationale for this pilot/feasibility  
40 study (i) the condition under study i.e. acute, subacute or chronic sciatica, (ii) the route of  
41 interventional procedure (caudal, interlaminar and fluoroscopic transforaminal epidural (the last  
42 with or without CT guidance) or systemic route. There are no RCTs in acute sciatica published  
43 using steroid epidurals of any type. There are RCTs in acute sciatica with systemic steroids. In  
44 subacute and chronic sciatica there are no RCTs that have used selective CT fluoroscopy  
45 transformational steroid injection, indicative of the fast pace of changing technological procedural  
46 interventions without RCT evidence. Arguably, steroids may be more effective for sciatica when  
47 provided in the acute setting, but this should be subjected to rigorous evaluation. In Australia  
48 selective transforaminal epidural steroids is guided by computed tomography (CT) fluoroscopy,  
49 therefore is performed by interventional radiologists. Given their use and perceived effectiveness,  
50 and the costs and potential harms associated with their use, there is an identified need to properly  
51 evaluate the use of epidural and systemic steroids in acute sciatica in adequately controlled trial  
52 designs with a control arm for the route of procedure. Furthermore, given that there is a rationale  
53 for the benefit of epidural saline in acute sciatica, epidural steroid could be directly compared to  
54 epidural saline to evaluate pharmacology versus a simple physical washout of inflammatory  
55 cytokines, lysis of inflammatory mediated adhesions and enhanced blood flow to ischaemic nerves.  
56  
57  
58  
59

1 There is a clear advantage of directly comparing different interventions in a single randomised  
2 control trial. These advantages include improving internal validity, marginally reducing sample  
3 size, and limiting heterogeneity by standardising assessments and conduct procedures. However,  
4 there are also disadvantages such as longer time to trial recruitment, therefore longer time to trial  
5 completion, more exclusion criteria because of differing interventions, and difficulty explaining  
6 design to participants.  
7

## 8 **METHODS / ANALYSIS**

### 9 **Study Objectives**

#### 10 Primary objective

11 Undertake a pilot/feasibility study of patients with acute sciatica designed to evaluate the feasibility  
12 of a blinded 4-arm RCT of (i) selective CT fluoroscopy transforaminal epidural steroid (Arm 1),  
13 (ii) selective CT fluoroscopy transforaminal epidural saline (Arm 2), (iii) 15 days of a tapering  
14 dose of oral steroids (Arm 3), and (iv) a sham epidural and oral placebo control (Arm 4). This  
15 feasibility study is designed to evaluate head-to-head, route versus pharmacology of corticosteroid  
16 intervention by comparing epidural steroid with systemic steroids, and epidural steroid with  
17 epidural saline and includes blinding with oral placebo and sham injection across all arms. The  
18 primary outcome measure is the Oswestry Disability Index (ODI) at 3 weeks. The primary analysis  
19 is comparison of CT fluoroscopy guided transforaminal lumbar epidural steroid versus sham  
20 injection (Arm 1 versus Arm 4 in Figure 1. Study Design).  
21  
22  
23

24 The pilot/feasibility study will evaluate the following issues: rate of recruitment, study conduct  
25 including randomisation allocation concealment, preparation of interventions, choice of procedural  
26 corticosteroid and local anaesthetic, blinding, efficient organisation of initial assessments,  
27 diagnostic imaging, and ensuring efficient study processes across public/private hospital inpatients,  
28 emergency department /room (ED/R) presentations and general practice visits, and timeliness of  
29 providing the intervention within the 4 week acute sciatica requirement. Rate of recruitment is  
30 important particularly where there already is an expectation of treatment benefit “spinal perineural  
31 steroid injections” by health care professionals and patients.  
32  
33

34 This pilot/ feasibility study is a single centre Human Research Ethics Committee (HREC) study, but  
35 includes recruitment from multiple sources and the interventions will be delivered in public  
36 hospital, private hospital and community radiology practices. The recruitment of participants and  
37 the delivery of the interventions have been designed to identify feasibility issues given these  
38 different settings.  
39

#### 40 Secondary objectives

41 1. Obtain preliminary results from this RCT which will be used to calculate the sample size and  
42 power calculations for a full-scale study of treatments currently used in the management of acute  
43 lumbosacral radiculopathy of less than 4 weeks duration is the most effective in reducing pain and  
44 disability in the short-term and prevent progression to persistent or recurrent lumbosacral  
45 radiculopathy in the long term.

46 2. Evaluate the adequacy of outcome measures in acute sciatica, where pain, sensory and motor  
47 neurological symptoms all cause distress and disability, and where pain caused by nerve root  
48 irritation often progresses to loss of pain and may be replaced by sensory loss or weakness from  
49 nerve root conduction impairment. The importance of describing this multifactorial pathology and  
50 how it impacts the primary endpoint, the Oswestry Disability Index has substantive importance  
51 regarding the optimal primary and secondary endpoint for use in a full-scale RCT. Other outcome  
52 measures will also be evaluated such as confounding by medication use and taper, protocol  
53 compliance and burden, confounding by modification of activities and need and timing of rescue  
54 procedures.  
55  
56  
57  
58  
59  
60



3. Although this is a feasibility study, for transparency the following are the pre-specified hypotheses for powering a full-scale RCT. In patients with acute sciatica, selective CT fluoroscopy transforaminal lumbar epidural steroid (Arm 1) is (a) superior to control (Arm 4) and (b) non-inferior to a 15 day tapering dose of oral dexamethasone (Arm 3) in reducing short-term pain and disability (after 3 weeks) as determined by the Oswestry Disability Index. Further information regarding hypotheses and sample size is described in the sample size section.

### Participants, interventions and outcomes

The study setting is the rheumatology service at a large teaching hospital in Sydney, Australia. The teaching hospital services a population of about 1 million of Southern Sydney. The eligibility criteria are as follows:

#### Inclusion criteria

- (i) leg pain of any description with clinical findings consistent with single level radiculopathy,
- (ii) minimum symptom duration > 72hrs,
- (iii) maximum symptom duration < 3 weeks to ensure symptom duration at randomisation is < 4 weeks,
- (iv) no previous episode of same level radicular pain in the previous 6 months,
- (v) pain intensity at >30 on the Oswestry Disability Index (ODI),
- (vi) imaging (MRI and/or CT) indicating herniated disc or foraminal stenosis or both, concordant with the level indicated by history and physical examination,
- (vii) age at least 18 years

#### Exclusion criteria

- (i) previous transforaminal epidural steroids at any level in the last 12 months,
- (ii) previous oral steroids in the last 12 months,
- (iii) any lumbar surgery at same level, or above or below the level at any time,
- (iv) previous lumbar surgery at any other level to that in (iii) within the last 12 months,
- (v) pregnancy, or lactation/breastfeeding
- (vi) direct indication for neurosurgery (e.g. cauda equina syndrome, or progressive motor loss i.e.  $\leq 3/5$  power),
- (vii) inability to read or understand English
- (viii) any serious medical or psychiatric condition that may interfere with participation or outcome assessment such as: need for uninterrupted anti-coagulation, spinal fracture, active infection or metastatic disease suspected, active cancer, poorly controlled diabetes, or patients with diabetes on any insulin, uncontrolled hypertension (systolic blood pressure >180 or diastolic blood pressure >110 within 30 days of randomization date), active peptic ulcer disease, history of intolerance to steroid therapy, previous or current psychiatric history of bipolar disease, or secondary gain such as anticipated or ongoing legal proceedings, history of substance abuse
- (ix) no other pathology likely to explain condition (e.g Guillain-Barre Syndrome, vasculitis)

Both MRI and CT scan are acceptable for entry criteria. If CT is equivocal regarding pathology or level, then the patient will proceed to MRI, or the patient is not included in the study. Scans are performed without contrast. All potential participants will be reviewed by a study physician (rheumatologist) who will undertake a history and physical general, musculoskeletal and neurological examination to ensure inclusion and exclusion criteria and exclude 'red flags' and alternate diagnoses. Full laboratory examination of efficacy and safety includes full blood count (FBC), C-reactive protein (CRP), erythrocyte sedimentation rate (ESR), coagulation profile, electrolytes, urea, creatinine (EUC), liver function tests (LFTs), fasting blood glucose. Patients who

1 can cease antiplatelet and anticoagulant medications safely will be given instructions on how to do  
2 so, or are excluded. The CT and/or MRI images are reported by an experienced radiologist who is  
3 unaware of the study, and the results are discussed with the participant and their treating physician.  
4 If the report is unclear, the images are reviewed by an independent radiologist at a radiology  
5 meeting to clarify imaging pathology. If imaging pathology remains unclear then eligibility is not  
6 met. The images are also reviewed by the interventional radiologist prior to the procedure (see  
7 Implementation). If the interventional radiologist cannot confirm the specified imaging pathology  
8 the procedure is aborted and the principal investigator is contacted.  
9

## 11 **Interventions**

12 The interventions are as follows and also summarised in Table 1 and Figure 1.  
13

14 **Procedural interventions.** Once the specific spinal nerve pathology has been selected clinically  
15 and on imaging (e.g. right S1 nerve root at L5/S1 intervertebral space), all participants are given an  
16 injection of local anaesthetic (lignocaine or bupivacaine) into the skin and subcutaneous tissue at  
17 this selected site.  
18

19 Participants in Arm 1 will receive selective CT fluoroscopy transforaminal epidural dexamethasone  
20 4mg (1ml) a non-particulate corticosteroid with the local anaesthetic lignocaine 1% (1ml).  
21 However, if participants are an inpatient at St George Hospital they will receive betamethasone  
22 (1ml) as celestone chondrose 5.7mg/ml, a particulate corticosteroid with the local anaesthetic  
23 bupivacaine 0.5% (1ml). This is at the direction of two interventional radiology investigators who  
24 have differing preferences regarding procedural agents. The interventional radiologist and their  
25 preference is known and will be addressed in the hierarchical linear model analysis.  
26  
27

28 Participants in Arm 2 will receive selective CT fluoroscopy transforaminal epidural 0.9% normal  
29 saline (1ml) and lignocaine 1% (1 ml) unless they are hospital inpatients in which case they will  
30 receive bupivacaine 0.5% as the local anaesthetic agent. The saline epidural has two purposes in  
31 this pilot/feasibility study. There is no consensus in the literature regarding the optimal control for  
32 the evaluation of epidural steroids [33]. Moreover, there is some evidence that it has a therapeutic  
33 effect[21]. Therefore this pilot/feasibility study is designed to explore these issues by including  
34 both epidural saline arm (Arm 2) and a sham injection (Arms 3 and 4).  
35

36 Participants in Arms 3 and Arms 4 will receive sham selective CT fluoroscopy intramuscular  
37 injection with needle placement down to muscle layer and no injection of any fluid. The  
38 intervention is performed by an experienced interventional radiologist. The intervention radiologist  
39 is not blind to the procedure (see section Blinding, for more information).  
40

41 **Oral intervention.** The oral steroid is dexamethasone. The 15 day taper dosing is (i) 4 mg at 8am  
42 and 6pm days 1-5, (ii) 2 mg 8am and 6pm days 6-10, and (iii) 1mg 8am and 6pm days 11-15.  
43 Dexamethasone has a longer biological half-life than prednisolone. The oral interventions are over-  
44 encapsulated in gelatine capsules packed with sucrose and lactose. The placebo is sucrose and  
45 lactose only. Participants in Arm 3 receive the oral dexamethasone capsules, and participants in  
46 Arms 1, 2 and 4 receive the placebo capsules. Dexamethasone and placebo capsules have identical  
47 appearance and are prepared by a compounding pharmacist. The capsules are placed in three plastic  
48 bottles with clearly labelled instructions. At each telephone or in-person contact treatment  
49 adherence is monitored.  
50  
51

52 **Concomitant management and interventions:** All participants have concomitant usual care  
53 therapy as directed by the treating physician(s) with analgesics, NSAIDs, pregabalin and physical  
54 therapies. All concomitant therapy will be recorded at each visit. Rescue therapy includes CT  
55 fluoroscopy transforaminal epidural of steroid and neurosurgery.  
56  
57  
58  
59  
60

**Table 1: Summary of the experimental interventions by Arm**

| Arm                                                                                                                                                                                                                                                   | Experimental intervention                                                                                                                                                                                                                                                                                                                                                                                                                                                                                                                                                                                                                                                                                                                                                                                                                                           |
|-------------------------------------------------------------------------------------------------------------------------------------------------------------------------------------------------------------------------------------------------------|---------------------------------------------------------------------------------------------------------------------------------------------------------------------------------------------------------------------------------------------------------------------------------------------------------------------------------------------------------------------------------------------------------------------------------------------------------------------------------------------------------------------------------------------------------------------------------------------------------------------------------------------------------------------------------------------------------------------------------------------------------------------------------------------------------------------------------------------------------------------|
| <p><b>Arm 1<br/>Intervention 1</b></p> <p>Injectable Dexamethasone and Lignocaine OR Betamethasone and Bupivacaine selective CT fluoroscopy guided transforaminal lumbar epidural steroid</p>                                                         | <p><b>Drug: Betamethasone OR Dexamethasone Injectable</b></p> <p>Procedural agents.<br/>The steroid and local anaesthetic preparation is determined by interventional radiologist's preferences regarding the use of particulate or non-particulate steroids.<br/>Dexamethasone 4mg (1ml) is a non-particulate corticosteroid and is used with the local anaesthetic lignocaine 1% (1ml). Betamethasone Sodium Phosphate/Acetate 5.7 mg/ml Injectable is a particulate corticosteroid and is used with the local anaesthetic bupivacaine 0.5% (1ml). Other Name: celestone chondrase 5.7 mg/ml injectable suspension<br/>Other: Sham injection and/or oral placebo<br/>The sham Injection procedure is needle placement down to muscle at the designated spinal level and no injection of any fluid. The oral placebo is a gelatine capsule packed with filler.</p> |
| <p><b>Arm 2<br/>Intervention 2</b></p> <p>Normal Saline Flush, 0.9% Injectable Solution with either Bupivacaine or Lignocaine selective CT fluoroscopy guided transforaminal lumbar epidural normal saline</p>                                        | <p><b>Drug: Normal Saline Flush, 0.9% Injectable Solution</b></p> <p>Procedural agents.<br/>The local anaesthetic preparation used with the Normal Saline Flush, 0.9% Injectable Solution, will be standardized to replicate current radiology interventional practices: either local anaesthetic bupivacaine 0.5% (1ml) or local anaesthetic lignocaine 1% (1ml).<br/>Other: Sham injection and/or oral placebo<br/>The sham injection procedure is needle placement down to muscle at the designated spinal level and no injection of any fluid. The oral placebo is a gelatine capsule packed with filler.</p>                                                                                                                                                                                                                                                   |
| <p><b>Arm 3<br/>Intervention 3</b></p> <p>Dexamethasone oral capsule 15 day tapered dosing as follows: (i) days 1-5, 4 mg morning and evening, (ii) days 6-10, 2 mg morning and evening, and (iii) days 11-15, 1mg morning and evening.</p>           | <p><b>Drug: Dexamethasone Oral Tablet</b></p> <p>Dexamethasone Oral Tablet: 15 day taper dosing is: days 1-5 8mg (4mg morning and evening) , days 6-10 4 mg (2mg morning and evening), and days 11-15 2 mg (1mg morning and evening). The dexamethasone is over-encapsulated in a gelatine capsule that is identical to the placebo capsule in appearance.<br/>Other: Sham injection and/or oral placebo<br/>The sham Injection procedure is needle placement down to muscle at the designated spinal level and no injection of any fluid. The oral placebo is a gelatine capsule packed with filler.</p>                                                                                                                                                                                                                                                           |
| <p><b>Arm 4<br/>Control</b></p> <p>Sham injection and/or oral placebo: CT/ fluoroscopy guided (parameters set to zero) transforaminal lumbar sham (needle placement down to muscle and no injection of any fluid) AND placebo oral tablets taper.</p> | <p><b>Sham Injection and/or oral placebo</b></p> <p>The sham injection procedure is needle placement down to muscle at the designated spinal level and no injection of any fluid. The oral placebo is a gelatine capsule packed with filler.</p>                                                                                                                                                                                                                                                                                                                                                                                                                                                                                                                                                                                                                    |

## Outcomes

A recent publication on core outcomes domains for clinical trials in non-specific low back pain recommended physical functioning, pain intensity, and health-related quality of life [34].

Primary outcome measure.

*The Oswestry Disability Index (ODI) version 2.0* [35] is the primary outcome measure. The ODI is a functional status measure specifically developed for disorders of the spine and has been used in most RCTs of sciatica[36] and see Table 2. It is a 10-domain 2-page 5 minute questionnaire with ordered 6-response-item (0-5) scales for each question. The questions address domains of pain, physical functioning, sleeping, home/work functioning and impact on social life. The scores are summed, then doubled and the final score is 0-100. The ODI will be administered at Eligibility Baseline/Randomisation (day 0), day 1- 7, weeks 2, 3, 6, 12, 24, 48. This will be administered at visits, phone or mail. The primary analysis is the short-term outcome, reduction of disability at 3 weeks on the ODI. The secondary analysis is the long-term outcome, reduction of disability at 48 weeks on the ODI.

Secondary outcomes.

*Numerical Rating Scale (NRS) for leg pain* is the main secondary outcome. A measure of leg pain is included in all studies of sciatica. The NRS is a validated[37] 11 point scale. Participants will be asked to rate their average leg pain over the preceding 24 hours. Zero represents 'no leg pain' and 10 represents 'worst imaginable pain'. Although the Visual Analogue Scale (VAS) is a more frequently included measure, unlike the VAS, the NRS can be verbally administered by phone. This will be administered at Eligibility Baseline/Randomisation (day 0), day 1-7, weeks 2, 3, 6, 12, 24, 48.

*Numerical Rating Scale (NRS) for back pain.* The severity of back pain may differ to that of leg pain so both measures are needed. It is rated as an average over the preceding 24 hours and will be administered at Eligibility Baseline/Randomisation (day 0), day 1- 7, weeks 2, 3, 6, 12, 24, 48.

*Pain DETECT Questionnaire* [38]. At Eligibility Baseline/Randomisation (day 0), day 1- 7, weeks 2, 3, 6, 12, 24, 48.

*Short-Form 36 (SF-36) questionnaire* [39] evaluates health related quality of life and will be administered at Eligibility, Baseline/Randomisation (day 0), day 1, day 7, weeks 3, 6, 12, 24, 48.

*Lumbosacral and lower limb musculoskeletal and neurological history and clinical examination* at Eligibility, Baseline/Randomisation (day 0), day 1, day 7, weeks 3, 6, 12, 24, 48. This includes inspection of gait, lumbosacral spine and lower limbs for scoliosis, asymmetry, loss of lumbar lordosis, abnormal gait and stance, weakness, muscle wasting, muscle fasciculation, palpation of lumbosacral spine for tenderness and rigidity, movement of lumbosacral spine in flexion and extension, hip, knee and ankle range of movement, straight leg raise and femoral stretch test. Neurological examination of lower limb includes further inspection, examination for tone (normal, increased, decreased), clonus (present absent and beats of clonus if present), power (0, 1, 2, 3, 4, 4+ and 5 out of 5) for 12 lower limb movements (hip abduction, adduction, flexion, extension, knee flexion and extension, ankle dorsiflexion, plantar flexion, inversion and eversion, big toe extension and flexion) , knee and ankle reflexes (increased, normal, decreased absent), plantar reflexes (normal, up-going, equivocal, no response), and pinprick, light touch, proprioception and vibration sensory examination.

*Work and health utilisation measures* at Eligibility, Baseline/Randomisation (day 0), day 1, day 7, weeks 3, 6, 12, 24, 48. These will include days missed from paid employment (if applicable) because of sciatica, use of health services such as doctor, other health-care provider related visits (e.g. acupuncture, chiropractic), injection procedures and neurosurgery. This information will be obtained by interview at each visit and is documented in the case report form developed for the study.

*Demographic and socioeconomic measures* measured at baseline include age, gender, and occupation/previous occupation.

1 *Imaging findings on CT and /or MRI* will be used to define the site, level, type and degree of  
2 pathology using classification systems for disc herniation [40] and severity of nerve root  
3 compression [41]. This data will be used to determine imaging predictors of response.

4 *Medications:* use of all other medications including analgesics, NSAIDs, opiates, gabapentin and  
5 pregabalin will be documented at every visit.  
6

7  
8 *Economic evaluation:* Outcomes for an economic evaluation will also be collected in this feasibility  
9 study. A cost-effectiveness analysis will be undertaken using the ODI and a cost-utility analysis  
10 [42] using the EQ5D-5L for incremental costs per quality-adjusted-life-year (QALY)[43]. The  
11 EQ5D-5L questionnaire will be administered at Eligibility, Baseline/Randomisation (day 0), day 1,  
12 day 7, weeks 3, 6, 12, 24, 48. Work and health utilisation measures described above will also be  
13 collected. Costs within each randomised arm will be assessed in terms of hospital, health care visits,  
14 investigations, such as CT and MRI imaging, procedure costs and medications costs. These direct  
15 costs are determined with Diagnosis Related Groups cost weights for hospital in-patients, and for  
16 outpatients by the Australian Medical Benefits Scheme standard fees, and the Australian  
17 Pharmaceutical Benefits Scheme (PBS). These costs are determined by the Australian  
18 Pharmaceutical Benefits Advisory Committee (PBAC) Manual of Resources items and their  
19 associated costs used for economic analyses[44], [45]. The PBAC does not require questionnaires  
20 of productivity[44],[45] such as the PRODISQ[46] and similar questionnaires of resource  
21 utilization.[47]  
22

23 **Adverse events** will be collected at day 1, day 7, weeks 3, 6, 12, 24, 48. These will include steroid  
24 adverse effects (blood pressure, blood glucose, changes in mood and sleep) and procedural adverse  
25 effects (headaches, bleeding) and information about additional procedures, surgery and  
26 hospitalisations.  
27  
28  
29  
30  
31  
32  
33  
34  
35  
36  
37  
38  
39  
40  
41  
42  
43  
44  
45  
46  
47  
48  
49  
50  
51  
52  
53  
54  
55  
56  
57  
58  
59  
60

**Table 2: Schedule of enrolment, interventions and assessments**

|                                                                                 | STUDY PERIOD            |            |                 |       |    |        |      |     |    |     |     |           |
|---------------------------------------------------------------------------------|-------------------------|------------|-----------------|-------|----|--------|------|-----|----|-----|-----|-----------|
|                                                                                 | Screening & Eligibility | Allocation | Post allocation |       |    |        |      |     |    |     |     | Close-out |
|                                                                                 |                         |            | T1              | T2    | T3 | T4     | T5   | T6  | T7 | T8  | T9  |           |
| TIMEPOINT<br>D=Day W=Week                                                       | -T1                     | 0          | D1              | D 2-6 | D7 | D 8-15 | D14  | D21 | W6 | W12 | W24 | W48       |
| <b>ENROLMENT</b>                                                                |                         |            |                 |       |    |        |      |     |    |     |     |           |
| Eligibility Screen                                                              | ✓                       | ✓          |                 |       |    |        |      |     |    |     |     |           |
| Neurological and musculoskeletal Examination                                    | ✓                       | ✓          |                 |       |    |        |      |     |    |     |     |           |
| Safety Blood Tests                                                              | ✓                       | ✓          | ✓               |       | ✓  |        |      |     | ✓  |     |     |           |
| MRI (or CT if MRI contraindicated or CT clearly demonstrates imaging pathology) | ✓                       |            |                 |       |    |        |      |     |    |     |     |           |
| Oswestry Disability Index                                                       | ✓                       | ✓          |                 |       |    |        |      |     |    |     |     |           |
| Informed Consent                                                                | ✓                       |            |                 |       |    |        |      |     |    |     |     |           |
| Allocation                                                                      |                         | ✓          |                 |       |    |        |      |     |    |     |     |           |
| <b>INTERVENTIONS</b>                                                            |                         |            |                 |       |    |        |      |     |    |     |     |           |
| Procedural injection in radiology suite                                         |                         | X          |                 |       |    |        |      |     |    |     |     |           |
| Oral medications                                                                |                         | X          | X               | XXXX  | X  | XXXX   | XXXX |     |    |     |     |           |
| <b>ASSESSMENTS</b>                                                              |                         |            |                 |       |    |        |      |     |    |     |     |           |
| <b>Outcome Variables</b>                                                        |                         |            |                 |       |    |        |      |     |    |     |     |           |
| Oswestry Disability Index                                                       | ✓                       | ✓          | ✓               | ✓     | ✓  |        | ✓    | ✓   | ✓  | ✓   | ✓   | ✓         |
| Numerical Pain Rating Scales                                                    | ✓                       | ✓          | ✓               | ✓     | ✓  |        | ✓    | ✓   | ✓  | ✓   | ✓   | ✓         |
| PAIN DETECT Questionnaire                                                       | ✓                       | ✓          | ✓               |       | ✓  |        | ✓    | ✓   | ✓  | ✓   | ✓   | ✓         |
| SF-36                                                                           | ✓                       | ✓          |                 |       | ✓  |        | ✓    | ✓   | ✓  | ✓   | ✓   | ✓         |
| EQ-5D-5L                                                                        | ✓                       | ✓          | ✓               |       | ✓  |        | ✓    | ✓   | ✓  | ✓   | ✓   | ✓         |
| Work/health utilisation/costs                                                   | ✓                       | ✓          | ✓               |       | ✓  |        | ✓    | ✓   | ✓  | ✓   | ✓   | ✓         |
| Medication History                                                              | ✓                       | ✓          | ✓               | ✓     | ✓  |        | ✓    | ✓   | ✓  | ✓   | ✓   | ✓         |
| Neurological and musculoskeletal Examination                                    |                         |            | ✓               |       | ✓  |        |      | ✓   | ✓  | ✓   | ✓   | ✓         |
| Safety Blood Tests                                                              |                         |            | ✓               |       | ✓  |        |      |     |    |     |     |           |
| <b>Other Data variables</b>                                                     |                         |            |                 |       |    |        |      |     |    |     |     |           |
| Rescue procedure history                                                        |                         |            | ✓               |       | ✓  |        |      | ✓   | ✓  | ✓   | ✓   | ✓         |
| Participation Randomization perception                                          |                         |            | ✓               |       | ✓  |        |      | ✓   | ✓  | ✓   | ✓   | ✓         |
| Adverse Events & Serious Adverse Event Assessment                               |                         | ✓          | ✓               | ✓     | ✓  |        |      | ✓   | ✓  | ✓   | ✓   | ✓         |



### Sample size

Most trials of subacute and chronic sciatica of a selective CT fluoroscopy transforaminal epidural steroid injection have a sample size of 30 participants per arm. The primary outcome in this pilot/feasibility study is the ODI at 3 weeks comparing epidural steroid and sham injection (Arm 1 vs. Arm 4). With 15 participants per arm, there is 85% power to detect a difference of 17 ODI points between these two arms, given a standard deviation of change of ODI of 15.1 points[32]. Statistical test on which calculation is based is the independent two-sample t-test with a two-tailed alpha of 0.05 (Stata 14). This is a total of 60 participants in this pilot/feasibility study. This is sufficient to evaluate feasibility of the study design, study conduct and determine sample size for a full-scale multicentre study. However, this ODI difference is a large unrealistic effect. The minimum clinically important difference in ODI scores in one study was 7.0 points [48], and an international consensus group found empirical evidence of 4 to 15 ODI points[49] and recommended a cutoff value of 10 ODI points. Given that we are recruiting participants with acute sciatica of less than 4 weeks duration, an ODI difference of at least 10 ODI points is very reasonable. A sample size of 49 participants per arm will provide 90% power to detect a minimum clinically important difference of 10 ODI points assuming a standard deviation of 15.1 with a two-tailed alpha of 0.05 (Stata 14). Allowing for 20% dropout (which at 3 weeks is unlikely but at 48 weeks is more likely), 236 participants will be recruited, 59 to each arm. Although there are 6 possible comparisons in a 4 arm trial, controlling for type-1 error rate is not needed when several different experimental arms are compared with the control[50],[51]. Therefore no multiplicity adjustment is needed for: (i) Comparison I- Arm 1 versus Arm 4 (epidural steroid is superior to control), (ii) Comparison II - Arm 2 versus Arm 4 (epidural saline is superior to control), and Comparison III - Arm 3 versus Arm 4 (oral steroid is superior to control). However, in order to proceed to Comparison IV, Arm 1 versus Arm 3 (epidural steroid is superior to oral steroids), we must first demonstrate that Comparisons I and III were statistical significant, and there must be a type-1 error consideration[52]. Furthermore, if the hypothesis is that oral steroid is non-inferior to epidural steroids, then the ignorable difference must also be prespecified. The pilot/feasibility study will provide data that will be helpful in determining these sample size calculations. The feasibility study will be informative regarding the estimated mean difference in this population, its standard deviation, and pattern of missing data at each of the study visits.

### Recruitment processes

Participants will be recruited from (i) Emergency departments (EDs) of public hospitals, (ii) current inpatients of public and private hospitals and (iii) referral from community general practitioner or medical specialist (rheumatologist, neurosurgeon or orthopaedic surgeon) from the Sydney metropolitan area around St George Hospital. It is anticipated that the majority of participants will be recruited from emergency department presentations and general practitioners. Participants with sciatica symptoms less than 21 days duration are screened so that participants can be evaluated and undergo the allocated intervention within the 4 weeks eligibility criteria.

St George Hospital Emergency Department, as well GPs and relevant specialists in the geographic area (population approximately 270,000) serviced by this hospital area have been provided information about SCIATICA study, the inclusion/exclusion criteria, explanation of the trial rationale, and the opening of a daily acute sciatica clinic at St George Hospital centre as the portal of entry for trial patients.

Participants presenting to the Emergency Department (ED) with acute sciatica are assessed according to ED's usual procedures and staff admit or discharge patients according to their usual care pathway. If the ED does not admit a potential acute sciatica participant, a study clinician is contacted by phone Monday-Friday 9am to 5pm (business hours) and a referral is faxed. Out of business hours, a referral is faxed to the acute sciatica clinic which is processed the next business



1 day (see below). All referred participants are given a brochure by the referring ED clinician  
2 outlining the study. The acute sciatica clinic is also available for urgent referrals from community  
3 general practitioners and specialists. This is by fax or by telephone. These referred participants are  
4 also given a brochure by their referring clinician. All referred potential participants are logged.  
5 Within 1 to 3 days, Monday to Friday, all referred participants are contacted by telephone by a  
6 study clinician and a telephone history is obtained to ascertain suitability regarding inclusion and  
7 exclusion criteria. Where eligibility is clear or indeterminate, an eligibility visit is organised within  
8 the next couple of days. At this visit a full history and examination, musculoskeletal and  
9 neurological is conducted to determine underlying pathology, and if acute sciatica is likely, then  
10 lumbosacral imaging preferably with MRI imaging and blood pathology is requested. Patients  
11 complete routine clinical practice questionnaires as part of clinic audit including ODI, SF-36 and  
12 EQ-5D-5L. Conservative therapy is initiated (medication/physiotherapy) as appropriate. Potential  
13 participants are provided with the Participant Information and Consent Form and further  
14 information regarding the RCT if eligibility criteria are likely. Once imaging and pathology  
15 becomes available the participant is contacted and informed of the results. If s/he meets the criteria  
16 s/he is invited to participate in the RCT. At one of the visits prior to randomisation, all participants  
17 are reviewed by the principal investigator to ensure that all eligibility criteria are met. This includes  
18 a full general, musculoskeletal and neurological history and clinical examination and confirmation  
19 of imaging. If eligibility criteria are met and the participant agrees to participate, then the  
20 participant proceeds down study pathway. Processes are in place to ensure that enrolees, if they  
21 agree to participate, are safely fast-tracked to randomisation and RCT interventions.  
22  
23  
24

25 If patients do not agree to participate in the RCT they can either decide to continue their  
26 management in the acute sciatica clinic, and if their general practitioner is willing then the patient's  
27 ongoing management is determined by the rheumatologists who run the acute sciatica clinic. If the  
28 patient wishes to be managed by their GP, a letter from the acute sciatica clinic is sent to the GP to  
29 facilitate management. The patient has the option of returning to the acute sciatica clinic for further  
30 management or advice as needed. A log of potential participants who decline or are ineligible for  
31 any reason is kept for later evaluation consistent with Consolidated Standards of Reporting Trials  
32 (CONSORT) guidelines[53]. Reason for rejection or refusal will be recorded if available as well as  
33 age, gender, race/ethnicity and ODI score. If the participant does not wish to participate in the RCT  
34 but wish to be managed in the acute sciatica clinic they are included in a clinical audit of the  
35 management of acute sciatica. The management is determined in consultation with the patient and is  
36 generally conservative therapy unless there is severe pain and progressive functional disability  
37 preventing return to work or normal activities, progressive motor weakness, or features on the MRI  
38 imaging that suggests that neurosurgical review is needed.  
39  
40

41 The participant may clearly not meet the eligibility criteria at telephone screening. If patient safety  
42 is not an urgent consideration, patients who have anticipated or ongoing legal proceedings, need  
43 uninterrupted anti-coagulation or active cancer (as exclusion criteria) are not progressed to the  
44 eligibility visit but are asked to see or return to their treating doctor. Participants that do not have  
45 any leg pain are also asked to see or return to their treating doctor. However, if a referred patient  
46 has a history that suggests cauda equina syndrome or symptoms suggestive of malignant or  
47 infection-related pathology, the patient is seen urgently in the acute sciatica clinic and appropriate  
48 investigations and management are instituted.  
49  
50

51 If the participant does not wish to participate they are included in a clinical audit of the management  
52 of acute sciatica during the admission and the participant is continued to be managed according to  
53 the treating clinician. This is generally conservative therapy unless there is progressive severe pain  
54 and functional disability preventing discharge, progressive motor weakness, or features on the MRI  
55 imaging that suggests that neurosurgical review is needed.  
56  
57  
58  
59  
60

1 If the participant is admitted to hospital with acute sciatica the admitting team will contact the study  
2 investigators. Most patients with acute sciatica in our setting are either admitted under the general  
3 medical team, the rheumatology team or the neurosurgical team. The same processes are followed  
4 for in-patients as described above for out-patient referrals. Only a study investigator can consent a  
5 participant to participate in SCIATICA  
6

7  
8 All participants are told that participation is voluntary, they can discuss participation with family,  
9 friends or their health care practitioners, and if they decide not to participate, it will not affect the  
10 treatment they receive now or in the future. They can have family and friends with them during the  
11 consent process. They can also withdraw from the study once it has started, at any time without  
12 having to give a reason.  
13

#### 14 **Assignment of interventions**

15 Sequentially numbered, opaque and sealed envelopes contain the randomised intervention.  
16 Participants are randomly allocated 1:1:1:1 by computer-generated random numbers using permuted  
17 blocks stratified by duration of sciatica ( $\leq 2$  weeks,  $> 2$  weeks). The randomisation schedule  
18 including details of blocking schedule are held off-site by the randomised allocation sequence study  
19 investigator who is not involved in participant recruitment, assignment of interventions or data  
20 collection to ensure allocation concealment. This study investigator places the study medications  
21 and procedure instructions for each arm in separate opaque sealed envelopes. These two envelopes  
22 in turn are placed into a single larger opaque sealed envelope labelled with a sequential number and  
23 the randomisation number. The sealed envelopes are held in a locked cabinet until retrieved by the  
24 blinded study investigators who are involved in participant recruitment, provision of the study  
25 interventions, participant management and data collection. The acute sciatica clinic study  
26 investigators are blind to the study intervention.  
27  
28

#### 29 **Implementation of interventions**

30 The day of study intervention implementation, the participant has safety bloods performed, unless  
31 eligibility safety bloods had occurred in the previous week. The participant completes the study  
32 questionnaires and the study clinician once more ascertains eligibility criteria by history and  
33 examination immediately in the morning before attending the radiology suite. If the criteria are still  
34 met the study clinician indicates the exact site of the CT fluoroscopy transforaminal epidural on a  
35 request form that is provided to the interventional radiologist. For example, "perform a selective CT  
36 fluoroscopy transforaminal epidural of corticosteroid and local anaesthetic at L5/S1 targeting the  
37 right S1 nerve root". The MRI images are also provided to the interventional radiologist. The  
38 research officer retrieves the next in sequence numbered large opaque labelled sealed envelope. The  
39 research officer accompanies the participant, taking the interventional request, images (films or on  
40 CD) and large opaque labelled sealed envelope to the radiology suite. At the radiology suite the  
41 research officer opens sealed opaque envelope, gives the 'procedure' envelope with instructions to  
42 the radiologist and exits. The radiologist evaluates the MRI images, then opens the procedure  
43 envelope. It contains one of three instructions: (i) selective CT fluoroscopy transforaminal epidural  
44 steroid and local anaesthetic injection, (ii) selective CT fluoroscopy transforaminal epidural normal  
45 saline and local anaesthetic injection or (iii) intramuscular sham injection down to muscle layer but  
46 no injection of any fluid. The side (right or left) and lumbosacral level (e.g L5/S1) is determined by  
47 the radiology request form. The participant is positioned prone as per a CT fluoroscopy  
48 transforaminal epidural, the CT fluoroscope is positioned as if a CT fluoroscopy transforaminal  
49 epidural is performed, local anaesthetic is injected into the skin and subcutaneous tissue.  
50 Radiologist and his staff maintain patient blinding. CT/fluoroscopy guided transforaminal lumbar  
51 epidural radiation parameters are set to reduce radiation dose. There is no radiation dose for  
52 CT/fluoroscopy guided transforaminal lumbar sham injection because the parameters are set to zero  
53 although the machine is on. All CT fluoroscopy images are saved for further analysis.  
54  
55  
56  
57  
58  
59

1 At the end of the procedure once outside the CT fluoroscopy room, the research officer gives the  
2 opaque envelope marked “Dexamethasone or placebo capsules” to the participant and explains how  
3 the medications are to be taken over the next 15 days. There are three plastic bottles labelled Days  
4 1-5, Days 6-10 and Days 11-15. The participant opens the Day 1 labelled bottle and swallows the  
5 capsule. The participant continues to lie flat for at least one hour after the procedure, the participant  
6 is forbidden to drive for 24 hours and a person accompanies them home. The interventional  
7 radiology procedure report states that the participant had a procedure as part of the SCIATICA RCT  
8 and to contact the chief investigator if there is a concern, a phone number is provided.  
9  
10

### 11 **Masking/Blinding.**

12 All personnel except the radiologist delivering the procedure and the investigator responsible for  
13 randomisation and preparing the interventions will be blind to the randomisation arm. The trial  
14 participant, study clinicians, research officers, participant’s treating care providers, outcome  
15 assessors, and data analysts are blind to the intervention assignments. In the event of a serious  
16 medical emergency during which the treating doctor must know in which arm the participant was  
17 randomised, the randomised code can be broken. Each participant is given a 24 hour emergency  
18 contact number and the principal investigator contacts the investigator who holds the randomisation  
19 schedule to determine the participants allocated intervention.  
20  
21

### 22 **Data collection, management and analysis**

#### 23 **Data collection methods**

24 Data quality of outcome, baseline and other trial data is safeguarded with standardisation, assessor  
25 training and duplication of measurements and assessments by research officers administering the  
26 questionnaires and study clinicians undertaking the history and clinical examinations. All  
27 assessments are reviewed and the history and clinical findings confirmed by the principal  
28 investigator prior final eligibility determination. Study clinicians meet every 2 weeks to discuss  
29 ongoing assessments, issues of standardisation, equivocal or unclear findings and or any other  
30 concerns. All questionnaire data is scanned, with range checks for data values, and verified. Free  
31 text data scanned and verified. Clinical data is coded and verified. Participants’ retention and  
32 complete follow-up is encouraged through contact by phone or text and visits are organised so that  
33 they are maximally convenient for participants. This often requires visits to be conducted at the end  
34 of the normal working day.  
35  
36

#### 37 **Data/Statistical Analysis Plan**

38 Although this is a pilot/feasibility study to evaluate several important clinical and trial design  
39 considerations the following data analysis plan is proposed for transparency. Efficacy of treatment  
40 is analysed by intention-to-treat and the data analyst will be blind to arm allocation. A two-tailed p-  
41 value <0.05 is considered statistical significant. The primary analysis is an analysis of variance  
42 evaluating the effects of treatment on the ODI at week 3, using treatment arm, baseline ODI and  
43 duration of symptoms in days as covariates. The primary comparison is epidural steroid versus  
44 control. However, similar analyses will be applied to the other treatment comparisons with control  
45 (epidural saline versus control, oral steroid versus control) without a type-1 error penalty. However,  
46 the epidural steroid versus oral steroid comparison will require type-1 error consideration[52]. All  
47 comparisons are made at Day 21, where Day 0 is the day of the procedural intervention  
48 immediately followed by the first dose of the oral intervention. Day 21 is the 3 week endpoint.  
49  
50

51 Similar analyses will also be applied at the 6 and 48 week endpoints for the ODI. Multilevel linear  
52 mixed model will examine time trend by treatment arm interaction. This linear mixed model will be  
53 used to model ODI trajectory across all 10 time-points by treatment arm, where treatment arm is a  
54 property of the persons and visit is nested within person. The random-effects portion of the model  
55 specifies that months are a random effect. Analyses will be undertaken unadjusted and adjusted for  
56 medication use and other covariates. Missing data will be handled with multiple imputation, using  
57  
58  
59

1 iterative Markov chain Monte Carlo (MCMC) which requires the assumption that the data are  
2 missing at random[54]. An intention to treat analysis with multiple imputation is the primary  
3 analysis, however, a completers analysis will also be undertaken as a secondary analysis. The value  
4 of undertaking a feasibility study is that patterns and reasons of missing data that are not at random  
5 may be identified and in the full-scale study targeted efforts made to reduce this potential bias.  
6 There is no interim analysis.  
7

8  
9 Other outcome measures (NRSs, SF-36, EQ-5D and clinical data measured on a continuous scale)  
10 will also be analysed with multilevel mixed effects linear regression. All analyses will be  
11 undertaken unadjusted and adjusted for other medication use, type of procedural steroid, presence  
12 of neurological signs, and MRI findings with multivariate methods. A full description of  
13 neurological signs will be reported in tabular form and descriptive statistics. Safety data will be  
14 analysed in reported in tabular form and with descriptive statistics.  
15

### 16 17 **Economic Evaluation**

18 This feasibility study will provide data to identify issues conducting an economic evaluation for the  
19 full-scale study. The rationale for undertaking an economic evaluation is to evaluate the feasibility  
20 of undertaking a pre-specified cost-effectiveness economic evaluation in the full-scale study. In  
21 Australia, all drugs and more recently, certain procedures, undergo a cost-effectiveness analysis to  
22 determine whether they will be subsidised by the Australian government. This is usually performed  
23 from the perspective of the health-care sector rather than from the societal perspective[44]. We will  
24 be following these guidelines. In this pilot/feasibility study we will ascertain the feasibility of  
25 obtaining the outcome (including QALYs) and cost data in a valid manner, determine how much  
26 outcome and cost data are missing, and obtain estimates of mean and standard deviation of  
27 outcomes and costs. The Consolidated Health Economic Evaluation Reporting Standards  
28 (CHEERS)[42] statement checklist will also be followed to report the economic evaluation  
29 component in the full study.  
30  
31

32 In this pilot/feasibility study all participants in all study arms have concomitant usual care therapy  
33 as directed by the treating physician(s) with analgesics, NSAIDS, pregabalin and physical therapies.  
34 *Arm 4, the control arm, therefore is the usual care arm.* In this pilot/feasibility study the perspective  
35 of the health sector is undertaken using intention-to-treat. The incremental cost per ODI or QALY  
36 (based on EQ5D-L) will be estimated as the ratio of the difference in average cost and ODI or  
37 QALY between intervention arms for three comparisons: (i) epidural steroid vs. control, (ii) oral  
38 steroid vs. control, and (iii) epidural steroid vs. oral steroid. Missing data will be imputed with  
39 iterative Markov chain Monte Carlo methods. Sensitivity analyses will be performed by converting  
40 the SF-36 to SF-6D QALYs to compare QALYs, as well as other sensitivity analyses as  
41 recommended by CHEERS.  
42  
43

### 44 **ETHICS AND DISSEMINATION**

#### 45 **Ethics**

46 The study has been approved by South Eastern Sydney Local Health District Human Research  
47 Ethics Committee and is guided by a Data Safety and Monitoring Board and South Eastern Sydney  
48 Local Health District Human Research Ethics Executive (HREC15/331) Protocol version 3, 67  
49 April 2016. Any changes to the protocol are reported to this committee.  
50  
51

#### 52 **Data monitoring**

53 A data safety and monitoring committee (DSMC) will meet after the first 10 participants have been  
54 randomised to evaluate study conduct and safety. The DSMC will consist of the principal  
55 investigator (non-voting), a interventional radiologist, neurosurgeon, rheumatologist, and general  
56 physician. Adverse event monitoring and withdrawal of participants are discussed. The DSMC will  
57  
58  
59



1 meet every 4 months. The DSMC will be provided blinded data but unblinded data can be provided  
2 for a specific participant if requested by the committee. If requested it will be provided by an  
3 investigator who holds the randomisation schedule.  
4

### 5 **Harms**

6 CT fluoroscopy guided transforaminal lumbar epidural steroid (1 ml) and local anaesthetic (1ml) is  
7 used in the management of sciatica of all durations. The risks associated with this procedure  
8 include:  
9

10 *Dural puncture:* the needle penetrates into the sac encasing the nerves within the spinal canal,  
11 causing leakage of fluid contained within the sac, known as CSF (cerebrospinal fluid). The risk of  
12 this procedure is approximately 1% and is treated with flat bed rest for four hours.

13 *Infection:* most of these are minor (1-2%), however can be serious (<0.1%) requiring hospital  
14 admission, intravenous antibiotics and surgery.

15 *Bleeding:* this is rare although more common in patients with bleeding disorders and on “blood  
16 thinning” medication. Patients who cannot cease their medications will be excluded from the study  
17 (e.g. patients with mechanical heart valve, recent deep venous thrombosis and pulmonary embolus,  
18 recent cardiac stent). Otherwise, patients on warfarin have an INR and depending on the value will  
19 be asked to cease the warfarin 5 days prior to the procedure and an INR will be checked the day  
20 before the procedure and the value must be <1.5. Pradaxa (dabigatran) must be ceased 3 days prior  
21 to the procedure, aspirin and platelet inhibitors (plavix, iscover, ticlopidine, persantin) ceased 7  
22 days prior to the procedure, clexane cease 24 hours prior to the procedure. NSAIDs and COX2  
23 inhibitors do not need to be ceased.

24 *Nerve damage:* from direct needle trauma, or as a consequence of the above mentioned  
25 complications is rare.

26 *Stroke and spinal cord injury:* Most of the reported serious complications result from inadvertently  
27 injecting steroids with particulate matter into blood vessels close to the injection site, which can  
28 lead to brain or spinal cord injury. The risk of stroke or spinal cord damage from a transforaminal  
29 epidural steroid injection in the back is quite low when done under CT fluoroscopy.  
30  
31

32  
33 The risks of high dose short term oral corticosteroids are more common (10-20%) and include  
34 insomnia, nervousness, increased appetite, indigestion, headache. There are risks in patients with  
35 active peptic ulcer disease of perforation, worsening hypertension in patients with severe  
36 hypertension, and hyperglycemia in patients with poorly controlled diabetes or on insulin treatment.  
37 These patients are excluded from the trial. Patients who are on diet or oral hypoglycemic  
38 medications will be monitored with blood tests to minimise risk of significant hyperglycemia.  
39 However, these symptoms and abnormal blood tests will cease with stopping of treatment. There is  
40 no risk of suddenly stopping dexamethasone in this study as it is only being administered for 2  
41 weeks.  
42

43  
44 It is important that women participating in this study are not pregnant or lactating as the study CT  
45 scan fluoroscopy radiation, although small, is not zero, and dexamethasone is secreted in breast  
46 milk.  
47

48 An adverse event is any untoward medical occurrence in a participant which does not necessarily  
49 have a causal relationship with the study treatment. An adverse event can therefore be any  
50 unfavourable or unintended sign, symptom or condition and/or an observation that may or may not  
51 be related to the study treatment. A serious adverse event is any untoward medical occurrence that  
52 results in the following: death, is life-threatening, requires inpatient hospitalization or prolongation  
53 of existing hospitalization, persistent or significant disability/incapacity or congenital/birth defect,  
54 condition requiring unnecessary medical or surgical intervention. Solicited reporting of adverse  
55 events occurs Days 1 to 7, Weeks 3, 6, 12, 24, 48. Participants can also contact study investigators  
56  
57  
58  
59

1 at any time if they have any concerns. All adverse events are reported to the principal investigator  
2 and all serious adverse events are reported to the DMSC and Human Research Ethics Committee.  
3

#### 4 **Auditing**

5 A study meeting to audit trial conduct occurs fortnightly. There is no independent trial audit other  
6 than that provided by the DSMC and that required by the Human Research Ethics Committee.  
7

#### 8 **Access to Data and Dissemination**

9 The investigators have access to the final trial dataset. There are no contractual agreements limiting  
10 access. Study results of this trial will be submitted for publication in a peer-reviewed journal.  
11

12 Individual level data will be made available after the findings of the study have been published.

13 This data can be used for IPD meta-analyses or for further exploratory research. To obtain this data  
14 please contact Marissa Lassere.

15 The trial is registered on ClinicalTrials. Gov - NCT03240783  
16

#### 17 **ACKNOWLEDGEMENTS**

18 We would like to thank Dr Derek Glenn, Head, Department of Radiology St George Hospital,  
19 Kogarah for assisting with the information regarding radiation safety, Dr Carl Bryant, Bryant  
20 Radiology, St George Private Hospital for undertaking the interventional procedures and Ms Sue  
21 Baker for developing the case report forms, setting up the database and assisting with the ethics  
22 application, and Ms Jenny Gu for editing the case report forms.  
23

#### 24 **COMPETING INTERESTS STATEMENT**

25 There are no competing interests.  
26

#### 27 **AUTHORS' CONTRIBUTION**

28 Marissa Lassere conceived and designed the study. Marissa Lassere and Kent Johnson wrote the  
29 first draft of the protocol. Peter Smerdely, Grant Pickard and Jeanette Thom critically reviewed the  
30 protocol for important intellectual content and approved the final version.  
31

#### 32 **FUNDING STATEMENT.**

33 This work was supported by The St George and Sutherland Medical Research Foundation,  
34 development grant number 2016/13. <http://www.stgeorgemrf.com.au/2015/11/02/our-2016-grants/>  
35 The sponsor had no role in the study design of this protocol and will have no role in the collection,  
36 management, analysis, and interpretation of data; writing of the report; and the decision to submit  
37 the report for publication, or authority over any of these activities.  
38  
39  
40  
41  
42  
43

#### 44 **FIGURE LEGEND**

##### 45 **Figure 1. Study Flow Chart**

46  
47  
48  
49

#### 50 **FULL REFERENCES**

- 51
- 52 1. Koes BW, van Tulder MW, Peul WC. Diagnosis and treatment of sciatica. *BMJ*  
53 2007;**334**(7607):1313-7 doi: 10.1136/bmj.39223.428495.BE.
  - 54 2. Bogduk N. On the definitions and physiology of back pain, referred pain, and radicular pain. *Pain*  
55 2009;**147**(1-3):17-9 doi: 10.1016/j.pain.2009.08.020.  
56  
57  
58  
59



- 1  
2 3. Stafford MA, Peng P, Hill DA. Sciatica: a review of history, epidemiology, pathogenesis, and the  
3 role of epidural steroid injection in management. *Br J Anaesth* 2007;**99**(4):461-73 doi:  
4 10.1093/bja/aem238.
- 5 4. Valat JP, Genevay S, Marty M, et al. Sciatica. *Best Pract Res Clin Rheumatol* 2010;**24**(2):241-52  
6 doi: 10.1016/j.berh.2009.11.005.
- 7 5. Lin CW, Verwoerd AJ, Maher CG, et al. How is radiating leg pain defined in randomized  
8 controlled trials of conservative treatments in primary care? A systematic review. *Eur J Pain*  
9 2014;**18**(4):455-64 doi: 10.1002/j.1532-2149.2013.00384.x.
- 10 6. Tarulli AW, Raynor EM. Lumbosacral radiculopathy. *Neurol Clin* 2007;**25**(2):387-405 doi:  
11 10.1016/j.ncl.2007.01.008.
- 12 7. Henschke N, Maher CG, Refshauge KM, et al. Characteristics of patients with acute low back  
13 pain presenting to primary care in Australia. *Clin J Pain* 2009;**25**(1):5-11 doi:  
14 10.1097/AJP.0b013e3181817a8d.
- 15 8. Weber H, Holme I, Amlie E. The natural course of acute sciatica with nerve root symptoms in a  
16 double-blind placebo-controlled trial evaluating the effect of piroxicam. *Spine (Phila Pa*  
17 1976) 1993;**18**(11):1433-8
- 18 9. Rasmussen-Barr E, Held U, Grooten WJ, et al. Nonsteroidal Anti-inflammatory Drugs for  
19 Sciatica: An Updated Cochrane Review. *Spine (Phila Pa 1976)* 2017;**42**(8):586-94 doi:  
20 10.1097/BRS.0000000000002092.
- 21 10. Rasmussen-Barr E, Held U, Grooten WJ, et al. Non-steroidal anti-inflammatory drugs for  
22 sciatica. *Cochrane Database of Systematic Reviews* 2016;**10**:CD012382
- 23 11. Rasmussen-Barr E, Held U, Grooten WJ, et al. Nonsteroidal Anti-inflammatory Drugs for  
24 Sciatica: An Updated Cochrane Review. *Spine (Phila Pa 1976)* 2017;**42**(8):586-94
- 25 12. Pinto RZ, Maher CG, Ferreira ML, et al. Drugs for relief of pain in patients with sciatica:  
26 systematic review and meta-analysis. *BMJ* 2012;**344**:e497 doi: 10.1136/bmj.e497.
- 27 13. Mathieson S, Maher CG, McLachlan AJ, et al. Trial of Pregabalin for Acute and Chronic  
28 Sciatica. *N Engl J Med* 2017;**376**(12):1111-20 doi: 10.1056/NEJMoa1614292.
- 29 14. Pinto RZ, Maher CG, Ferreira ML, et al. Epidural corticosteroid injections in the management  
30 of sciatica: a systematic review and meta-analysis. *Ann Intern Med* 2012;**157**(12):865-77
- 31 15. Chang-Chien GC, Knezevic NN, McCormick Z, et al. Transforaminal versus interlaminar  
32 approaches to epidural steroid injections: a systematic review of comparative studies for  
33 lumbosacral radicular pain. *Pain Physician* 2014;**17**(4):E509-24
- 34 16. Staal JB, de Bie R, de Vet HC, et al. Injection therapy for subacute and chronic low-back pain.  
35 *Cochrane Database of Systematic Reviews* 2008(3):CD001824
- 36 17. Bhatia A, Flamer D, Shah PS, et al. Transforaminal Epidural Steroid Injections for Treating  
37 Lumbosacral Radicular Pain from Herniated Intervertebral Discs: A Systematic Review and  
38 Meta-Analysis. *Anesth Analg* 2016;**122**(3):857-70 doi: 10.1213/ANE.0000000000001155.
- 39 18. Riew KD, Yin Y, Gilula L, et al. The effect of nerve-root injections on the need for operative  
40 treatment of lumbar radicular pain. A prospective, randomized, controlled, double-blind  
41 study. *J Bone Joint Surg Am* 2000;**82-A**(11):1589-93
- 42 19. Karppinen J, Malmivaara A, Kurunlahti M, et al. Periradicular infiltration for sciatica: a  
43 randomized controlled trial. *Spine (Phila Pa 1976)* 2001;**26**(9):1059-67
- 44 20. Tafazal S, Ng L, Chaudhary N, et al. Corticosteroids in peri-radicular infiltration for radicular  
45 pain: a randomised double blind controlled trial. One year results and subgroup analysis. *Eur*  
46 *Spine J* 2009;**18**(8):1220-5 doi: 10.1007/s00586-009-1000-2.
- 47 21. Ghahreman A, Ferch R, Bogduk N. The efficacy of transforaminal injection of steroids for the  
48 treatment of lumbar radicular pain. *Pain Med* 2010;**11**(8):1149-68 doi: 10.1111/j.1526-  
49 4637.2010.00908.x.
- 50 22. Cohen SP, White RL, Kurihara C, et al. Epidural steroids, etanercept, or saline in subacute  
51 sciatica: a multicenter, randomized trial. *Ann Intern Med* 2012;**156**(8):551-9 doi:  
52 10.7326/0003-4819-156-8-201204170-00002.
- 53  
54  
55  
56  
57  
58  
59

23. Manchikanti L, Cash KA, Pampati V, et al. Transforaminal epidural injections in chronic lumbar disc herniation: a randomized, double-blind, active-control trial. *Pain Physician* 2014;**17**(4):E489-501
24. Epstein NE. The risks of epidural and transforaminal steroid injections in the Spine: Commentary and a comprehensive review of the literature. *Surg Neurol Int* 2013;**4**(Suppl 2):S74-93 doi: 10.4103/2152-7806.109446.
25. Manchikanti L, Candido KD, Singh V, et al. Epidural steroid warning controversy still dogging FDA. *Pain Physician* 2014;**17**(4):E451-74
26. Rathmell JP, Benzon HT, Dreyfuss P, et al. Safeguards to prevent neurologic complications after epidural steroid injections: consensus opinions from a multidisciplinary working group and national organizations. *Anesthesiology* 2015;**122**(5):974-84 doi: 10.1097/ALN.0000000000000614.
27. El-Yahouchi C, Geske JR, Carter RE, et al. The noninferiority of the nonparticulate steroid dexamethasone vs the particulate steroids betamethasone and triamcinolone in lumbar transforaminal epidural steroid injections. *Pain Med* 2013;**14**(11):1650-7 doi: 10.1111/pme.12214.
28. Kennedy DJ, Plastaras C, Casey E, et al. Comparative effectiveness of lumbar transforaminal epidural steroid injections with particulate versus nonparticulate corticosteroids for lumbar radicular pain due to intervertebral disc herniation: a prospective, randomized, double-blind trial. *Pain Med* 2014;**15**(4):548-55 doi: 10.1111/pme.12325.
29. Denis I, Claveau G, Filiatrault M, et al. Randomized Double-Blind Controlled Trial Comparing the Effectiveness of Lumbar Transforaminal Epidural Injections of Particulate and Nonparticulate Corticosteroids for Lumbosacral Radicular Pain. *Pain Med* 2015 doi: 10.1111/pme.12846.
30. Roncoroni C, Baillet A, Durand M, et al. Efficacy and tolerance of systemic steroids in sciatica: a systematic review and meta-analysis. *Rheumatology (Oxford)* 2011;**50**(9):1603-11 doi: 10.1093/rheumatology/ker151.
31. Balakrishnamoorthy R, Horgan I, Perez S, et al. Does a single dose of intravenous dexamethasone reduce Symptoms in Emergency department patients with low Back pain and RADiculopathy (SEBRA)? A double-blind randomised controlled trial. *Emerg Med J* 2015;**32**(7):525-30 doi: 10.1136/emered-2013-203490.
32. Goldberg H, Firtch W, Tyburski M, et al. Oral steroids for acute radiculopathy due to a herniated lumbar disk: a randomized clinical trial. *JAMA* 2015;**313**(19):1915-23 doi: 10.1001/jama.2015.4468.
33. Chou R, Hashimoto R, Friedly J, et al. Epidural Corticosteroid Injections for Radiculopathy and Spinal Stenosis: A Systematic Review and Meta-analysis. *Ann Intern Med* 2015;**163**(5):373-81 doi: 10.7326/M15-0934.
34. Chiarotto A, Deyo RA, Terwee CB, et al. Core outcome domains for clinical trials in non-specific low back pain. *Eur Spine J* 2015;**24**(6):1127-42 doi: 10.1007/s00586-015-3892-3.
35. Fairbank JC, Pynsent PB. The Oswestry Disability Index. *Spine (Phila Pa 1976)* 2000;**25**(22):2940-52; discussion 52
36. Guzman JZ, Cutler HS, Connolly J, et al. Patient-Reported Outcome Instruments in Spine Surgery. *Spine (Phila Pa 1976)* 2016;**41**(5):429-37 doi: 10.1097/BRS.0000000000001211.
37. Williamson A, Hoggart B. Pain: a review of three commonly used pain rating scales. *J Clin Nurs* 2005;**14**(7):798-804 doi: 10.1111/j.1365-2702.2005.01121.x.
38. Shaygan M, Boger A, Kroner-Herwig B. Clinical features of chronic pain with neuropathic characteristics: a symptom-based assessment using the pain DETECT questionnaire. *Eur J Pain* 2013;**17**(10):1529-38 doi: 10.1002/j.1532-2149.2013.00322.x.
39. Ware JEa. SF-36 Health Survey : manual and interpretation guide. 1993, Boston: The Health Institute, New England Medical Cente. 1993
40. Fardon DF, Milette PC, Combined Task Forces of the North American Spine Society ASoSR, et al. Nomenclature and classification of lumbar disc pathology. Recommendations of the

- 1 Combined task Forces of the North American Spine Society, American Society of Spine  
2 Radiology, and American Society of Neuroradiology. *Spine* (Phila Pa 1976)  
3 2001;**26**(5):E93-E113
- 4
- 5 41. Pfirmann CW, Dora C, Schmid MR, et al. MR image-based grading of lumbar nerve root  
6 compromise due to disk herniation: reliability study with surgical correlation. *Radiology*  
7 2004;**230**(2):583-8 doi: 10.1148/radiol.2302021289.
- 8 42. Husereau D, Drummond M, Petrou S, et al. Consolidated Health Economic Evaluation  
9 Reporting Standards (CHEERS) statement. *BMJ* 2013;**346**:f1049 doi: 10.1136/bmj.f1049.
- 10 43. Dolan P. Modeling valuations for EuroQol health states. *Med Care* 1997;**35**(11):1095-108
- 11 44. Commonwealth of Australia as represented by the Department of Health. Guidelines for  
12 preparing a submission to the Pharmaceutical Benefits Advisory Committee (Version 5.0).  
13 <https://pbacpbsgovau/content/information/files/pbac-guidelines-version-5pdf> 2016
- 14 45. Manual of resource items and their associated unit costs. For use in submissions to the  
15 Pharmaceutical Benefits Advisory Committee involving economic analyses Version 5.0  
16 Secondary Manual of resource items and their associated unit costs. For use in submissions  
17 to the Pharmaceutical Benefits Advisory Committee involving economic analyses Version  
18 5.0 2016.
- 19
- 20 46. Koopmanschap MA. PRODISQ: a modular questionnaire on productivity and disease for  
21 economic evaluation studies. *Expert Rev Pharmacoecon Outcomes Res* 2005;**5**(1):23-8 doi:  
22 10.1586/14737167.5.1.23.
- 23 47. Leggett LE, Khadaroo RG, Holroyd-Leduc J, et al. Measuring Resource Utilization: A  
24 Systematic Review of Validated Self-Reported Questionnaires. *Medicine* (Baltimore)  
25 2016;**95**(10):e2759 doi: 10.1097/MD.0000000000002759.
- 26 48. Lauridsen HH, Hartvigsen J, Manniche C, et al. Responsiveness and minimal clinically  
27 important difference for pain and disability instruments in low back pain patients. *BMC*  
28 *Musculoskelet Disord* 2006;**7**:82 doi: 10.1186/1471-2474-7-82.
- 29 49. Ostelo RW, Deyo RA, Stratford P, et al. Interpreting change scores for pain and functional  
30 status in low back pain: towards international consensus regarding minimal important  
31 change. *Spine* (Phila Pa 1976) 2008;**33**(1):90-4 doi: 10.1097/BRS.0b013e31815e3a10.
- 32 50. Proschan MA, Waclawiw MA. Practical guidelines for multiplicity adjustment in clinical trials.  
33 *Control Clin Trials* 2000;**21**(6):527-39
- 34 51. Wason JM, Stecher L, Mander AP. Correcting for multiple-testing in multi-arm trials: is it  
35 necessary and is it done? *Trials* 2014;**15**:364 doi: 10.1186/1745-6215-15-364.
- 36 52. Bender R, Lange S. Adjusting for multiple testing--when and how? *J Clin Epidemiol*  
37 2001;**54**(4):343-9
- 38 53. <http://www.consort-statement.org/>. Secondary <http://www.consort-statement.org/>.
- 39 54. White IR, Horton NJ, Carpenter J, et al. Strategy for intention to treat analysis in randomised  
40 trials with missing outcome data. *BMJ* 2011;**342**:d40 doi: 10.1136/bmj.d40.
- 41  
42  
43  
44  
45  
46  
47  
48  
49  
50  
51  
52  
53  
54  
55  
56  
57  
58  
59

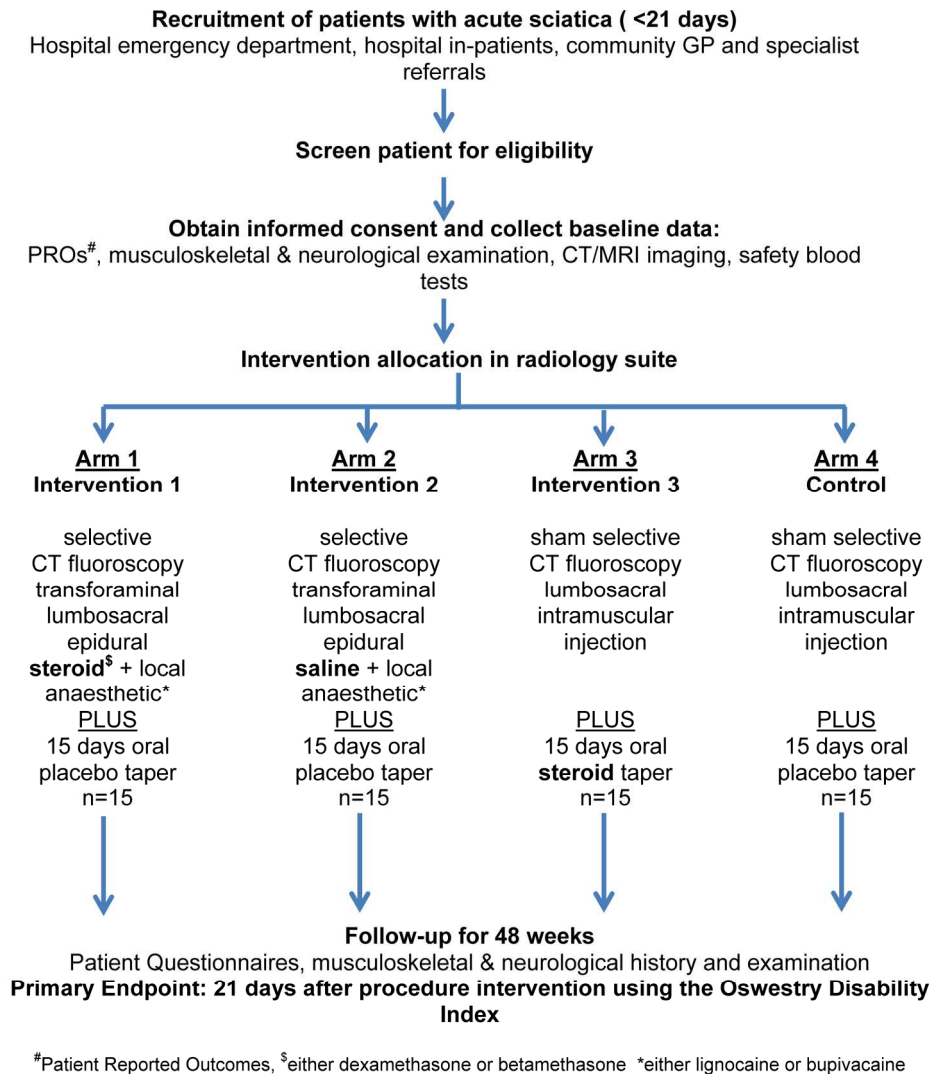

Figure 1. Study Flow Chart

171x184mm (300 x 300 DPI)

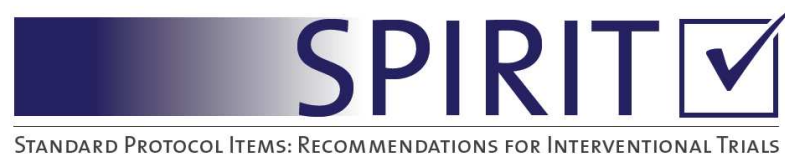

SPIRIT 2013 Checklist: Recommended items to address in a clinical trial protocol and related documents\*

| Section/item                      | Item No | Description                                                                                                                                                                                                                                                                              | Addressed on page number |
|-----------------------------------|---------|------------------------------------------------------------------------------------------------------------------------------------------------------------------------------------------------------------------------------------------------------------------------------------------|--------------------------|
| <b>Administrative information</b> |         |                                                                                                                                                                                                                                                                                          |                          |
| Title                             | 1       | Descriptive title identifying the study design, population, interventions, and, if applicable, trial acronym                                                                                                                                                                             | 1                        |
| Trial registration                | 2a      | Trial identifier and registry name. If not yet registered, name of intended registry                                                                                                                                                                                                     | 2                        |
|                                   | 2b      | All items from the World Health Organization Trial Registration Data Set                                                                                                                                                                                                                 |                          |
| Protocol version                  | 3       | Date and version identifier                                                                                                                                                                                                                                                              | 15                       |
| Funding                           | 4       | Sources and types of financial, material, and other support                                                                                                                                                                                                                              | 18                       |
| Roles and responsibilities        | 5a      | Names, affiliations, and roles of protocol contributors                                                                                                                                                                                                                                  | 1, 18                    |
|                                   | 5b      | Name and contact information for the trial sponsor                                                                                                                                                                                                                                       | 18                       |
|                                   | 5c      | Role of study sponsor and funders, if any, in study design; collection, management, analysis, and interpretation of data; writing of the report; and the decision to submit the report for publication, including whether they will have ultimate authority over any of these activities | 18                       |
|                                   | 5d      | Composition, roles, and responsibilities of the coordinating centre, steering committee, endpoint adjudication committee, data management team, and other individuals or groups overseeing the trial, if applicable (see Item 21a for data monitoring committee)                         | 16                       |

## Introduction

|                          |    |                                                                                                                                                                                                           |          |
|--------------------------|----|-----------------------------------------------------------------------------------------------------------------------------------------------------------------------------------------------------------|----------|
| Background and rationale | 6a | Description of research question and justification for undertaking the trial, including summary of relevant studies (published and unpublished) examining benefits and harms for each intervention        | 3-4      |
|                          | 6b | Explanation for choice of comparators                                                                                                                                                                     | 3-4, 7-8 |
| Objectives               | 7  | Specific objectives or hypotheses                                                                                                                                                                         | 5        |
| Trial design             | 8  | Description of trial design including type of trial (eg, parallel group, crossover, factorial, single group), allocation ratio, and framework (eg, superiority, equivalence, noninferiority, exploratory) | 7,12     |

## Methods: Participants, interventions, and outcomes

|                      |     |                                                                                                                                                                                                                                                                                                                                                                                |       |
|----------------------|-----|--------------------------------------------------------------------------------------------------------------------------------------------------------------------------------------------------------------------------------------------------------------------------------------------------------------------------------------------------------------------------------|-------|
| Study setting        | 9   | Description of study settings (eg, community clinic, academic hospital) and list of countries where data will be collected. Reference to where list of study sites can be obtained                                                                                                                                                                                             | 12,13 |
| Eligibility criteria | 10  | Inclusion and exclusion criteria for participants. If applicable, eligibility criteria for study centres and individuals who will perform the interventions (eg, surgeons, psychotherapists)                                                                                                                                                                                   | 6     |
| Interventions        | 11a | Interventions for each group with sufficient detail to allow replication, including how and when they will be administered                                                                                                                                                                                                                                                     | 7-8   |
|                      | 11b | Criteria for discontinuing or modifying allocated interventions for a given trial participant (eg, drug dose change in response to harms, participant request, or improving/worsening disease)                                                                                                                                                                                 | 17,18 |
|                      | 11c | Strategies to improve adherence to intervention protocols, and any procedures for monitoring adherence (eg, drug tablet return, laboratory tests)                                                                                                                                                                                                                              | 12,13 |
|                      | 11d | Relevant concomitant care and interventions that are permitted or prohibited during the trial                                                                                                                                                                                                                                                                                  | 7     |
| Outcomes             | 12  | Primary, secondary, and other outcomes, including the specific measurement variable (eg, systolic blood pressure), analysis metric (eg, change from baseline, final value, time to event), method of aggregation (eg, median, proportion), and time point for each outcome. Explanation of the clinical relevance of chosen efficacy and harm outcomes is strongly recommended | 9-10  |
| Participant timeline | 13  | Time schedule of enrolment, interventions (including any run-ins and washouts), assessments, and visits for participants. A schematic diagram is highly recommended (see Figure)                                                                                                                                                                                               | 11    |



|   |             |    |                                                                                                                                                                                       |       |
|---|-------------|----|---------------------------------------------------------------------------------------------------------------------------------------------------------------------------------------|-------|
| 1 |             |    |                                                                                                                                                                                       |       |
| 2 |             |    |                                                                                                                                                                                       |       |
| 3 | Sample size | 14 | Estimated number of participants needed to achieve study objectives and how it was determined, including clinical and statistical assumptions supporting any sample size calculations | 12    |
| 4 |             |    |                                                                                                                                                                                       |       |
| 5 | Recruitment | 15 | Strategies for achieving adequate participant enrolment to reach target sample size                                                                                                   | 12,13 |
| 6 |             |    |                                                                                                                                                                                       |       |
| 7 |             |    |                                                                                                                                                                                       |       |

### 8 **Methods: Assignment of interventions (for controlled trials)**

#### 9 Allocation:

|    |                                  |     |                                                                                                                                                                                                                                                                                                                                                          |       |
|----|----------------------------------|-----|----------------------------------------------------------------------------------------------------------------------------------------------------------------------------------------------------------------------------------------------------------------------------------------------------------------------------------------------------------|-------|
| 10 |                                  |     |                                                                                                                                                                                                                                                                                                                                                          |       |
| 11 |                                  |     |                                                                                                                                                                                                                                                                                                                                                          |       |
| 12 | Sequence generation              | 16a | Method of generating the allocation sequence (eg, computer-generated random numbers), and list of any factors for stratification. To reduce predictability of a random sequence, details of any planned restriction (eg, blocking) should be provided in a separate document that is unavailable to those who enrol participants or assign interventions | 14    |
| 13 |                                  |     |                                                                                                                                                                                                                                                                                                                                                          |       |
| 14 |                                  |     |                                                                                                                                                                                                                                                                                                                                                          |       |
| 15 |                                  |     |                                                                                                                                                                                                                                                                                                                                                          |       |
| 16 |                                  |     |                                                                                                                                                                                                                                                                                                                                                          |       |
| 17 | Allocation concealment mechanism | 16b | Mechanism of implementing the allocation sequence (eg, central telephone; sequentially numbered, opaque, sealed envelopes), describing any steps to conceal the sequence until interventions are assigned                                                                                                                                                | 12-14 |
| 18 |                                  |     |                                                                                                                                                                                                                                                                                                                                                          |       |
| 19 |                                  |     |                                                                                                                                                                                                                                                                                                                                                          |       |
| 20 |                                  |     |                                                                                                                                                                                                                                                                                                                                                          |       |
| 21 | Implementation                   | 16c | Who will generate the allocation sequence, who will enrol participants, and who will assign participants to interventions                                                                                                                                                                                                                                | 14    |
| 22 |                                  |     |                                                                                                                                                                                                                                                                                                                                                          |       |
| 23 |                                  |     |                                                                                                                                                                                                                                                                                                                                                          |       |
| 24 | Blinding (masking)               | 17a | Who will be blinded after assignment to interventions (eg, trial participants, care providers, outcome assessors, data analysts), and how                                                                                                                                                                                                                | 15    |
| 25 |                                  |     |                                                                                                                                                                                                                                                                                                                                                          |       |
| 26 |                                  |     |                                                                                                                                                                                                                                                                                                                                                          |       |
| 27 |                                  | 17b | If blinded, circumstances under which unblinding is permissible, and procedure for revealing a participant's allocated intervention during the trial                                                                                                                                                                                                     | 15    |
| 28 |                                  |     |                                                                                                                                                                                                                                                                                                                                                          |       |
| 29 |                                  |     |                                                                                                                                                                                                                                                                                                                                                          |       |
| 30 |                                  |     |                                                                                                                                                                                                                                                                                                                                                          |       |

### 31 **Methods: Data collection, management, and analysis**

|    |                         |     |                                                                                                                                                                                                                                                                                                                                                                                                              |            |
|----|-------------------------|-----|--------------------------------------------------------------------------------------------------------------------------------------------------------------------------------------------------------------------------------------------------------------------------------------------------------------------------------------------------------------------------------------------------------------|------------|
| 32 |                         |     |                                                                                                                                                                                                                                                                                                                                                                                                              |            |
| 33 | Data collection methods | 18a | Plans for assessment and collection of outcome, baseline, and other trial data, including any related processes to promote data quality (eg, duplicate measurements, training of assessors) and a description of study instruments (eg, questionnaires, laboratory tests) along with their reliability and validity, if known. Reference to where data collection forms can be found, if not in the protocol | 9,10,11,15 |
| 34 |                         |     |                                                                                                                                                                                                                                                                                                                                                                                                              |            |
| 35 |                         |     |                                                                                                                                                                                                                                                                                                                                                                                                              |            |
| 36 |                         |     |                                                                                                                                                                                                                                                                                                                                                                                                              |            |
| 37 |                         |     |                                                                                                                                                                                                                                                                                                                                                                                                              |            |
| 38 |                         | 18b | Plans to promote participant retention and complete follow-up, including list of any outcome data to be collected for participants who discontinue or deviate from intervention protocols                                                                                                                                                                                                                    | 13         |
| 39 |                         |     |                                                                                                                                                                                                                                                                                                                                                                                                              |            |
| 40 |                         |     |                                                                                                                                                                                                                                                                                                                                                                                                              |            |
| 41 |                         |     |                                                                                                                                                                                                                                                                                                                                                                                                              |            |
| 42 |                         |     |                                                                                                                                                                                                                                                                                                                                                                                                              |            |
| 43 |                         |     |                                                                                                                                                                                                                                                                                                                                                                                                              |            |
| 44 |                         |     |                                                                                                                                                                                                                                                                                                                                                                                                              |            |
| 45 |                         |     |                                                                                                                                                                                                                                                                                                                                                                                                              |            |
| 46 |                         |     |                                                                                                                                                                                                                                                                                                                                                                                                              |            |
| 47 |                         |     |                                                                                                                                                                                                                                                                                                                                                                                                              |            |

|    |                                 |     |                                                                                                                                                                                                                                                                                                                                       |                  |
|----|---------------------------------|-----|---------------------------------------------------------------------------------------------------------------------------------------------------------------------------------------------------------------------------------------------------------------------------------------------------------------------------------------|------------------|
| 1  |                                 |     |                                                                                                                                                                                                                                                                                                                                       |                  |
| 2  |                                 |     |                                                                                                                                                                                                                                                                                                                                       |                  |
| 3  | Data management                 | 19  | Plans for data entry, coding, security, and storage, including any related processes to promote data quality (eg, double data entry; range checks for data values). Reference to where details of data management procedures can be found, if not in the protocol                                                                     | In HREC protocol |
| 4  |                                 |     |                                                                                                                                                                                                                                                                                                                                       |                  |
| 5  |                                 |     |                                                                                                                                                                                                                                                                                                                                       |                  |
| 6  |                                 |     |                                                                                                                                                                                                                                                                                                                                       |                  |
| 7  | Statistical methods             | 20a | Statistical methods for analysing primary and secondary outcomes. Reference to where other details of the statistical analysis plan can be found, if not in the protocol                                                                                                                                                              | 15-16            |
| 8  |                                 |     |                                                                                                                                                                                                                                                                                                                                       |                  |
| 9  |                                 |     |                                                                                                                                                                                                                                                                                                                                       |                  |
| 10 |                                 | 20b | Methods for any additional analyses (eg, subgroup and adjusted analyses)                                                                                                                                                                                                                                                              | 15-16            |
| 11 |                                 |     |                                                                                                                                                                                                                                                                                                                                       |                  |
| 12 |                                 | 20c | Definition of analysis population relating to protocol non-adherence (eg, as randomised analysis), and any statistical methods to handle missing data (eg, multiple imputation)                                                                                                                                                       | 15-16            |
| 13 |                                 |     |                                                                                                                                                                                                                                                                                                                                       |                  |
| 14 |                                 |     |                                                                                                                                                                                                                                                                                                                                       |                  |
| 15 | <b>Methods: Monitoring</b>      |     |                                                                                                                                                                                                                                                                                                                                       |                  |
| 16 |                                 |     |                                                                                                                                                                                                                                                                                                                                       |                  |
| 17 | Data monitoring                 | 21a | Composition of data monitoring committee (DMC); summary of its role and reporting structure; statement of whether it is independent from the sponsor and competing interests; and reference to where further details about its charter can be found, if not in the protocol. Alternatively, an explanation of why a DMC is not needed | 16,17            |
| 18 |                                 |     |                                                                                                                                                                                                                                                                                                                                       |                  |
| 19 |                                 |     |                                                                                                                                                                                                                                                                                                                                       |                  |
| 20 |                                 |     |                                                                                                                                                                                                                                                                                                                                       |                  |
| 21 |                                 |     |                                                                                                                                                                                                                                                                                                                                       |                  |
| 22 |                                 | 21b | Description of any interim analyses and stopping guidelines, including who will have access to these interim results and make the final decision to terminate the trial                                                                                                                                                               | 15-16            |
| 23 |                                 |     |                                                                                                                                                                                                                                                                                                                                       |                  |
| 24 |                                 |     |                                                                                                                                                                                                                                                                                                                                       |                  |
| 25 | Harms                           | 22  | Plans for collecting, assessing, reporting, and managing solicited and spontaneously reported adverse events and other unintended effects of trial interventions or trial conduct                                                                                                                                                     | 10,17            |
| 26 |                                 |     |                                                                                                                                                                                                                                                                                                                                       |                  |
| 27 |                                 |     |                                                                                                                                                                                                                                                                                                                                       |                  |
| 28 | Auditing                        | 23  | Frequency and procedures for auditing trial conduct, if any, and whether the process will be independent from investigators and the sponsor                                                                                                                                                                                           | 18               |
| 29 |                                 |     |                                                                                                                                                                                                                                                                                                                                       |                  |
| 30 |                                 |     |                                                                                                                                                                                                                                                                                                                                       |                  |
| 31 |                                 |     |                                                                                                                                                                                                                                                                                                                                       |                  |
| 32 | <b>Ethics and dissemination</b> |     |                                                                                                                                                                                                                                                                                                                                       |                  |
| 33 |                                 |     |                                                                                                                                                                                                                                                                                                                                       |                  |
| 34 | Research ethics approval        | 24  | Plans for seeking research ethics committee/institutional review board (REC/IRB) approval                                                                                                                                                                                                                                             | approved         |
| 35 |                                 |     |                                                                                                                                                                                                                                                                                                                                       |                  |
| 36 |                                 |     |                                                                                                                                                                                                                                                                                                                                       |                  |
| 37 | Protocol amendments             | 25  | Plans for communicating important protocol modifications (eg, changes to eligibility criteria, outcomes, analyses) to relevant parties (eg, investigators, REC/IRBs, trial participants, trial registries, journals, regulators)                                                                                                      | 16               |
| 38 |                                 |     |                                                                                                                                                                                                                                                                                                                                       |                  |
| 39 |                                 |     |                                                                                                                                                                                                                                                                                                                                       |                  |
| 40 |                                 |     |                                                                                                                                                                                                                                                                                                                                       |                  |
| 41 |                                 |     |                                                                                                                                                                                                                                                                                                                                       |                  |
| 42 |                                 |     |                                                                                                                                                                                                                                                                                                                                       |                  |
| 43 |                                 |     |                                                                                                                                                                                                                                                                                                                                       |                  |
| 44 |                                 |     |                                                                                                                                                                                                                                                                                                                                       |                  |
| 45 |                                 |     |                                                                                                                                                                                                                                                                                                                                       |                  |
| 46 |                                 |     |                                                                                                                                                                                                                                                                                                                                       |                  |
| 47 |                                 |     |                                                                                                                                                                                                                                                                                                                                       |                  |

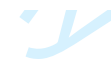

|    |                               |     |                                                                                                                                                                                                                                                                                     |                                       |
|----|-------------------------------|-----|-------------------------------------------------------------------------------------------------------------------------------------------------------------------------------------------------------------------------------------------------------------------------------------|---------------------------------------|
| 1  |                               |     |                                                                                                                                                                                                                                                                                     |                                       |
| 2  |                               |     |                                                                                                                                                                                                                                                                                     |                                       |
| 3  | Consent or assent             | 26a | Who will obtain informed consent or assent from potential trial participants or authorised surrogates, and how (see Item 32)                                                                                                                                                        | 12,13                                 |
| 4  |                               |     |                                                                                                                                                                                                                                                                                     |                                       |
| 5  |                               |     |                                                                                                                                                                                                                                                                                     |                                       |
| 6  |                               | 26b | Additional consent provisions for collection and use of participant data and biological specimens in ancillary studies, if applicable                                                                                                                                               | NA                                    |
| 7  |                               |     |                                                                                                                                                                                                                                                                                     |                                       |
| 8  | Confidentiality               | 27  | How personal information about potential and enrolled participants will be collected, shared, and maintained in order to protect confidentiality before, during, and after the trial                                                                                                | IN HREC protocol                      |
| 9  |                               |     |                                                                                                                                                                                                                                                                                     |                                       |
| 10 |                               |     |                                                                                                                                                                                                                                                                                     |                                       |
| 11 | Declaration of interests      | 28  | Financial and other competing interests for principal investigators for the overall trial and each study site                                                                                                                                                                       | 18                                    |
| 12 |                               |     |                                                                                                                                                                                                                                                                                     |                                       |
| 13 |                               |     |                                                                                                                                                                                                                                                                                     |                                       |
| 14 | Access to data                | 29  | Statement of who will have access to the final trial dataset, and disclosure of contractual agreements that limit such access for investigators                                                                                                                                     | 18                                    |
| 15 |                               |     |                                                                                                                                                                                                                                                                                     |                                       |
| 16 |                               |     |                                                                                                                                                                                                                                                                                     |                                       |
| 17 | Ancillary and post-trial care | 30  | Provisions, if any, for ancillary and post-trial care, and for compensation to those who suffer harm from trial participation                                                                                                                                                       | In patient consent/HREC documentation |
| 18 |                               |     |                                                                                                                                                                                                                                                                                     |                                       |
| 19 |                               |     |                                                                                                                                                                                                                                                                                     |                                       |
| 20 |                               |     |                                                                                                                                                                                                                                                                                     |                                       |
| 21 | Dissemination policy          | 31a | Plans for investigators and sponsor to communicate trial results to participants, healthcare professionals, the public, and other relevant groups (eg, via publication, reporting in results databases, or other data sharing arrangements), including any publication restrictions | 18                                    |
| 22 |                               |     |                                                                                                                                                                                                                                                                                     |                                       |
| 23 |                               |     |                                                                                                                                                                                                                                                                                     |                                       |
| 24 |                               |     |                                                                                                                                                                                                                                                                                     |                                       |
| 25 |                               |     |                                                                                                                                                                                                                                                                                     |                                       |
| 26 |                               | 31b | Authorship eligibility guidelines and any intended use of professional writers                                                                                                                                                                                                      | None used                             |
| 27 |                               |     |                                                                                                                                                                                                                                                                                     |                                       |
| 28 |                               | 31c | Plans, if any, for granting public access to the full protocol, participant-level dataset, and statistical code                                                                                                                                                                     | 18                                    |
| 29 |                               |     |                                                                                                                                                                                                                                                                                     |                                       |
| 30 | <b>Appendices</b>             |     |                                                                                                                                                                                                                                                                                     |                                       |
| 31 |                               |     |                                                                                                                                                                                                                                                                                     |                                       |
| 32 | Informed consent materials    | 32  | Model consent form and other related documentation given to participants and authorised surrogates                                                                                                                                                                                  | HREC                                  |
| 33 |                               |     |                                                                                                                                                                                                                                                                                     |                                       |
| 34 |                               |     |                                                                                                                                                                                                                                                                                     |                                       |
| 35 | Biological specimens          | 33  | Plans for collection, laboratory evaluation, and storage of biological specimens for genetic or molecular analysis in the current trial and for future use in ancillary studies, if applicable                                                                                      | NA                                    |
| 36 |                               |     |                                                                                                                                                                                                                                                                                     |                                       |
| 37 |                               |     |                                                                                                                                                                                                                                                                                     |                                       |

\*It is strongly recommended that this checklist be read in conjunction with the SPIRIT 2013 Explanation & Elaboration for important clarification on the items. Amendments to the protocol should be tracked and dated. The SPIRIT checklist is copyrighted by the SPIRIT Group under the Creative Commons "[Attribution-NonCommercial-NoDerivs 3.0 Unported](https://creativecommons.org/licenses/by-nc-nd/3.0/)" license.

# BMJ Open

## Randomised Placebo Controlled Pilot Trial of the Management of Acute Sciatica (SCIATICA): A Feasibility Study

|                                 |                                                                                                                                                                                                                                                                                                                                                                                                                                              |
|---------------------------------|----------------------------------------------------------------------------------------------------------------------------------------------------------------------------------------------------------------------------------------------------------------------------------------------------------------------------------------------------------------------------------------------------------------------------------------------|
| Journal:                        | <i>BMJ Open</i>                                                                                                                                                                                                                                                                                                                                                                                                                              |
| Manuscript ID                   | bmjopen-2017-020435.R2                                                                                                                                                                                                                                                                                                                                                                                                                       |
| Article Type:                   | Protocol                                                                                                                                                                                                                                                                                                                                                                                                                                     |
| Date Submitted by the Author:   | 23-Mar-2018                                                                                                                                                                                                                                                                                                                                                                                                                                  |
| Complete List of Authors:       | Lassere, Marissa; St George Hospital, Rheumatology; University of New South Wales, School of Public Health and Community Medicine<br>Johnson, Kent; University of New South Wales, St George Clinical School, St George Hospital<br>Thom, Jeanette; University of New South Wales, School of Medical Sciences<br>Pickard, Grant; St George Hospital, Medical Assessment Unit<br>Smerdely, Peter; St George Hospital, Department of Aged Care |
| <b>Primary Subject Heading</b>: | Rheumatology                                                                                                                                                                                                                                                                                                                                                                                                                                 |
| Secondary Subject Heading:      | Emergency medicine, General practice / Family practice, Neurology, Radiology and imaging                                                                                                                                                                                                                                                                                                                                                     |
| Keywords:                       | sciatica, Neurosurgery < SURGERY, Adult orthopaedics < ORTHOPAEDIC & TRAUMA SURGERY, epidural steroid, radiculopathy, radicular pain                                                                                                                                                                                                                                                                                                         |
|                                 |                                                                                                                                                                                                                                                                                                                                                                                                                                              |

SCHOLARONE™  
Manuscripts

**Title Page****Randomised Placebo Controlled Pilot Trial of the Management of Acute Sciatica (SCIATICA): A Feasibility Study****Corresponding author**

Professor Marissa Nichole Lassere  
Rheumatology Department,  
St George Hospital  
Gray Street,  
Kogarah, 2217  
Australia  
Email: m.lassere@unsw.edu.au  
Telephone: +61291132139

**Co-authors**

Dr Kent Robert Johnson  
St George Clinical School,  
University of NSW  
Kogarah  
Australia

Dr Jeanette Thom  
School of Medical Sciences  
University of NSW  
Kensington  
Australia

Dr Grant Pickard  
Medical Assessment Unit,  
St George Hospital  
Kogarah  
Australia

Professor Peter Smerdely  
Department of Aged Care, St George Hospital  
Kogarah  
Australia

**Word Count** 8684**Keywords**

Sciatica, lumbar-sacral radicular pain, lumbar-sacral radiculopathy, epidural steroids, randomised controlled trial, Oswestry Disability Index,

## ABSTRACT

**Introduction:** Acute sciatica (symptom duration less than 4 weeks), a major cause of pain and disability, is a common presentation to medical practices and hospital emergency departments. Selective computed tomography (CT) fluoroscopy transforaminal epidural steroid injection (TESI) is often used with the hope of reducing pain and improving function. Recently, there has been interest in using systemic corticosteroids in acute sciatica. However, there is limited evidence to inform management of selective CT fluoroscopy transforaminal epidural steroid in subacute and chronic sciatica and there is no evidence in acute sciatica, even though the practice is widespread. There is also limited evidence for the use of systemic corticosteroids in acute sciatica. Furthermore, the management of selective CT fluoroscopy transforaminal epidural steroid versus systemic steroids has never been directly studied.

**Methods and Analysis:** SCIATICA is a pilot/feasibility study of patients with acute sciatica designed to evaluate the feasibility of undertaking a blinded 4-arm randomised controlled intervention study of (i) selective CT fluoroscopy transforaminal epidural steroid (Arm 1), (ii) selective CT fluoroscopy transforaminal epidural saline (Arm 2), (iii) 15 days tapering dose of oral steroids (Arm 3), and (iv) a sham epidural and oral placebo control (Arm 4). This feasibility study is designed to evaluate head-to-head, route versus pharmacology of interventions. The primary outcome measure is the Oswestry Disability Index (ODI) at 3 weeks. Secondary outcome is the ODI at 48 weeks. Other outcomes include numerical rating scale for leg pain, Pain Detect Questionnaire, quality of life, medication use, rescue procedures or surgery, and adverse events. Results of outcomes from this RCT will be used to determine the feasibility, sample size and power calculations for a large multicenter study.

**Ethics and dissemination:** The study has been approved by South Eastern Sydney Local Health District Human Research Ethics Committee (HREC/15/331/POHW/586). ClinicalTrials.Gov NCT03240783

## STRENGTHS AND LIMITATION OF THIS STUDY

- In the setting of acute sciatica (less than 4 weeks duration), this 4-arm trial evaluates the feasibility of undertaking a head-to-head route versus pharmacology of intervention randomised controlled trial by comparing epidural steroid with systemic steroids, and epidural steroid with epidural saline, and includes blinding with both oral placebo and sham injection across each arm. Such a trial directly provides risk versus benefit of interventions of interest.
- Evaluates feasibility of recruiting and protocol adherence of participants from different referral and demographic settings: public hospital inpatients, private hospital inpatients, emergency department presentations and general practitioner visits.
- Evaluates the challenge of recruiting participants to a RCT of acute sciatica where there often is an expectation of treatment benefit of a procedural intervention by health care professionals (and patients given frequent use of the internet for health care advice), because of a large placebo effect, the natural history of the condition, and extrapolation of results from case series or RCTs with different inclusion criteria, but where there is no direct RCT evidence of benefit and risk.



## INTRODUCTION

The colloquial definition of sciatica is pain in the buttock and leg and it is a term understood by the nonprofessional population. The anatomic pathology is usually caused by lumbosacral disc herniation and degenerative lumbosacral spondylosis involving the L2/3 to L5/S1 intervertebral discs and foramina.[1] Therefore sciatica can be associated with numbness, paraesthesia and weakness in the leg. The terms radicular pain and radiculopathy describe this neurological component of the pathology by health-care professionals and researchers.[2] Radicular pain is thought to arise from ectopic activation of nociceptive afferent fibres in a spinal nerve or its roots from ischaemia or inflammation.[3] Radiculopathy indicates that there is conduction block of the spinal nerve or its roots from either mechanical compression or ischaemia. Nonetheless, the terms are still used interchangeably and inconsistently in the randomised controlled trial (RCT) literature.[4],[5] This study defines the term sciatica as radicular pain with or without radiculopathy from lumbosacral nerve root pathology. The definition of acute sciatica in the RCT and systematic review literature also differs. It has been defined as less than 4 weeks, less than 6 weeks and less than 12 weeks duration. Subacute sciatica is usually between 6-12 weeks duration. Chronic sciatica is greater than 12 weeks duration. In this protocol symptoms less than 4 weeks duration are defined as acute.

The prevalence of lumbosacral radiculopathy has been estimated at 3% to 5%[6], whereas referred leg pain is much higher.[4] In an inception cohort of 1,172 patients with acute low back pain presenting to primary care settings in Australia, 25% had leg pain[7]. The majority of participants (72%) with acute sciatica recover completely by 12 months[7]. In another study, 50% of patients with acute sciatica recovered within 4 weeks. However, 30% had persistent leg pain and disability at 12 months[8].

Patients with acute sciatica are treated with a combination of paracetamol, opiate analgesia, non-steroidal anti-inflammatory drugs (NSAIDs)[9-11] pregabalin, and physiotherapy although a systematic review of pharmacologic therapy that included NSAIDs, opioid analgesics, antidepressants, anticonvulsants, muscle relaxants, and opioid analgesics, showed no effect or only small effects in acute, subacute and chronic sciatica[12]. Neuropathic symptom modifiers such as pregabalin have also recently been shown to be ineffective[13].

During the 1970s, failure of conservative management in sciatica and the desire to avoid surgery led to interventional procedures, including epidural steroid injections (ESI). There are three approaches for epidural steroid injections: caudal, interlaminar and transforaminal. The transforaminal approach deposits steroid directly near the ventral epidural space at the affected unilateral nerve root level. Evidence for the superiority of the selective transforaminal approach versus the caudal and interlaminar is generally indirect[14] as there are few high quality head-to-head studies[15]. Selective fluoroscopy (with or without computed tomography (CT) guided fluoroscopy) transforaminal epidural steroid injection (TESI) with local anaesthetic, colloquially described as a "spinal perineural steroid injection", is increasingly being used in the management of patients with acute sciatica in hospital and community settings in the absence of any RCTs undertaken to evaluate the benefit of this procedure in patients with acute sciatica. There are no Cochrane reviews on the management of acute sciatica with epidural steroids of any route[16]. In reviews of epidural steroid injections (caudal, laminar or transforaminal) in sciatica of any duration, not surprisingly, given the heterogeneity of patient populations, interventions, study design and study conduct, conclusions vary considerably. Two recent meta-analyses of epidural steroids in subacute and chronic sciatica [17],[14] conclude that treatment effects are small and of only short duration.

The first transforaminal approach RCT was published in 2000[18]. Five RCTs have been published[19-23] that have had low risk of bias from random sequence generation and participant and personnel blinding. These RCTs show considerable heterogeneity in study design. All RCTs

1  
2 except one required a symptom duration of at least 4 weeks prior to recruitment. No RCT used CT  
3 fluoroscopy. All but one RCT required magnetic resonance imaging (MRI) evidence of disc  
4 herniation[18] . Two studies excluded patients with evidence of foraminal stenosis [21 23]. Three  
5 studies did not report neurological features.[20],[22],[23] All studies included an epidural control,  
6 but only one study also included a non-epidural control[21]. Only two studies clearly specified the  
7 primary endpoint[21],[22], but these two studies had incomplete follow-up as they did not obtain  
8 further data on patients who failed to achieve a 50% reduction of pain 4 weeks after the last  
9 procedure. Where epidural saline was used as an epidural control, speculated mechanisms for a  
10 therapeutic effect include washout of inflammatory cytokines, lysis of inflammatory mediated  
11 adhesions and enhanced blood flow to ischaemic nerves.[21],  
12

13 Harms have been reported with transforaminal epidural steroid injections[24] including infection  
14 and bleeding. In 2014, the Food and Drug Administration (FDA) issued a letter of warning that  
15 injection of corticosteroids into the epidural space of the spine may result in rare, but serious  
16 adverse events, including "loss of vision, stroke, paralysis, and death." [25]. The risk is greater for  
17 particulate versus non-particulate steroids and in cervical versus lumbosacral epidurals. Recently a  
18 consensus opinion paper was published on safeguards to prevent neurologic complications after  
19 epidural steroid injections[26]. The clinical considerations were based on conventional fluoroscopy  
20 with contrast and not with CT fluoroscopy. RCTs show no difference in efficacy between  
21 particulate and non-particulate steroids[27-29].  
22

23 Unlike epidural steroids, systemic steroids have been studied in acute as well as subacute sciatica. A  
24 meta-analysis of 7 small of studies of variable quality of intramuscular (IM), intravenous (IV) and  
25 oral steroids found steroids were not superior to placebo and had more adverse events[30]. Adverse  
26 events, however, were clearly related to the very high dose of dexamethasone used in 3 of the 7  
27 studies (120 mg of dexamethasone in 3 days which is the equivalent of 800mg of oral prednisone).  
28 In another systematic review[12] three studies of acute sciatica using smaller doses of steroid, a  
29 significant effect on short-term overall pain and leg pain was found. A RCT of IM steroid versus IM  
30 saline failed to show a difference in leg pain scores[21]. A blinded RCT reported that IV  
31 dexamethasone (8mg) improved pain scores at 24 hours and reduced ED length of stay compared to  
32 placebo. There was no difference at 6 weeks[31]. No CT/MRI imaging evidence was required. A  
33 recent blinded RCT of patients of oral steroids (prednisone 60mg 5 days, 40mg 5 days and 20mg 5  
34 days) with sciatica less than 12 weeks duration showed an improvement in function at 3 weeks and  
35 52 weeks but no improvement in pain[32].  
36  
37

38 In summary, there are two issues that are relevant that provides the rationale for this pilot/feasibility  
39 study (i) the condition under study i.e. acute, subacute or chronic sciatica, (ii) the route of  
40 interventional procedure (caudal, interlaminar and fluoroscopic transforaminal epidural (the last  
41 with or without CT guidance) or systemic route. There are no RCTs in acute sciatica published  
42 using steroid epidurals of any type. There are RCTs in acute sciatica with systemic steroids. In  
43 subacute and chronic sciatica there are no RCTs that have used selective CT fluoroscopy  
44 transformational steroid injection, indicative of the fast pace of changing technological procedural  
45 interventions without RCT evidence. Arguably, steroids may be more effective for sciatica when  
46 provided in the acute setting, but this should be subjected to rigorous evaluation. In Australia  
47 selective transforaminal epidural steroids is guided by computed tomography (CT) fluoroscopy,  
48 therefore is performed by interventional radiologists. Given their use and perceived effectiveness,  
49 and the costs and potential harms associated with their use, there is an identified need to properly  
50 evaluate the use of epidural and systemic steroids in acute sciatica in adequately controlled trial  
51 designs with a control arm for the route of procedure. Furthermore, given that there is a rationale  
52 for the benefit of epidural saline in acute sciatica, epidural steroid could be directly compared to  
53 epidural saline to evaluate pharmacology versus a simple physical washout of inflammatory  
54 cytokines, lysis of inflammatory mediated adhesions and enhanced blood flow to ischaemic nerves.  
55  
56  
57  
58  
59

1 There is a clear advantage of directly comparing different interventions in a single randomised  
2 control trial. These advantages include improving internal validity, marginally reducing sample  
3 size, and limiting heterogeneity by standardising assessments and conduct procedures. However,  
4 there are also disadvantages such as longer time to trial recruitment, therefore longer time to trial  
5 completion, more exclusion criteria because of differing interventions, and difficulty explaining  
6 design to participants.  
7

## 8 **METHODS / ANALYSIS**

### 9 **Study Objectives**

#### 10 Primary objective

11 Undertake a pilot/feasibility study of patients with acute sciatica designed to evaluate the feasibility  
12 of a blinded 4-arm RCT of (i) selective CT fluoroscopy transforaminal epidural steroid (Arm 1),  
13 (ii) selective CT fluoroscopy transforaminal epidural saline (Arm 2), (iii) 15 days of a tapering  
14 dose of oral steroids (Arm 3), and (iv) a sham epidural and oral placebo control (Arm 4). This  
15 feasibility study is designed to evaluate head-to-head, route versus pharmacology of corticosteroid  
16 intervention by comparing epidural steroid with systemic steroids, and epidural steroid with  
17 epidural saline and includes blinding with oral placebo and sham injection across all arms. The  
18 primary outcome measure is the Oswestry Disability Index (ODI) at 3 weeks. The primary analysis  
19 is comparison of CT fluoroscopy guided transforaminal lumbar epidural steroid versus sham  
20 injection (Arm 1 versus Arm 4 in Figure 1. Study Design).  
21  
22  
23

24 The pilot/feasibility study will evaluate the following issues: rate of recruitment, study conduct  
25 including randomisation allocation concealment, preparation of interventions, choice of procedural  
26 corticosteroid and local anaesthetic, blinding, efficient organisation of initial assessments,  
27 diagnostic imaging, and ensuring efficient study processes across public/private hospital inpatients,  
28 emergency department /room (ED/R) presentations and general practice visits, and timeliness of  
29 providing the intervention within the 4 week acute sciatica requirement. Rate of recruitment is  
30 important particularly where there already is an expectation of treatment benefit “spinal perineural  
31 steroid injections” by health care professionals and patients.  
32  
33

34 This pilot/ feasibility study is a single centre Human Research Ethics Committee (HREC) study, but  
35 includes recruitment from multiple sources and the interventions will be delivered in public  
36 hospital, private hospital and community radiology practices. The recruitment of participants and  
37 the delivery of the interventions have been designed to identify feasibility issues given these  
38 different settings.  
39

#### 40 Secondary objectives

41 1. Obtain preliminary results from this RCT which will be used to calculate the sample size and  
42 power calculations for a full-scale study of treatments currently used in the management of acute  
43 lumbosacral radiculopathy of less than 4 weeks duration is the most effective in reducing pain and  
44 disability in the short-term and prevent progression to persistent or recurrent lumbosacral  
45 radiculopathy in the long term.

46 2. Evaluate the adequacy of outcome measures in acute sciatica, where pain, sensory and motor  
47 neurological symptoms all cause distress and disability, and where pain caused by nerve root  
48 irritation often progresses to loss of pain and may be replaced by sensory loss or weakness from  
49 nerve root conduction impairment. The importance of describing this multifactorial pathology and  
50 how it impacts the primary endpoint, the Oswestry Disability Index has substantive importance  
51 regarding the optimal primary and secondary endpoint for use in a full-scale RCT. Other outcome  
52 measures will also be evaluated such as confounding by medication use and taper, protocol  
53 compliance and burden, confounding by modification of activities and need and timing of rescue  
54 procedures.  
55  
56  
57  
58  
59  
60

3. Although this is a feasibility study, for transparency the following are the pre-specified hypotheses for powering a full-scale RCT. In patients with acute sciatica, selective CT fluoroscopy transforaminal lumbar epidural steroid (Arm 1) is (a) superior to control (Arm 4) and (b) non-inferior to a 15 day tapering dose of oral dexamethasone (Arm 3) in reducing short-term pain and disability (after 3 weeks) as determined by the Oswestry Disability Index. Further information regarding hypotheses and sample size is described in the sample size section.

### Participants, interventions and outcomes

The study setting is the rheumatology service at a large teaching hospital in Sydney, Australia. The teaching hospital services a population of about 1 million of Southern Sydney. The eligibility criteria are as follows:

#### Inclusion criteria

- (i) leg pain of any description with clinical findings consistent with single level radiculopathy,
- (ii) minimum symptom duration > 72hrs,
- (iii) maximum symptom duration < 3 weeks to ensure symptom duration at randomisation is < 4 weeks,
- (iv) no previous episode of same level radicular pain in the previous 6 months,
- (v) pain intensity at >30 on the Oswestry Disability Index (ODI),
- (vi) imaging (MRI and/or CT) indicating herniated disc or foraminal stenosis or both, concordant with the level indicated by history and physical examination,
- (vii) age at least 18 years

#### Exclusion criteria

- (i) previous transforaminal epidural steroids at any level in the last 12 months,
- (ii) previous oral steroids in the last 12 months,
- (iii) any lumbar surgery at same level, or above or below the level at any time,
- (iv) previous lumbar surgery at any other level to that in (iii) within the last 12 months,
- (v) pregnancy, or lactation/breastfeeding
- (vi) direct indication for neurosurgery (e.g. cauda equina syndrome, or progressive motor loss i.e.  $\leq 3/5$  power),
- (vii) inability to read or understand English
- (viii) any serious medical or psychiatric condition that may interfere with participation or outcome assessment such as: need for uninterrupted anti-coagulation, spinal fracture, active infection or metastatic disease suspected, active cancer, poorly controlled diabetes, or patients with diabetes on any insulin, uncontrolled hypertension (systolic blood pressure >180 or diastolic blood pressure >110 within 30 days of randomization date), active peptic ulcer disease, history of intolerance to steroid therapy, previous or current psychiatric history of bipolar disease, or secondary gain such as anticipated or ongoing legal proceedings, history of substance abuse
- (ix) no other pathology likely to explain condition (e.g Guillain-Barre Syndrome, vasculitis)

Both MRI and CT scan are acceptable for entry criteria. If CT is equivocal regarding pathology or level, then the patient will proceed to MRI, or the patient is not included in the study. Scans are performed without contrast. All potential participants will be reviewed by a study physician (rheumatologist) who will undertake a history and physical general, musculoskeletal and neurological examination to ensure inclusion and exclusion criteria and exclude 'red flags' and alternate diagnoses. Full laboratory examination of safety includes full blood count (FBC), C-reactive protein (CRP), erythrocyte sedimentation rate (ESR), coagulation profile, electrolytes, urea, creatinine (EUC), liver function tests (LFTs), fasting blood glucose. Patients who can cease



1 antiplatelet and anticoagulant medications safely will be given instructions on how to do so, or are  
2 excluded. The CT and/or MRI images are reported by an experienced radiologist who is unaware of  
3 the study, and the results are discussed with the participant and their treating physician. If the report  
4 is unclear, the images are reviewed by an independent radiologist at a radiology meeting to clarify  
5 imaging pathology. If imaging pathology remains unclear then eligibility is not met. The images are  
6 also reviewed by the interventional radiologist prior to the procedure (see Implementation). If the  
7 interventional radiologist cannot confirm the specified imaging pathology the procedure is aborted  
8 and the principal investigator is contacted.  
9

## 11 **Interventions**

12 The interventions are as follows and also summarised in Table 1 and Figure 1.  
13

14 **Procedural interventions.** Once the specific spinal nerve pathology has been selected clinically  
15 and on imaging (e.g. right S1 nerve root at L5/S1 intervertebral space), all participants are given an  
16 injection of local anaesthetic (lignocaine or bupivacaine) into the skin and subcutaneous tissue at  
17 this selected site.  
18

19 Participants in Arm 1 will receive selective CT fluoroscopy transforaminal epidural dexamethasone  
20 4mg (1ml) a non-particulate corticosteroid with the local anaesthetic lignocaine 1% (1ml).  
21 However, if participants are an inpatient at St George Hospital they will receive betamethasone  
22 (1ml) as celestone chondrose 5.7mg/ml, a particulate corticosteroid with the local anaesthetic  
23 bupivacaine 0.5% (1ml). This is at the direction of two interventional radiology investigators who  
24 have differing preferences regarding procedural agents. The interventional radiologist and their  
25 preference is known and will be addressed in the hierarchical linear model analysis.  
26  
27

28 Participants in Arm 2 will receive selective CT fluoroscopy transforaminal epidural 0.9% normal  
29 saline (1ml) and lignocaine 1% (1 ml) unless they are hospital inpatients in which case they will  
30 receive bupivacaine 0.5% as the local anaesthetic agent. The saline epidural has two purposes in  
31 this pilot/feasibility study. There is no consensus in the literature regarding the optimal control for  
32 the evaluation of epidural steroids [33]. Moreover, there is some evidence that it has a therapeutic  
33 effect[21]. Therefore this pilot/feasibility study is designed to explore these issues by including  
34 both epidural saline arm (Arm 2) and a sham injection (Arms 3 and 4).  
35

36 Participants in Arms 3 and Arms 4 will receive sham selective CT fluoroscopy intramuscular  
37 injection with needle placement down to muscle layer and no injection of any fluid. The  
38 intervention is performed by an experienced interventional radiologist. The intervention radiologist  
39 is not blind to the procedure (see section Blinding, for more information).  
40

41 **Oral intervention.** The oral steroid is dexamethasone. The 15 day taper dosing is (i) 4 mg at 8am  
42 and 6pm days 1-5, (ii) 2 mg 8am and 6pm days 6-10, and (iii) 1mg 8am and 6pm days 11-15.  
43 Dexamethasone has a longer biological half-life than prednisolone. The oral interventions are over-  
44 encapsulated in gelatine capsules packed with sucrose and lactose. The placebo is sucrose and  
45 lactose only. Participants in Arm 3 receive the oral dexamethasone capsules, and participants in  
46 Arms 1, 2 and 4 receive the placebo capsules. Dexamethasone and placebo capsules have identical  
47 appearance and are prepared by a compounding pharmacist. The capsules are placed in three plastic  
48 bottles with clearly labelled instructions. At each telephone or in-person contact treatment  
49 adherence is monitored.  
50  
51

52 **Concomitant management and interventions:** All participants have concomitant usual care  
53 therapy as directed by the treating physician(s) with analgesics, NSAIDS, pregabalin and physical  
54 therapies. All concomitant therapy will be recorded at each visit. Rescue therapy includes CT  
55 fluoroscopy transforaminal epidural of steroid and neurosurgery.  
56  
57  
58  
59  
60

**Table 1: Summary of the experimental interventions by Arm**

| Arm                                                                                                                                                                                                                                                   | Experimental intervention                                                                                                                                                                                                                                                                                                                                                                                                                                                                                                                                                                                                                                                                                                                                                                                                                                                       |
|-------------------------------------------------------------------------------------------------------------------------------------------------------------------------------------------------------------------------------------------------------|---------------------------------------------------------------------------------------------------------------------------------------------------------------------------------------------------------------------------------------------------------------------------------------------------------------------------------------------------------------------------------------------------------------------------------------------------------------------------------------------------------------------------------------------------------------------------------------------------------------------------------------------------------------------------------------------------------------------------------------------------------------------------------------------------------------------------------------------------------------------------------|
| <p><b>Arm 1<br/>Intervention 1</b></p> <p>Injectable Dexamethasone and Lignocaine OR Betamethasone and Bupivacaine selective CT fluoroscopy guided transforaminal lumbar epidural steroid</p>                                                         | <p><b>Drug: Betamethasone OR Dexamethasone Injectable</b></p> <p>Procedural agents.</p> <p>The steroid and local anaesthetic preparation is determined by interventional radiologist's preferences regarding the use of particulate or non-particulate steroids.</p> <p>Dexamethasone 4mg (1ml) is a non-particulate corticosteroid and is used with the local anaesthetic lignocaine 1% (1ml). Betamethasone Sodium Phosphate/Acetate 5.7 mg/ml Injectable is a particulate corticosteroid and is used with the local anaesthetic bupivacaine 0.5% (1ml). Other Name: celestone chondrase 5.7 mg/ml injectable suspension</p> <p>Other: Sham injection and/or oral placebo</p> <p>The sham Injection procedure is needle placement down to muscle at the designated spinal level and no injection of any fluid. The oral placebo is a gelatine capsule packed with filler.</p> |
| <p><b>Arm 2<br/>Intervention 2</b></p> <p>Normal Saline Flush, 0.9% Injectable Solution with either Bupivacaine or Lignocaine selective CT fluoroscopy guided transforaminal lumbar epidural normal saline</p>                                        | <p><b>Drug: Normal Saline Flush, 0.9% Injectable Solution</b></p> <p>Procedural agents.</p> <p>The local anaesthetic preparation used with the Normal Saline Flush, 0.9% Injectable Solution, will be standardized to replicate current radiology interventional practices: either local anaesthetic bupivacaine 0.5% (1ml) or local anaesthetic lignocaine 1% (1ml).</p> <p>Other: Sham injection and/or oral placebo</p> <p>The sham injection procedure is needle placement down to muscle at the designated spinal level and no injection of any fluid. The oral placebo is a gelatine capsule packed with filler.</p>                                                                                                                                                                                                                                                      |
| <p><b>Arm 3<br/>Intervention 3</b></p> <p>Dexamethasone oral capsule 15 day tapered dosing as follows: (i) days 1-5, 4 mg morning and evening, (ii) days 6-10, 2 mg morning and evening, and (iii) days 11-15, 1mg morning and evening.</p>           | <p><b>Drug: Dexamethasone Oral Tablet</b></p> <p>Dexamethasone Oral Tablet: 15 day taper dosing is: days 1-5 8mg (4mg morning and evening) , days 6-10 4 mg (2mg morning and evening), and days 11-15 2 mg (1mg morning and evening). The dexamethasone is over-encapsulated in a gelatine capsule that is identical to the placebo capsule in appearance.</p> <p>Other: Sham injection and/or oral placebo</p> <p>The sham Injection procedure is needle placement down to muscle at the designated spinal level and no injection of any fluid. The oral placebo is a gelatine capsule packed with filler.</p>                                                                                                                                                                                                                                                                 |
| <p><b>Arm 4<br/>Control</b></p> <p>Sham injection and/or oral placebo: CT/ fluoroscopy guided (parameters set to zero) transforaminal lumbar sham (needle placement down to muscle and no injection of any fluid) AND placebo oral tablets taper.</p> | <p><b>Sham Injection and/or oral placebo</b></p> <p>The sham injection procedure is needle placement down to muscle at the designated spinal level and no injection of any fluid. The oral placebo is a gelatine capsule packed with filler.</p>                                                                                                                                                                                                                                                                                                                                                                                                                                                                                                                                                                                                                                |



## Outcomes

A recent publication on core outcomes domains for clinical trials in non-specific low back pain recommended physical functioning, pain intensity, and health-related quality of life [34].

Primary outcome measure.

*The Oswestry Disability Index (ODI) version 2.0* [35] is the primary outcome measure. The ODI is a functional status measure specifically developed for disorders of the spine and has been used in most RCTs of sciatica[36] and see Table 2. It is a 10-domain 2-page 5 minute questionnaire with ordered 6-response-item (0-5) scales for each question. The questions address domains of pain, physical functioning, sleeping, home/work functioning and impact on social life. The scores are summed, then doubled and the final score is 0-100. The ODI will be administered at Eligibility Baseline/Randomisation (day 0), day 1- 7, weeks 2, 3, 6, 12, 24, 48. This will be administered at visits, phone or mail. The primary analysis is the short-term outcome, reduction of disability at 3 weeks on the ODI. The secondary analysis is the long-term outcome, reduction of disability at 48 weeks on the ODI.

Secondary outcomes.

*Numerical Rating Scale (NRS) for leg pain* is the main secondary outcome. A measure of leg pain is included in all studies of sciatica. The NRS is a validated[37] 11 point scale. Participants will be asked to rate their average leg pain over the preceding 24 hours. Zero represents 'no leg pain' and 10 represents 'worst imaginable pain'. Although the Visual Analogue Scale (VAS) is a more frequently included measure, unlike the VAS, the NRS can be verbally administered by phone. This will be administered at Eligibility Baseline/Randomisation (day 0), day 1-7, weeks 2, 3, 6, 12, 24, 48.

*Numerical Rating Scale (NRS) for back pain.* The severity of back pain may differ to that of leg pain so both measures are needed. It is rated as an average over the preceding 24 hours and will be administered at Eligibility Baseline/Randomisation (day 0), day 1- 7, weeks 2, 3, 6, 12, 24, 48.

*Pain DETECT Questionnaire* [38]. At Eligibility Baseline/Randomisation (day 0), day 1- 7, weeks 2, 3, 6, 12, 24, 48.

*Short-Form 36 (SF-36) questionnaire* [39] evaluates health related quality of life and will be administered at Eligibility, Baseline/Randomisation (day 0), day 1, day 7, weeks 3, 6, 12, 24, 48.

*Lumbosacral and lower limb musculoskeletal and neurological history and clinical examination* at Eligibility, Baseline/Randomisation (day 0), day 1, day 7, weeks 3, 6, 12, 24, 48. This includes inspection of gait, lumbosacral spine and lower limbs for scoliosis, asymmetry, loss of lumbar lordosis, abnormal gait and stance, weakness, muscle wasting, muscle fasciculation, palpation of lumbosacral spine for tenderness and rigidity, movement of lumbosacral spine in flexion and extension, hip, knee and ankle range of movement, straight leg raise and femoral stretch test. Neurological examination of lower limb includes further inspection, examination for tone (normal, increased, decreased), clonus (present absent and beats of clonus if present), power (0, 1, 2, 3, 4, 4+ and 5 out of 5) for 12 lower limb movements (hip abduction, adduction, flexion, extension, knee flexion and extension, ankle dorsiflexion, plantar flexion, inversion and eversion, big toe extension and flexion) , knee and ankle reflexes (increased, normal, decreased absent), plantar reflexes (normal, up-going, equivocal, no response), and pinprick, light touch, proprioception and vibration sensory examination.

*Work and health utilisation measures* at Eligibility, Baseline/Randomisation (day 0), day 1, day 7, weeks 3, 6, 12, 24, 48. These will include days missed from paid employment (if applicable) because of sciatica, use of health services such as doctor, other health-care provider related visits (e.g. acupuncture, chiropractic), injection procedures and neurosurgery. This information will be obtained by interview at each visit and is documented in the case report form developed for the study.

*Demographic and socioeconomic measures* measured at baseline include age, gender, and occupation/previous occupation.

1 *Imaging findings on CT and /or MRI* will be used to define the site, level, type and degree of  
2 pathology using classification systems for disc herniation [40] and severity of nerve root  
3 compression [41]. This data will be used to determine imaging predictors of response.

4 *Medications:* use of all other medications including analgesics, NSAIDs, opiates, gabapentin and  
5 pregabalin will be documented at every visit.  
6

7  
8 *Economic evaluation:* Outcomes for an economic evaluation will also be collected in this feasibility  
9 study. The feasibility of a cost-effectiveness analysis will be undertaken using the ODI and a cost-  
10 utility analysis [42] using the EQ5D-5L for incremental costs per quality-adjusted-life-year  
11 (QALY)[43]. The EQ5D-5L questionnaire will be administered at Eligibility,  
12 Baseline/Randomisation (day 0), day 1, day 7, weeks 3, 6, 12, 24, 48. Work and health utilisation  
13 measures described above will also be collected. Costs within each randomised arm will be assessed  
14 in terms of hospital, health care visits, investigations, such as CT and MRI imaging, procedure costs  
15 and medications costs. These direct costs are determined with Diagnosis Related Groups cost  
16 weights for hospital in-patients, and for outpatients by the Australian Medical Benefits Scheme  
17 standard fees, and the Australian Pharmaceutical Benefits Scheme (PBS). These costs are  
18 determined by the Australian Pharmaceutical Benefits Advisory Committee (PBAC) Manual of  
19 Resources items and their associated costs used for economic analyses[44], [45]. The PBAC does  
20 not require questionnaires of productivity[44],[45] such as the PRODISQ[46] and similar  
21 questionnaires of resource utilization.[47]  
22

23 **Adverse events** will be collected at day 1, day 7, weeks 3, 6, 12, 24, 48. These will include steroid  
24 adverse effects (blood pressure, blood glucose, changes in mood and sleep) and procedural adverse  
25 effects (headaches, bleeding) and information about additional procedures, surgery and  
26 hospitalisations.  
27  
28  
29  
30  
31  
32  
33  
34  
35  
36  
37  
38  
39  
40  
41  
42  
43  
44  
45  
46  
47  
48  
49  
50  
51  
52  
53  
54  
55  
56  
57  
58  
59  
60

**Table 2: Schedule of enrolment, interventions and assessments**

|                                                                                 | STUDY PERIOD            |            |                 |       |    |        |      |     |    |     |     |           |
|---------------------------------------------------------------------------------|-------------------------|------------|-----------------|-------|----|--------|------|-----|----|-----|-----|-----------|
|                                                                                 | Screening & Eligibility | Allocation | Post allocation |       |    |        |      |     |    |     |     | Close-out |
|                                                                                 |                         |            | T1              | T2    | T3 | T4     | T5   | T6  | T7 | T8  | T9  |           |
| TIMEPOINT<br>D=Day W=Week                                                       | -T1                     | 0          | D1              | D 2-6 | D7 | D 8-15 | D14  | D21 | W6 | W12 | W24 | W48       |
| <b>ENROLMENT</b>                                                                |                         |            |                 |       |    |        |      |     |    |     |     |           |
| Eligibility Screen                                                              | ✓                       | ✓          |                 |       |    |        |      |     |    |     |     |           |
| Neurological and musculoskeletal Examination                                    | ✓                       | ✓          |                 |       |    |        |      |     |    |     |     |           |
| Safety Blood Tests                                                              | ✓                       | ✓          | ✓               |       | ✓  |        |      | ✓   |    |     |     |           |
| MRI (or CT if MRI contraindicated or CT clearly demonstrates imaging pathology) | ✓                       |            |                 |       |    |        |      |     |    |     |     |           |
| Oswestry Disability Index                                                       | ✓                       | ✓          |                 |       |    |        |      |     |    |     |     |           |
| Informed Consent                                                                | ✓                       |            |                 |       |    |        |      |     |    |     |     |           |
| Allocation                                                                      |                         | ✓          |                 |       |    |        |      |     |    |     |     |           |
| <b>INTERVENTIONS</b>                                                            |                         |            |                 |       |    |        |      |     |    |     |     |           |
| Procedural injection in radiology suite                                         |                         | X          |                 |       |    |        |      |     |    |     |     |           |
| Oral medications                                                                |                         | X          | X               | XXXX  | X  | XXXX   | XXXX |     |    |     |     |           |
| <b>ASSESSMENTS</b>                                                              |                         |            |                 |       |    |        |      |     |    |     |     |           |
| <b>Outcome Variables</b>                                                        |                         |            |                 |       |    |        |      |     |    |     |     |           |
| Oswestry Disability Index                                                       | ✓                       | ✓          | ✓               | ✓     | ✓  |        | ✓    | ✓   | ✓  | ✓   | ✓   | ✓         |
| Numerical Pain Rating Scales                                                    | ✓                       | ✓          | ✓               | ✓     | ✓  |        | ✓    | ✓   | ✓  | ✓   | ✓   | ✓         |
| PAIN DETECT Questionnaire                                                       | ✓                       | ✓          | ✓               |       | ✓  |        | ✓    | ✓   | ✓  | ✓   | ✓   | ✓         |
| SF-36                                                                           | ✓                       | ✓          |                 |       | ✓  |        | ✓    | ✓   | ✓  | ✓   | ✓   | ✓         |
| EQ-5D-5L                                                                        | ✓                       | ✓          | ✓               |       | ✓  |        | ✓    | ✓   | ✓  | ✓   | ✓   | ✓         |
| Work/health utilisation/costs                                                   | ✓                       | ✓          | ✓               |       | ✓  |        | ✓    | ✓   | ✓  | ✓   | ✓   | ✓         |
| Medication History                                                              | ✓                       | ✓          | ✓               | ✓     | ✓  |        | ✓    | ✓   | ✓  | ✓   | ✓   | ✓         |
| Neurological and musculoskeletal Examination                                    |                         |            | ✓               |       | ✓  |        |      | ✓   | ✓  | ✓   | ✓   | ✓         |
| Safety Blood Tests                                                              |                         |            | ✓               |       | ✓  |        |      |     |    |     |     |           |
| <b>Other Data variables</b>                                                     |                         |            |                 |       |    |        |      |     |    |     |     |           |
| Rescue procedure history                                                        |                         |            | ✓               |       | ✓  |        |      | ✓   | ✓  | ✓   | ✓   | ✓         |
| Participation Randomization perception                                          |                         |            | ✓               |       | ✓  |        |      | ✓   | ✓  | ✓   | ✓   | ✓         |
| Adverse Events & Serious Adverse Event Assessment                               |                         | ✓          | ✓               | ✓     | ✓  |        |      | ✓   | ✓  | ✓   | ✓   | ✓         |

### Sample size

Most trials of subacute and chronic sciatica of a selective CT fluoroscopy transforaminal epidural steroid injection have a sample size of 30 participants per arm. The primary outcome in this pilot/feasibility study is the ODI at 3 weeks comparing epidural steroid and sham injection (Arm 1 vs. Arm 4). With 15 participants per arm, there is 85% power to detect a difference of 17 ODI points between these two arms, given a standard deviation of change of ODI of 15.1 points[32]. Statistical test on which calculation is based is the independent two-sample t-test with a two-tailed alpha of 0.05 (Stata 14). This is a total of 60 participants in this pilot/feasibility study. This is sufficient to evaluate feasibility of the study design, study conduct and determine sample size for a full-scale multicentre study. However, this ODI difference is a large unrealistic effect. The minimum clinically important difference in ODI scores in one study was 7.0 points [48], and an international consensus group found empirical evidence of 4 to 15 ODI points[49] and recommended a cutoff value of 10 ODI points. Given that we are recruiting participants with acute sciatica of less than 4 weeks duration, an ODI difference of at least 10 ODI points is very reasonable. A sample size of 49 participants per arm will provide 90% power to detect a minimum clinically important difference of 10 ODI points assuming a standard deviation of 15.1 with a two-tailed alpha of 0.05 (Stata 14). Allowing for 20% dropout (which at 3 weeks is unlikely but at 48 weeks is more likely), 236 participants will be recruited, 59 to each arm. Although there are 6 possible comparisons in a 4 arm trial, controlling for type-1 error rate is not needed when several different experimental arms are compared with the control[50],[51]. Therefore no multiplicity adjustment is needed for: (i) Comparison I- Arm 1 versus Arm 4 (epidural steroid is superior to control), (ii) Comparison II - Arm 2 versus Arm 4 (epidural saline is superior to control), and Comparison III - Arm 3 versus Arm 4 (oral steroid is superior to control). However, in order to proceed to Comparison IV, Arm 1 versus Arm 3 (epidural steroid is superior to oral steroids), we must first demonstrate that Comparisons I and III were statistical significant, and there must be a type-1 error consideration[52]. Furthermore, if the hypothesis is that oral steroid is non-inferior to epidural steroids, then the ignorable difference must also be prespecified. The pilot/feasibility study will provide data that will be helpful in determining these sample size calculations. The feasibility study will be informative regarding the estimated mean difference in this population, its standard deviation, and pattern of missing data at each of the study visits.

### Recruitment processes

Participants will be recruited from (i) Emergency departments (EDs) of public hospitals, (ii) current inpatients of public and private hospitals and (iii) referral from community general practitioner or medical specialist (rheumatologist, neurosurgeon or orthopaedic surgeon) from the Sydney metropolitan area around St George Hospital. It is anticipated that the majority of participants will be recruited from emergency department presentations and general practitioners. Participants with sciatica symptoms less than 21 days duration are screened so that participants can be evaluated and undergo the allocated intervention within the 4 weeks eligibility criteria.

St George Hospital Emergency Department, as well GPs and relevant specialists in the geographic area (population approximately 270,000) serviced by this hospital area have been provided information about SCIATICA study, the inclusion/exclusion criteria, explanation of the trial rationale, and the opening of a daily acute sciatica clinic at St George Hospital centre as the portal of entry for trial patients.

Participants presenting to the Emergency Department (ED) with acute sciatica are assessed according to ED's usual procedures and staff admit or discharge patients according to their usual care pathway. If the ED does not admit a potential acute sciatica participant, a study clinician is contacted by phone Monday-Friday 9am to 5pm (business hours) and a referral is faxed. Out of business hours, a referral is faxed to the acute sciatica clinic which is processed the next business

1 day (see below). All referred participants are given a brochure by the referring ED clinician  
2 outlining the study. The acute sciatica clinic is also available for urgent referrals from community  
3 general practitioners and specialists. This is by fax or by telephone. These referred participants are  
4 also given a brochure by their referring clinician. All referred potential participants are logged.  
5 Within 1 to 3 days, Monday to Friday, all referred participants are contacted by telephone by a  
6 study clinician and a telephone history is obtained to ascertain suitability regarding inclusion and  
7 exclusion criteria. Where eligibility is clear or indeterminate, an eligibility visit is organised within  
8 the next couple of days. At this visit a full history and examination, musculoskeletal and  
9 neurological is conducted to determine underlying pathology, and if acute sciatica is likely, then  
10 lumbosacral imaging preferably with MRI imaging and blood pathology is requested. Patients  
11 complete routine clinical practice questionnaires as part of clinic audit including ODI, SF-36 and  
12 EQ-5D-5L. Conservative therapy is initiated (medication/physiotherapy) as appropriate. Potential  
13 participants are provided with the Participant Information and Consent Form and further  
14 information regarding the RCT if eligibility criteria are likely. Once imaging and pathology  
15 becomes available the participant is contacted and informed of the results. If s/he meets the criteria  
16 s/he is invited to participate in the RCT. At one of the visits prior to randomisation, all participants  
17 are reviewed by the principal investigator to ensure that all eligibility criteria are met. This includes  
18 a full general, musculoskeletal and neurological history and clinical examination and confirmation  
19 of imaging. If eligibility criteria are met and the participant agrees to participate, then the  
20 participant proceeds down study pathway. Processes are in place to ensure that enrolees, if they  
21 agree to participate, are safely fast-tracked to randomisation and RCT interventions.  
22  
23  
24

25 If patients do not agree to participate in the RCT they can either decide to continue their  
26 management in the acute sciatica clinic, and if their general practitioner is willing then the patient's  
27 ongoing management is determined by the rheumatologists who run the acute sciatica clinic. If the  
28 patient wishes to be managed by their GP, a letter from the acute sciatica clinic is sent to the GP to  
29 facilitate management. The patient has the option of returning to the acute sciatica clinic for further  
30 management or advice as needed. A log of potential participants who decline or are ineligible for  
31 any reason is kept for later evaluation consistent with Consolidated Standards of Reporting Trials  
32 (CONSORT) guidelines[53]. Reason for rejection or refusal will be recorded if available as well as  
33 age, gender, race/ethnicity and ODI score. If the participant does not wish to participate in the RCT  
34 but wish to be managed in the acute sciatica clinic they are included in a clinical audit of the  
35 management of acute sciatica. The management is determined in consultation with the patient and is  
36 generally conservative therapy unless there is severe pain and progressive functional disability  
37 preventing return to work or normal activities, progressive motor weakness, or features on the MRI  
38 imaging that suggests that neurosurgical review is needed.  
39  
40

41 The participant may clearly not meet the eligibility criteria at telephone screening. If patient safety  
42 is not an urgent consideration, patients who have anticipated or ongoing legal proceedings, need  
43 uninterrupted anti-coagulation or active cancer (as exclusion criteria) are not progressed to the  
44 eligibility visit but are asked to see or return to their treating doctor. Participants that do not have  
45 any leg pain are also asked to see or return to their treating doctor. However, if a referred patient  
46 has a history that suggests cauda equina syndrome or symptoms suggestive of malignant or  
47 infection-related pathology, the patient is seen urgently in the acute sciatica clinic and appropriate  
48 investigations and management are instituted.  
49  
50

51 If the participant does not wish to participate they are included in a clinical audit of the management  
52 of acute sciatica during the admission and the participant is continued to be managed according to  
53 the treating clinician. This is generally conservative therapy unless there is progressive severe pain  
54 and functional disability preventing discharge, progressive motor weakness, or features on the MRI  
55 imaging that suggests that neurosurgical review is needed.  
56  
57  
58  
59  
60



1 If the participant is admitted to hospital with acute sciatica the admitting team will contact the study  
2 investigators. Most patients with acute sciatica in our setting are either admitted under the general  
3 medical team, the rheumatology team or the neurosurgical team. The same processes are followed  
4 for in-patients as described above for out-patient referrals. Only a study investigator can consent a  
5 participant to participate in SCIATICA  
6

7  
8 All participants are told that participation is voluntary, they can discuss participation with family,  
9 friends or their health care practitioners, and if they decide not to participate, it will not affect the  
10 treatment they receive now or in the future. They can have family and friends with them during the  
11 consent process. They can also withdraw from the study once it has started, at any time without  
12 having to give a reason.  
13

#### 14 **Assignment of interventions**

15 Sequentially numbered, opaque and sealed envelopes contain the randomised intervention.  
16 Participants are randomly allocated 1:1:1:1 by computer-generated random numbers using permuted  
17 blocks stratified by duration of sciatica ( $\leq 2$  weeks,  $>2$  weeks). The randomisation schedule  
18 including details of blocking schedule are held off-site by the randomised allocation sequence study  
19 investigator who is not involved in participant recruitment, assignment of interventions or data  
20 collection to ensure allocation concealment. This study investigator places the study medications  
21 and procedure instructions for each arm in separate opaque sealed envelopes. These two envelopes  
22 in turn are placed into a single larger opaque sealed envelope labelled with a sequential number and  
23 the randomisation number. The sealed envelopes are held in a locked cabinet until retrieved by the  
24 blinded study investigators who are involved in participant recruitment, provision of the study  
25 interventions, participant management and data collection. The acute sciatica clinic study  
26 investigators are blind to the study intervention.  
27  
28

#### 29 **Implementation of interventions**

30 The day of study intervention implementation, the participant has safety bloods performed, unless  
31 eligibility safety bloods had occurred in the previous week. The participant completes the study  
32 questionnaires and the study clinician once more ascertains eligibility criteria by history and  
33 examination immediately in the morning before attending the radiology suite. If the criteria are still  
34 met the study clinician indicates the exact site of the CT fluoroscopy transforaminal epidural on a  
35 request form that is provided to the interventional radiologist. For example, "perform a selective CT  
36 fluoroscopy transforaminal epidural of corticosteroid and local anaesthetic at L5/S1 targeting the  
37 right S1 nerve root". The MRI images are also provided to the interventional radiologist. The  
38 research officer retrieves the next in sequence numbered large opaque labelled sealed envelope. The  
39 research officer accompanies the participant, taking the interventional request, images (films or on  
40 CD) and large opaque labelled sealed envelope to the radiology suite. At the radiology suite the  
41 research officer opens sealed opaque envelope, gives the 'procedure' envelope with instructions to  
42 the radiologist and exits. The radiologist evaluates the MRI images, then opens the procedure  
43 envelope. It contains one of three instructions: (i) selective CT fluoroscopy transforaminal epidural  
44 steroid and local anaesthetic injection, (ii) selective CT fluoroscopy transforaminal epidural normal  
45 saline and local anaesthetic injection or (iii) intramuscular sham injection down to muscle layer but  
46 no injection of any fluid. The side (right or left) and lumbosacral level (e.g L5/S1) is determined by  
47 the radiology request form. The participant is positioned prone as per a CT fluoroscopy  
48 transforaminal epidural, the CT fluoroscope is positioned as if a CT fluoroscopy transforaminal  
49 epidural is performed, local anaesthetic is injected into the skin and subcutaneous tissue.  
50 Radiologist and his staff maintain patient blinding. CT/fluoroscopy guided transforaminal lumbar  
51 epidural radiation parameters are set to reduce radiation dose. There is no radiation dose for  
52 CT/fluoroscopy guided transforaminal lumbar sham injection because the parameters are set to zero  
53 although the machine is on. All CT fluoroscopy images are saved for further analysis.  
54  
55  
56  
57  
58  
59  
60



1 At the end of the procedure once outside the CT fluoroscopy room, the research officer gives the  
2 opaque envelope marked “Dexamethasone or placebo capsules” to the participant and explains how  
3 the medications are to be taken over the next 15 days. There are three plastic bottles labelled Days  
4 1-5, Days 6-10 and Days 11-15. The participant opens the Day 1 labelled bottle and swallows the  
5 capsule. The participant continues to lie flat for at least one hour after the procedure, the participant  
6 is forbidden to drive for 24 hours and a person accompanies them home. The interventional  
7 radiology procedure report states that the participant had a procedure as part of the SCIATICA RCT  
8 and to contact the chief investigator if there is a concern, a phone number is provided.  
9

### 11 **Masking/Blinding.**

12 All personnel except the radiologist delivering the procedure and the investigator responsible for  
13 randomisation and preparing the interventions will be blind to the randomisation arm. The trial  
14 participant, study clinicians, research officers, participant’s treating care providers, outcome  
15 assessors, and data analysts are blind to the intervention assignments. In the event of a serious  
16 medical emergency during which the treating doctor must know in which arm the participant was  
17 randomised, the randomised code can be broken. Each participant is given a 24 hour emergency  
18 contact number and the principal investigator contacts the investigator who holds the randomisation  
19 schedule to determine the participants allocated intervention.  
20

### 22 **Data collection, management and analysis**

#### 23 **Data collection methods**

24 Data quality of outcome, baseline and other trial data is safeguarded with standardisation, assessor  
25 training and duplication of measurements and assessments by research officers administering the  
26 questionnaires and study clinicians undertaking the history and clinical examinations. All  
27 assessments are reviewed and the history and clinical findings confirmed by the principal  
28 investigator prior final eligibility determination. Study clinicians meet every 2 weeks to discuss  
29 ongoing assessments, issues of standardisation, equivocal or unclear findings and or any other  
30 concerns. All questionnaire data is scanned, with range checks for data values, and verified. Free  
31 text data scanned and verified. Clinical data is coded and verified. Participants’ retention and  
32 complete follow-up is encouraged through contact by phone or text and visits are organised so that  
33 they are maximally convenient for participants. This often requires visits to be conducted at the end  
34 of the normal working day.  
35

#### 37 **Data/Statistical Analysis Plan**

38 Although this is a pilot/feasibility study to evaluate several important clinical and trial design  
39 considerations the following data analysis plan is proposed for transparency. In this feasibility study  
40 treatment is analysed by intention-to-treat and the data analyst will be blind to arm allocation. A  
41 two-tailed p-value  $<0.05$  is considered statistical significant. The primary analysis is an analysis of  
42 variance evaluating the effects of treatment on the ODI at week 3, using treatment arm, baseline  
43 ODI and duration of symptoms in days as covariates. The primary comparison is epidural steroid  
44 versus control. However, similar analyses will be applied to the other treatment comparisons with  
45 control (epidural saline versus control, oral steroid versus control) without a type-1 error penalty.  
46 However, the epidural steroid versus oral steroid comparison will require type-1 error  
47 consideration[52]. All comparisons are made at Day 21, where Day 0 is the day of the procedural  
48 intervention immediately followed by the first dose of the oral intervention. Day 21 is the 3 week  
49 endpoint.  
50

51  
52 Similar analyses will also be applied at the 6 and 48 week endpoints for the ODI. Multilevel linear  
53 mixed model will examine time trend by treatment arm interaction. This linear mixed model will be  
54 used to model ODI trajectory across all 10 time-points by treatment arm, where treatment arm is a  
55 property of the persons and visit is nested within person. The random-effects portion of the model is  
56 time which here is the measurement at each month as the random effect. Analyses will be  
57  
58  
59

1 undertaken unadjusted and adjusted for (i) medication use, (ii) presence of a definite motor  
2 radiculopathy (iii) days from onset of sciatica pain to delivery of the intervention, (iv) whether the  
3 imaging demonstrates a prolapsed disc, a sequestered disc or a extruded disc fragment, (v) whether  
4 imaging demonstrates bony/osteophytic narrowing of the neural exit foramen, and (vi) age.  
5 Missing data will be handled with multiple imputation, using iterative Markov chain Monte Carlo  
6 (MCMC) which requires the assumption that the data are missing at random[54]. An intention to  
7 treat analysis with multiple imputation is the primary analysis, however, a completers analysis will  
8 also be undertaken as a secondary analysis. The value of undertaking a feasibility study is that  
9 patterns and reasons of missing data that are not at random may be identified and in the full-scale  
10 study targeted efforts made to reduce this potential bias. There is no interim analysis.  
11  
12

13  
14 Other outcome measures (NRSs, SF-36, EQ-5D and clinical data measured on a continuous scale)  
15 will also be analysed with multilevel mixed effects linear regression. All analyses will be  
16 undertaken unadjusted and adjusted for other medication use, type of procedural steroid, presence  
17 of neurological signs, and MRI findings with multivariate methods. A full description of  
18 neurological signs will be reported in tabular form and descriptive statistics. Safety data will be  
19 analysed in reported in tabular form and with descriptive statistics.  
20  
21

### 22 **Economic Evaluation**

23 This feasibility study will provide data to identify issues conducting an economic evaluation for the  
24 full-scale study. The rationale for undertaking an economic evaluation is to evaluate the feasibility  
25 of undertaking a pre-specified cost-effectiveness economic evaluation in the full-scale study. In  
26 Australia, all drugs and more recently, certain procedures, undergo a cost-effectiveness analysis to  
27 determine whether they will be subsidised by the Australian government. This is usually performed  
28 from the perspective of the health-care sector rather than from the societal perspective[44]. We will  
29 be following these guidelines. In this pilot/feasibility study we will ascertain the feasibility of  
30 obtaining the outcome (including QALYs) and cost data in a valid manner, determine how much  
31 outcome and cost data are missing, and obtain estimates of mean and standard deviation of  
32 outcomes and costs. The Consolidated Health Economic Evaluation Reporting Standards  
33 (CHEERS)[42] statement checklist will also be followed to report the economic evaluation  
34 component in the full study.  
35  
36

37 In this pilot/feasibility study all participants in all study arms have concomitant usual care therapy  
38 as directed by the treating physician(s) with analgesics, NSAIDS, pregabalin and physical therapies.  
39 *Arm 4, the control arm, therefore is the usual care arm.* In this pilot/feasibility study the perspective  
40 of the health sector is undertaken using intention-to-treat. The incremental cost per point on the ODI  
41 or QALY (based on EQ5D-L) will be estimated as the ratio of the difference in average cost and  
42 ODI or QALY between intervention arms for three comparisons: (i) epidural steroid vs. control, (ii)  
43 oral steroid vs. control, and (iii) epidural steroid vs. oral steroid. Missing data will be imputed with  
44 iterative Markov chain Monte Carlo methods. Sensitivity analyses will be performed by converting  
45 the SF-36 to SF-6D QALYs to compare QALYs, as well as other sensitivity analyses as  
46 recommended by CHEERS.  
47  
48

### 49 **ETHICS AND DISSEMINATION**

#### 50 **Ethics**

51 The study has been approved by South Eastern Sydney Local Health District Human Research  
52 Ethics Committee and is guided by a Data Safety and Monitoring Board and South Eastern Sydney  
53 Local Health District Human Research Ethics Executive (HREC15/331) Protocol version 3, 67  
54 April 2016. Any changes to the protocol are reported to this committee.  
55  
56

#### 57 **Data monitoring**

1 A data safety and monitoring committee (DSMC) will meet after the first 10 participants have been  
2 randomised to evaluate study conduct and safety. The DSMC will consist of the principal  
3 investigator (non-voting), a interventional radiologist, neurosurgeon, rheumatologist, and general  
4 physician. Adverse event monitoring and withdrawal of participants are discussed. The DSMC will  
5 meet every 4 months. The DSMC will be provided blinded data but unblinded data can be provided  
6 for a specific participant if requested by the committee. If requested it will be provided by an  
7 investigator who holds the randomisation schedule.  
8  
9

### 10 **Harms**

11 CT fluoroscopy guided transforaminal lumbar epidural steroid (1 ml) and local anaesthetic (1ml) is  
12 used in the management of sciatica of all durations. The risks associated with this procedure  
13 include:

14 *Dural puncture:* the needle penetrates into the sac encasing the nerves within the spinal canal,  
15 causing leakage of fluid contained within the sac, known as CSF (cerebrospinal fluid). The risk of  
16 this procedure is approximately 1% and is treated with flat bed rest for four hours.

17 *Infection:* most of these are minor (1-2%), however can be serious (<0.1%) requiring hospital  
18 admission, intravenous antibiotics and surgery.

19 *Bleeding:* this is rare although more common in patients with bleeding disorders and on “blood  
20 thinning” medication. Patients who cannot cease their medications will be excluded from the study  
21 (e.g. patients with mechanical heart valve, recent deep venous thrombosis and pulmonary embolus,  
22 recent cardiac stent). Otherwise, patients on warfarin have an INR and depending on the value will  
23 be asked to cease the warfarin 5 days prior to the procedure and an INR will be checked the day  
24 before the procedure and the value must be <1.5. Pradaxa (dabigatran) must be ceased 3 days prior  
25 to the procedure, aspirin and platelet inhibitors (plavix, iscover, ticlopidine, persantin) ceased 7  
26 days prior to the procedure, clexane cease 24 hours prior to the procedure. NSAIDs and COX2  
27 inhibitors do not need to be ceased.

28 *Nerve damage:* from direct needle trauma, or as a consequence of the above mentioned  
29 complications is rare.

30 *Stroke and spinal cord injury:* Most of the reported serious complications result from inadvertently  
31 injecting steroids with particulate matter into blood vessels close to the injection site, which can  
32 lead to brain or spinal cord injury. The risk of stroke or spinal cord damage from a transforaminal  
33 epidural steroid injection in the back is quite low when done under CT fluoroscopy.  
34  
35  
36

37 The risks of high dose short term oral corticosteroids are more common (10-20%) and include  
38 insomnia, nervousness, increased appetite, indigestion, headache. There are risks in patients with  
39 active peptic ulcer disease of perforation, worsening hypertension in patients with severe  
40 hypertension, and hyperglycemia in patients with poorly controlled diabetes or on insulin treatment.  
41 These patients are excluded from the trial. Patients who are on diet or oral hypoglycemic  
42 medications will be monitored with blood tests to minimise risk of significant hyperglycemia.  
43 However, these symptoms and abnormal blood tests will cease with stopping of treatment. There is  
44 no risk of suddenly stopping dexamethasone in this study as it is only being administered for 2  
45 weeks.  
46  
47

48 It is important that women participating in this study are not pregnant or lactating as the study CT  
49 scan fluoroscopy radiation, although small, is not zero, and dexamethasone is secreted in breast  
50 milk.  
51

52 An adverse event is any untoward medical occurrence in a participant which does not necessarily  
53 have a causal relationship with the study treatment. An adverse event can therefore be any  
54 unfavourable or unintended sign, symptom or condition and/or an observation that may or may not  
55 be related to the study treatment. A serious adverse event is any untoward medical occurrence that  
56 results in the following: death, is life-threatening, requires inpatient hospitalization or prolongation  
57  
58  
59

1 of existing hospitalization, persistent or significant disability/incapacity or congenital/birth defect,  
2 condition requiring unnecessary medical or surgical intervention. Solicited reporting of adverse  
3 events occurs Days 1 to 7, Weeks 3, 6, 12, 24, 48. Participants can also contact study investigators  
4 at any time if they have any concerns. All adverse events are reported to the principal investigator  
5 and all serious adverse events are reported to the DSMB and Human Research Ethics Committee.  
6  
7

### 8 **Auditing**

9 A study meeting to audit trial conduct occurs fortnightly. There is no independent trial audit other  
10 than that provided by the DSMB and that required by the Human Research Ethics Committee.  
11

### 12 **Access to Data and Dissemination**

13 The investigators have access to the final trial dataset. There are no contractual agreements limiting  
14 access. Study results of this trial will be submitted for publication in a peer-reviewed journal.

15 Individual level data will be made available after the findings of the study have been published.

16 This data can be used for IPD meta-analyses or for further exploratory research. To obtain this data  
17 please contact Marissa Lassere.

18 The trial is registered on ClinicalTrials. Gov - NCT03240783  
19  
20

### 21 **Patient and Public Involvement**

22 Patients and or public were not formally involved in the in the development of the research question  
23 and outcome measures. Patients were not involved in the design of this feasibility study. Patients  
24 were not involved in the recruitment to and conduct of this feasibility study. At the end of the study  
25 a report of the study results will be provided to all study participants. In this feasibility study of a  
26 randomised controlled trial the burden of the intervention was not assessed by patients or the public.  
27

28 However, the South Eastern Sydney Local Health District Human Research Ethics Committee  
29 (HREC/15/331/POHW/586), which includes members of the public, assisted with the design and  
30 content of the Patient Information and Consent Form that was developed for this study. As a result  
31 of the committee's contribution, the revised Patient Information and Consent Form clearly provides  
32 the reason for undertaking the study, the outcome measures involved, explains the nature of the  
33 interventions and their burden, and clearly summarises overall study conduct.  
34  
35

### 36 **ACKNOWLEDGEMENTS**

37 We would like to thank Dr Derek Glenn, Head, Department of Radiology St George Hospital,  
38 Kogarah for assisting with the information regarding radiation safety, Dr Carl Bryant, Bryant  
39 Radiology, St George Private Hospital for undertaking the interventional procedures and Ms Sue  
40 Baker for developing the case report forms, setting up the database and assisting with the ethics  
41 application, and Ms Jenny Gu for editing the case report forms.  
42  
43

### 44 **COMPETING INTERESTS STATEMENT**

45 There are no competing interests.  
46

### 47 **AUTHORS' CONTRIBUTION**

48 Marissa Lassere conceived and designed the study. Marissa Lassere and Kent Johnson wrote the  
49 first draft of the protocol. Peter Smerdely, Grant Pickard and Jeanette Thom critically reviewed the  
50 protocol for important intellectual content and approved the final version.  
51

### 52 **FUNDING STATEMENT.**

53 This work was supported by The St George and Sutherland Medical Research Foundation,  
54 development grant number 2016/13. <http://www.stgeorgemrf.com.au/2015/11/02/our-2016-grants/>  
55  
56  
57  
58  
59

The sponsor had no role in the study design of this protocol and will have no role in the collection, management, analysis, and interpretation of data; writing of the report; and the decision to submit the report for publication, or authority over any of these activities.

## FIGURE LEGEND

### Figure 1. Study Flow Chart

## FULL REFERENCES

1. Koes BW, van Tulder MW, Peul WC. Diagnosis and treatment of sciatica. *BMJ* 2007;**334**(7607):1313-7 doi: 10.1136/bmj.39223.428495.BE.
2. Bogduk N. On the definitions and physiology of back pain, referred pain, and radicular pain. *Pain* 2009;**147**(1-3):17-9 doi: 10.1016/j.pain.2009.08.020.
3. Stafford MA, Peng P, Hill DA. Sciatica: a review of history, epidemiology, pathogenesis, and the role of epidural steroid injection in management. *Br J Anaesth* 2007;**99**(4):461-73 doi: 10.1093/bja/aem238.
4. Valat JP, Genevay S, Marty M, et al. Sciatica. *Best Pract Res Clin Rheumatol* 2010;**24**(2):241-52 doi: 10.1016/j.berh.2009.11.005.
5. Lin CW, Verwoerd AJ, Maher CG, et al. How is radiating leg pain defined in randomized controlled trials of conservative treatments in primary care? A systematic review. *Eur J Pain* 2014;**18**(4):455-64 doi: 10.1002/j.1532-2149.2013.00384.x.
6. Tarulli AW, Raynor EM. Lumbosacral radiculopathy. *Neurol Clin* 2007;**25**(2):387-405 doi: 10.1016/j.ncl.2007.01.008.
7. Henschke N, Maher CG, Refshauge KM, et al. Characteristics of patients with acute low back pain presenting to primary care in Australia. *Clin J Pain* 2009;**25**(1):5-11 doi: 10.1097/AJP.0b013e3181817a8d.
8. Weber H, Holme I, Amlie E. The natural course of acute sciatica with nerve root symptoms in a double-blind placebo-controlled trial evaluating the effect of piroxicam. *Spine (Phila Pa 1976)* 1993;**18**(11):1433-8
9. Rasmussen-Barr E, Held U, Grooten WJ, et al. Nonsteroidal Anti-inflammatory Drugs for Sciatica: An Updated Cochrane Review. *Spine (Phila Pa 1976)* 2017;**42**(8):586-94 doi: 10.1097/BRS.0000000000002092.
10. Rasmussen-Barr E, Held U, Grooten WJ, et al. Non-steroidal anti-inflammatory drugs for sciatica. *Cochrane Database of Systematic Reviews* 2016;**10**:CD012382
11. Rasmussen-Barr E, Held U, Grooten WJ, et al. Nonsteroidal Anti-inflammatory Drugs for Sciatica: An Updated Cochrane Review. *Spine (Phila Pa 1976)* 2017;**42**(8):586-94
12. Pinto RZ, Maher CG, Ferreira ML, et al. Drugs for relief of pain in patients with sciatica: systematic review and meta-analysis. *BMJ* 2012;**344**:e497 doi: 10.1136/bmj.e497.
13. Mathieson S, Maher CG, McLachlan AJ, et al. Trial of Pregabalin for Acute and Chronic Sciatica. *N Engl J Med* 2017;**376**(12):1111-20 doi: 10.1056/NEJMoa1614292.
14. Pinto RZ, Maher CG, Ferreira ML, et al. Epidural corticosteroid injections in the management of sciatica: a systematic review and meta-analysis. *Ann Intern Med* 2012;**157**(12):865-77
15. Chang-Chien GC, Knezevic NN, McCormick Z, et al. Transforaminal versus interlaminar approaches to epidural steroid injections: a systematic review of comparative studies for lumbosacral radicular pain. *Pain Physician* 2014;**17**(4):E509-24
16. Staal JB, de Bie R, de Vet HC, et al. Injection therapy for subacute and chronic low-back pain. *Cochrane Database of Systematic Reviews* 2008(3):CD001824



17. Bhatia A, Flamer D, Shah PS, et al. Transforaminal Epidural Steroid Injections for Treating Lumbosacral Radicular Pain from Herniated Intervertebral Discs: A Systematic Review and Meta-Analysis. *Anesth Analg* 2016;**122**(3):857-70 doi: 10.1213/ANE.0000000000001155.
18. Riew KD, Yin Y, Gilula L, et al. The effect of nerve-root injections on the need for operative treatment of lumbar radicular pain. A prospective, randomized, controlled, double-blind study. *J Bone Joint Surg Am* 2000;**82-A**(11):1589-93
19. Karppinen J, Malmivaara A, Kurunlahti M, et al. Periradicular infiltration for sciatica: a randomized controlled trial. *Spine (Phila Pa 1976)* 2001;**26**(9):1059-67
20. Tafazal S, Ng L, Chaudhary N, et al. Corticosteroids in peri-radicular infiltration for radicular pain: a randomised double blind controlled trial. One year results and subgroup analysis. *Eur Spine J* 2009;**18**(8):1220-5 doi: 10.1007/s00586-009-1000-2.
21. Ghahreman A, Ferch R, Bogduk N. The efficacy of transforaminal injection of steroids for the treatment of lumbar radicular pain. *Pain Med* 2010;**11**(8):1149-68 doi: 10.1111/j.1526-4637.2010.00908.x.
22. Cohen SP, White RL, Kurihara C, et al. Epidural steroids, etanercept, or saline in subacute sciatica: a multicenter, randomized trial. *Ann Intern Med* 2012;**156**(8):551-9 doi: 10.7326/0003-4819-156-8-201204170-00002.
23. Manchikanti L, Cash KA, Pampati V, et al. Transforaminal epidural injections in chronic lumbar disc herniation: a randomized, double-blind, active-control trial. *Pain Physician* 2014;**17**(4):E489-501
24. Epstein NE. The risks of epidural and transforaminal steroid injections in the Spine: Commentary and a comprehensive review of the literature. *Surg Neurol Int* 2013;**4**(Suppl 2):S74-93 doi: 10.4103/2152-7806.109446.
25. Manchikanti L, Candido KD, Singh V, et al. Epidural steroid warning controversy still dogging FDA. *Pain Physician* 2014;**17**(4):E451-74
26. Rathmell JP, Benzon HT, Dreyfuss P, et al. Safeguards to prevent neurologic complications after epidural steroid injections: consensus opinions from a multidisciplinary working group and national organizations. *Anesthesiology* 2015;**122**(5):974-84 doi: 10.1097/ALN.0000000000000614.
27. El-Yahouchi C, Geske JR, Carter RE, et al. The noninferiority of the nonparticulate steroid dexamethasone vs the particulate steroids betamethasone and triamcinolone in lumbar transforaminal epidural steroid injections. *Pain Med* 2013;**14**(11):1650-7 doi: 10.1111/pme.12214.
28. Kennedy DJ, Plastaras C, Casey E, et al. Comparative effectiveness of lumbar transforaminal epidural steroid injections with particulate versus nonparticulate corticosteroids for lumbar radicular pain due to intervertebral disc herniation: a prospective, randomized, double-blind trial. *Pain Med* 2014;**15**(4):548-55 doi: 10.1111/pme.12325.
29. Denis I, Claveau G, Filiatrault M, et al. Randomized Double-Blind Controlled Trial Comparing the Effectiveness of Lumbar Transforaminal Epidural Injections of Particulate and Nonparticulate Corticosteroids for Lumbosacral Radicular Pain. *Pain Med* 2015 doi: 10.1111/pme.12846.
30. Roncoroni C, Baillet A, Durand M, et al. Efficacy and tolerance of systemic steroids in sciatica: a systematic review and meta-analysis. *Rheumatology (Oxford)* 2011;**50**(9):1603-11 doi: 10.1093/rheumatology/ker151.
31. Balakrishnamoorthy R, Horgan I, Perez S, et al. Does a single dose of intravenous dexamethasone reduce Symptoms in Emergency department patients with low Back pain and RADiculopathy (SEBRA)? A double-blind randomised controlled trial. *Emerg Med J* 2015;**32**(7):525-30 doi: 10.1136/emered-2013-203490.
32. Goldberg H, Firtch W, Tyburski M, et al. Oral steroids for acute radiculopathy due to a herniated lumbar disk: a randomized clinical trial. *JAMA* 2015;**313**(19):1915-23 doi: 10.1001/jama.2015.4468.



- 1 33. Chou R, Hashimoto R, Friedly J, et al. Epidural Corticosteroid Injections for Radiculopathy and  
2 Spinal Stenosis: A Systematic Review and Meta-analysis. *Ann Intern Med* 2015;**163**(5):373-  
3 81 doi: 10.7326/M15-0934.
- 4 34. Chiarotto A, Deyo RA, Terwee CB, et al. Core outcome domains for clinical trials in non-  
5 specific low back pain. *Eur Spine J* 2015;**24**(6):1127-42 doi: 10.1007/s00586-015-3892-3.
- 6 35. Fairbank JC, Pynsent PB. The Oswestry Disability Index. *Spine (Phila Pa 1976)*  
7 2000;**25**(22):2940-52; discussion 52
- 8 36. Guzman JZ, Cutler HS, Connolly J, et al. Patient-Reported Outcome Instruments in Spine  
9 Surgery. *Spine (Phila Pa 1976)* 2016;**41**(5):429-37 doi: 10.1097/BRS.0000000000001211.
- 10 37. Williamson A, Hoggart B. Pain: a review of three commonly used pain rating scales. *J Clin*  
11 *Nurs* 2005;**14**(7):798-804 doi: 10.1111/j.1365-2702.2005.01121.x.
- 12 38. Shaygan M, Boger A, Kroner-Herwig B. Clinical features of chronic pain with neuropathic  
13 characteristics: a symptom-based assessment using the pain DETECT questionnaire. *Eur J*  
14 *Pain* 2013;**17**(10):1529-38 doi: 10.1002/j.1532-2149.2013.00322.x.
- 15 39. Ware JEa. SF-36 Health Survey : manual and interpretation guide. 1993, Boston: The Health  
16 Institute, New England Medical Cente. 1993
- 17 40. Fardon DF, Milette PC, Combined Task Forces of the North American Spine Society ASoSR, et  
18 al. Nomenclature and classification of lumbar disc pathology. Recommendations of the  
19 Combined task Forces of the North American Spine Society, American Society of Spine  
20 Radiology, and American Society of Neuroradiology. *Spine (Phila Pa 1976)*  
21 2001;**26**(5):E93-E113
- 22 41. Pfirrmann CW, Dora C, Schmid MR, et al. MR image-based grading of lumbar nerve root  
23 compromise due to disk herniation: reliability study with surgical correlation. *Radiology*  
24 2004;**230**(2):583-8 doi: 10.1148/radiol.2302021289.
- 25 42. Husereau D, Drummond M, Petrou S, et al. Consolidated Health Economic Evaluation  
26 Reporting Standards (CHEERS) statement. *BMJ* 2013;**346**:f1049 doi: 10.1136/bmj.f1049.
- 27 43. Dolan P. Modeling valuations for EuroQol health states. *Med Care* 1997;**35**(11):1095-108
- 28 44. Commonwealth of Australia as represented by the Department of Health. Guidelines for  
29 preparing a submission to the Pharmaceutical Benefits Advisory Committee (Version 5.0).  
30 <https://pbacpbsgovau/content/information/files/pbac-guidelines-version-5pdf> 2016
- 31 45. Manual of resource items and their associated unit costs. For use in submissions to the  
32 Pharmaceutical Benefits Advisory Committee involving economic analyses Version 5.0  
33 Secondary Manual of resource items and their associated unit costs. For use in submissions  
34 to the Pharmaceutical Benefits Advisory Committee involving economic analyses Version  
35 5.0 2016.
- 36 46. Koopmanschap MA. PRODISQ: a modular questionnaire on productivity and disease for  
37 economic evaluation studies. *Expert Rev Pharmacoecon Outcomes Res* 2005;**5**(1):23-8 doi:  
38 10.1586/14737167.5.1.23.
- 39 47. Leggett LE, Khadaroo RG, Holroyd-Leduc J, et al. Measuring Resource Utilization: A  
40 Systematic Review of Validated Self-Reported Questionnaires. *Medicine (Baltimore)*  
41 2016;**95**(10):e2759 doi: 10.1097/MD.0000000000002759.
- 42 48. Lauridsen HH, Hartvigsen J, Manniche C, et al. Responsiveness and minimal clinically  
43 important difference for pain and disability instruments in low back pain patients. *BMC*  
44 *Musculoskelet Disord* 2006;**7**:82 doi: 10.1186/1471-2474-7-82.
- 45 49. Ostelo RW, Deyo RA, Stratford P, et al. Interpreting change scores for pain and functional  
46 status in low back pain: towards international consensus regarding minimal important  
47 change. *Spine (Phila Pa 1976)* 2008;**33**(1):90-4 doi: 10.1097/BRS.0b013e31815e3a10.
- 48 50. Proschan MA, Waclawiw MA. Practical guidelines for multiplicity adjustment in clinical trials.  
49 *Control Clin Trials* 2000;**21**(6):527-39
- 50 51. Wason JM, Stecher L, Mander AP. Correcting for multiple-testing in multi-arm trials: is it  
51 necessary and is it done? *Trials* 2014;**15**:364 doi: 10.1186/1745-6215-15-364.
- 52  
53  
54  
55  
56  
57  
58  
59  
60

- 1  
2  
3  
4  
5  
6  
7  
8  
9  
10  
11  
12  
13  
14  
15  
16  
17  
18  
19  
20  
21  
22  
23  
24  
25  
26  
27  
28  
29  
30  
31  
32  
33  
34  
35  
36  
37  
38  
39  
40  
41  
42  
43  
44  
45  
46  
47  
48  
49  
50  
51  
52  
53  
54  
55  
56  
57  
58  
59  
60
52. Bender R, Lange S. Adjusting for multiple testing--when and how? J Clin Epidemiol 2001;**54**(4):343-9
53. <http://www.consort-statement.org/>. Secondary <http://www.consort-statement.org/>.
54. White IR, Horton NJ, Carpenter J, et al. Strategy for intention to treat analysis in randomised trials with missing outcome data. BMJ 2011;**342**:d40 doi: 10.1136/bmj.d40.

For peer review only

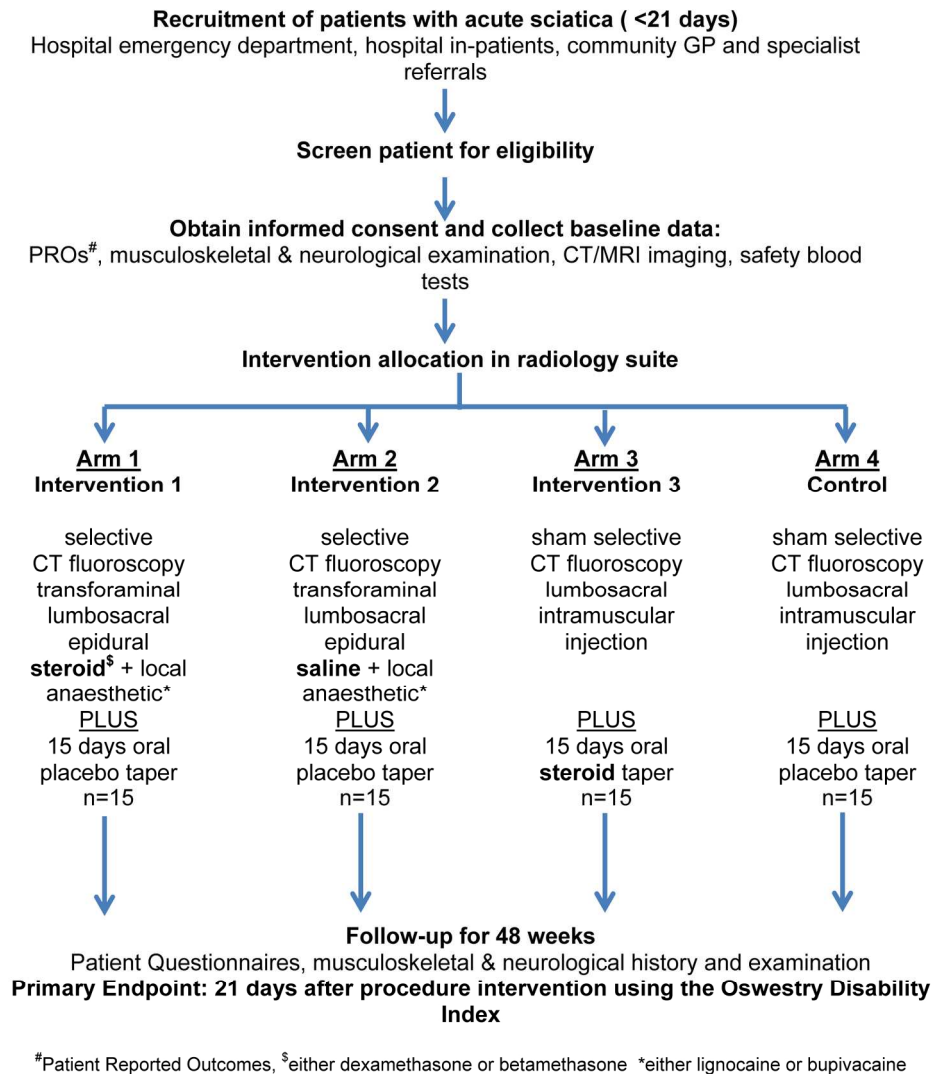

Figure 1. Study Flow Chart

171x184mm (300 x 300 DPI)



SPIRIT 2013 Checklist: Recommended items to address in a clinical trial protocol and related documents\*

| Section/item                      | Item No | Description                                                                                                                                                                                                                                                                              | Addressed on page number |
|-----------------------------------|---------|------------------------------------------------------------------------------------------------------------------------------------------------------------------------------------------------------------------------------------------------------------------------------------------|--------------------------|
| <b>Administrative information</b> |         |                                                                                                                                                                                                                                                                                          |                          |
| Title                             | 1       | Descriptive title identifying the study design, population, interventions, and, if applicable, trial acronym                                                                                                                                                                             | 1                        |
| Trial registration                | 2a      | Trial identifier and registry name. If not yet registered, name of intended registry                                                                                                                                                                                                     | 2                        |
|                                   | 2b      | All items from the World Health Organization Trial Registration Data Set                                                                                                                                                                                                                 |                          |
| Protocol version                  | 3       | Date and version identifier                                                                                                                                                                                                                                                              | 15                       |
| Funding                           | 4       | Sources and types of financial, material, and other support                                                                                                                                                                                                                              | 18                       |
| Roles and responsibilities        | 5a      | Names, affiliations, and roles of protocol contributors                                                                                                                                                                                                                                  | 1, 18                    |
|                                   | 5b      | Name and contact information for the trial sponsor                                                                                                                                                                                                                                       | 18                       |
|                                   | 5c      | Role of study sponsor and funders, if any, in study design; collection, management, analysis, and interpretation of data; writing of the report; and the decision to submit the report for publication, including whether they will have ultimate authority over any of these activities | 18                       |
|                                   | 5d      | Composition, roles, and responsibilities of the coordinating centre, steering committee, endpoint adjudication committee, data management team, and other individuals or groups overseeing the trial, if applicable (see Item 21a for data monitoring committee)                         | 16                       |

1  
2  
3  
4  
5  
6  
7  
8  
9  
10  
11  
12  
13  
14  
15  
16  
17  
18  
19  
20  
21  
22  
23  
24  
25  
26  
27  
28  
29  
30  
31  
32  
33  
34  
35  
36  
37  
38  
39  
40  
41  
42  
43  
44  
45  
46  
47

## Introduction

|                          |    |                                                                                                                                                                                                           |          |
|--------------------------|----|-----------------------------------------------------------------------------------------------------------------------------------------------------------------------------------------------------------|----------|
| Background and rationale | 6a | Description of research question and justification for undertaking the trial, including summary of relevant studies (published and unpublished) examining benefits and harms for each intervention        | 3-4      |
|                          | 6b | Explanation for choice of comparators                                                                                                                                                                     | 3-4, 7-8 |
| Objectives               | 7  | Specific objectives or hypotheses                                                                                                                                                                         | 5        |
| Trial design             | 8  | Description of trial design including type of trial (eg, parallel group, crossover, factorial, single group), allocation ratio, and framework (eg, superiority, equivalence, noninferiority, exploratory) | 7,12     |

## Methods: Participants, interventions, and outcomes

|                      |     |                                                                                                                                                                                                                                                                                                                                                                                |       |
|----------------------|-----|--------------------------------------------------------------------------------------------------------------------------------------------------------------------------------------------------------------------------------------------------------------------------------------------------------------------------------------------------------------------------------|-------|
| Study setting        | 9   | Description of study settings (eg, community clinic, academic hospital) and list of countries where data will be collected. Reference to where list of study sites can be obtained                                                                                                                                                                                             | 12,13 |
| Eligibility criteria | 10  | Inclusion and exclusion criteria for participants. If applicable, eligibility criteria for study centres and individuals who will perform the interventions (eg, surgeons, psychotherapists)                                                                                                                                                                                   | 6     |
| Interventions        | 11a | Interventions for each group with sufficient detail to allow replication, including how and when they will be administered                                                                                                                                                                                                                                                     | 7-8   |
|                      | 11b | Criteria for discontinuing or modifying allocated interventions for a given trial participant (eg, drug dose change in response to harms, participant request, or improving/worsening disease)                                                                                                                                                                                 | 17,18 |
|                      | 11c | Strategies to improve adherence to intervention protocols, and any procedures for monitoring adherence (eg, drug tablet return, laboratory tests)                                                                                                                                                                                                                              | 12,13 |
|                      | 11d | Relevant concomitant care and interventions that are permitted or prohibited during the trial                                                                                                                                                                                                                                                                                  | 7     |
| Outcomes             | 12  | Primary, secondary, and other outcomes, including the specific measurement variable (eg, systolic blood pressure), analysis metric (eg, change from baseline, final value, time to event), method of aggregation (eg, median, proportion), and time point for each outcome. Explanation of the clinical relevance of chosen efficacy and harm outcomes is strongly recommended | 9-10  |
| Participant timeline | 13  | Time schedule of enrolment, interventions (including any run-ins and washouts), assessments, and visits for participants. A schematic diagram is highly recommended (see Figure)                                                                                                                                                                                               | 11    |

|   |             |    |                                                                                                                                                                                       |       |
|---|-------------|----|---------------------------------------------------------------------------------------------------------------------------------------------------------------------------------------|-------|
| 1 |             |    |                                                                                                                                                                                       |       |
| 2 |             |    |                                                                                                                                                                                       |       |
| 3 | Sample size | 14 | Estimated number of participants needed to achieve study objectives and how it was determined, including clinical and statistical assumptions supporting any sample size calculations | 12    |
| 4 |             |    |                                                                                                                                                                                       |       |
| 5 | Recruitment | 15 | Strategies for achieving adequate participant enrolment to reach target sample size                                                                                                   | 12,13 |
| 6 |             |    |                                                                                                                                                                                       |       |
| 7 |             |    |                                                                                                                                                                                       |       |

### 8 **Methods: Assignment of interventions (for controlled trials)**

#### 9 Allocation:

|    |                                  |     |                                                                                                                                                                                                                                                                                                                                                          |       |
|----|----------------------------------|-----|----------------------------------------------------------------------------------------------------------------------------------------------------------------------------------------------------------------------------------------------------------------------------------------------------------------------------------------------------------|-------|
| 10 |                                  |     |                                                                                                                                                                                                                                                                                                                                                          |       |
| 11 |                                  |     |                                                                                                                                                                                                                                                                                                                                                          |       |
| 12 | Sequence generation              | 16a | Method of generating the allocation sequence (eg, computer-generated random numbers), and list of any factors for stratification. To reduce predictability of a random sequence, details of any planned restriction (eg, blocking) should be provided in a separate document that is unavailable to those who enrol participants or assign interventions | 14    |
| 13 |                                  |     |                                                                                                                                                                                                                                                                                                                                                          |       |
| 14 |                                  |     |                                                                                                                                                                                                                                                                                                                                                          |       |
| 15 |                                  |     |                                                                                                                                                                                                                                                                                                                                                          |       |
| 16 |                                  |     |                                                                                                                                                                                                                                                                                                                                                          |       |
| 17 | Allocation concealment mechanism | 16b | Mechanism of implementing the allocation sequence (eg, central telephone; sequentially numbered, opaque, sealed envelopes), describing any steps to conceal the sequence until interventions are assigned                                                                                                                                                | 12-14 |
| 18 |                                  |     |                                                                                                                                                                                                                                                                                                                                                          |       |
| 19 |                                  |     |                                                                                                                                                                                                                                                                                                                                                          |       |
| 20 |                                  |     |                                                                                                                                                                                                                                                                                                                                                          |       |
| 21 | Implementation                   | 16c | Who will generate the allocation sequence, who will enrol participants, and who will assign participants to interventions                                                                                                                                                                                                                                | 14    |
| 22 |                                  |     |                                                                                                                                                                                                                                                                                                                                                          |       |
| 23 |                                  |     |                                                                                                                                                                                                                                                                                                                                                          |       |
| 24 | Blinding (masking)               | 17a | Who will be blinded after assignment to interventions (eg, trial participants, care providers, outcome assessors, data analysts), and how                                                                                                                                                                                                                | 15    |
| 25 |                                  |     |                                                                                                                                                                                                                                                                                                                                                          |       |
| 26 |                                  |     |                                                                                                                                                                                                                                                                                                                                                          |       |
| 27 |                                  | 17b | If blinded, circumstances under which unblinding is permissible, and procedure for revealing a participant's allocated intervention during the trial                                                                                                                                                                                                     | 15    |
| 28 |                                  |     |                                                                                                                                                                                                                                                                                                                                                          |       |
| 29 |                                  |     |                                                                                                                                                                                                                                                                                                                                                          |       |
| 30 |                                  |     |                                                                                                                                                                                                                                                                                                                                                          |       |

### 31 **Methods: Data collection, management, and analysis**

|    |                         |     |                                                                                                                                                                                                                                                                                                                                                                                                              |            |
|----|-------------------------|-----|--------------------------------------------------------------------------------------------------------------------------------------------------------------------------------------------------------------------------------------------------------------------------------------------------------------------------------------------------------------------------------------------------------------|------------|
| 32 |                         |     |                                                                                                                                                                                                                                                                                                                                                                                                              |            |
| 33 | Data collection methods | 18a | Plans for assessment and collection of outcome, baseline, and other trial data, including any related processes to promote data quality (eg, duplicate measurements, training of assessors) and a description of study instruments (eg, questionnaires, laboratory tests) along with their reliability and validity, if known. Reference to where data collection forms can be found, if not in the protocol | 9,10,11,15 |
| 34 |                         |     |                                                                                                                                                                                                                                                                                                                                                                                                              |            |
| 35 |                         |     |                                                                                                                                                                                                                                                                                                                                                                                                              |            |
| 36 |                         |     |                                                                                                                                                                                                                                                                                                                                                                                                              |            |
| 37 |                         |     |                                                                                                                                                                                                                                                                                                                                                                                                              |            |
| 38 |                         | 18b | Plans to promote participant retention and complete follow-up, including list of any outcome data to be collected for participants who discontinue or deviate from intervention protocols                                                                                                                                                                                                                    | 13         |
| 39 |                         |     |                                                                                                                                                                                                                                                                                                                                                                                                              |            |
| 40 |                         |     |                                                                                                                                                                                                                                                                                                                                                                                                              |            |
| 41 |                         |     |                                                                                                                                                                                                                                                                                                                                                                                                              |            |
| 42 |                         |     |                                                                                                                                                                                                                                                                                                                                                                                                              |            |
| 43 |                         |     |                                                                                                                                                                                                                                                                                                                                                                                                              |            |
| 44 |                         |     |                                                                                                                                                                                                                                                                                                                                                                                                              |            |
| 45 |                         |     |                                                                                                                                                                                                                                                                                                                                                                                                              |            |
| 46 |                         |     |                                                                                                                                                                                                                                                                                                                                                                                                              |            |
| 47 |                         |     |                                                                                                                                                                                                                                                                                                                                                                                                              |            |



1  
2  
3  
4  
5  
6  
7  
8  
9  
10  
11  
12  
13  
14  
15  
16  
17  
18  
19  
20  
21  
22  
23  
24  
25  
26  
27  
28  
29  
30  
31  
32  
33  
34  
35  
36  
37  
38  
39  
40  
41  
42  
43  
44  
45  
46  
47

|                 |    |                                                                                                                                                                                                                                                                   |                  |
|-----------------|----|-------------------------------------------------------------------------------------------------------------------------------------------------------------------------------------------------------------------------------------------------------------------|------------------|
| Data management | 19 | Plans for data entry, coding, security, and storage, including any related processes to promote data quality (eg, double data entry; range checks for data values). Reference to where details of data management procedures can be found, if not in the protocol | In HREC protocol |
|-----------------|----|-------------------------------------------------------------------------------------------------------------------------------------------------------------------------------------------------------------------------------------------------------------------|------------------|

|                     |     |                                                                                                                                                                          |       |
|---------------------|-----|--------------------------------------------------------------------------------------------------------------------------------------------------------------------------|-------|
| Statistical methods | 20a | Statistical methods for analysing primary and secondary outcomes. Reference to where other details of the statistical analysis plan can be found, if not in the protocol | 15-16 |
|---------------------|-----|--------------------------------------------------------------------------------------------------------------------------------------------------------------------------|-------|

|  |     |                                                                          |       |
|--|-----|--------------------------------------------------------------------------|-------|
|  | 20b | Methods for any additional analyses (eg, subgroup and adjusted analyses) | 15-16 |
|--|-----|--------------------------------------------------------------------------|-------|

|  |     |                                                                                                                                                                                 |       |
|--|-----|---------------------------------------------------------------------------------------------------------------------------------------------------------------------------------|-------|
|  | 20c | Definition of analysis population relating to protocol non-adherence (eg, as randomised analysis), and any statistical methods to handle missing data (eg, multiple imputation) | 15-16 |
|--|-----|---------------------------------------------------------------------------------------------------------------------------------------------------------------------------------|-------|

**Methods: Monitoring**

|                 |     |                                                                                                                                                                                                                                                                                                                                       |       |
|-----------------|-----|---------------------------------------------------------------------------------------------------------------------------------------------------------------------------------------------------------------------------------------------------------------------------------------------------------------------------------------|-------|
| Data monitoring | 21a | Composition of data monitoring committee (DMC); summary of its role and reporting structure; statement of whether it is independent from the sponsor and competing interests; and reference to where further details about its charter can be found, if not in the protocol. Alternatively, an explanation of why a DMC is not needed | 16,17 |
|-----------------|-----|---------------------------------------------------------------------------------------------------------------------------------------------------------------------------------------------------------------------------------------------------------------------------------------------------------------------------------------|-------|

|  |     |                                                                                                                                                                         |       |
|--|-----|-------------------------------------------------------------------------------------------------------------------------------------------------------------------------|-------|
|  | 21b | Description of any interim analyses and stopping guidelines, including who will have access to these interim results and make the final decision to terminate the trial | 15-16 |
|--|-----|-------------------------------------------------------------------------------------------------------------------------------------------------------------------------|-------|

|       |    |                                                                                                                                                                                   |       |
|-------|----|-----------------------------------------------------------------------------------------------------------------------------------------------------------------------------------|-------|
| Harms | 22 | Plans for collecting, assessing, reporting, and managing solicited and spontaneously reported adverse events and other unintended effects of trial interventions or trial conduct | 10,17 |
|-------|----|-----------------------------------------------------------------------------------------------------------------------------------------------------------------------------------|-------|

|          |    |                                                                                                                                             |    |
|----------|----|---------------------------------------------------------------------------------------------------------------------------------------------|----|
| Auditing | 23 | Frequency and procedures for auditing trial conduct, if any, and whether the process will be independent from investigators and the sponsor | 18 |
|----------|----|---------------------------------------------------------------------------------------------------------------------------------------------|----|

**Ethics and dissemination**

|                          |    |                                                                                           |          |
|--------------------------|----|-------------------------------------------------------------------------------------------|----------|
| Research ethics approval | 24 | Plans for seeking research ethics committee/institutional review board (REC/IRB) approval | approved |
|--------------------------|----|-------------------------------------------------------------------------------------------|----------|

|                     |    |                                                                                                                                                                                                                                  |    |
|---------------------|----|----------------------------------------------------------------------------------------------------------------------------------------------------------------------------------------------------------------------------------|----|
| Protocol amendments | 25 | Plans for communicating important protocol modifications (eg, changes to eligibility criteria, outcomes, analyses) to relevant parties (eg, investigators, REC/IRBs, trial participants, trial registries, journals, regulators) | 16 |
|---------------------|----|----------------------------------------------------------------------------------------------------------------------------------------------------------------------------------------------------------------------------------|----|

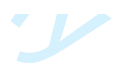

|    |                               |     |                                                                                                                                                                                                                                                                                     |                                       |
|----|-------------------------------|-----|-------------------------------------------------------------------------------------------------------------------------------------------------------------------------------------------------------------------------------------------------------------------------------------|---------------------------------------|
| 1  |                               |     |                                                                                                                                                                                                                                                                                     |                                       |
| 2  |                               |     |                                                                                                                                                                                                                                                                                     |                                       |
| 3  | Consent or assent             | 26a | Who will obtain informed consent or assent from potential trial participants or authorised surrogates, and how (see Item 32)                                                                                                                                                        | 12,13                                 |
| 4  |                               |     |                                                                                                                                                                                                                                                                                     |                                       |
| 5  |                               |     |                                                                                                                                                                                                                                                                                     |                                       |
| 6  |                               | 26b | Additional consent provisions for collection and use of participant data and biological specimens in ancillary studies, if applicable                                                                                                                                               | NA                                    |
| 7  |                               |     |                                                                                                                                                                                                                                                                                     |                                       |
| 8  | Confidentiality               | 27  | How personal information about potential and enrolled participants will be collected, shared, and maintained in order to protect confidentiality before, during, and after the trial                                                                                                | IN HREC protocol                      |
| 9  |                               |     |                                                                                                                                                                                                                                                                                     |                                       |
| 10 |                               |     |                                                                                                                                                                                                                                                                                     |                                       |
| 11 | Declaration of interests      | 28  | Financial and other competing interests for principal investigators for the overall trial and each study site                                                                                                                                                                       | 18                                    |
| 12 |                               |     |                                                                                                                                                                                                                                                                                     |                                       |
| 13 |                               |     |                                                                                                                                                                                                                                                                                     |                                       |
| 14 | Access to data                | 29  | Statement of who will have access to the final trial dataset, and disclosure of contractual agreements that limit such access for investigators                                                                                                                                     | 18                                    |
| 15 |                               |     |                                                                                                                                                                                                                                                                                     |                                       |
| 16 |                               |     |                                                                                                                                                                                                                                                                                     |                                       |
| 17 | Ancillary and post-trial care | 30  | Provisions, if any, for ancillary and post-trial care, and for compensation to those who suffer harm from trial participation                                                                                                                                                       | In patient consent/HREC documentation |
| 18 |                               |     |                                                                                                                                                                                                                                                                                     |                                       |
| 19 |                               |     |                                                                                                                                                                                                                                                                                     |                                       |
| 20 |                               |     |                                                                                                                                                                                                                                                                                     |                                       |
| 21 | Dissemination policy          | 31a | Plans for investigators and sponsor to communicate trial results to participants, healthcare professionals, the public, and other relevant groups (eg, via publication, reporting in results databases, or other data sharing arrangements), including any publication restrictions | 18                                    |
| 22 |                               |     |                                                                                                                                                                                                                                                                                     |                                       |
| 23 |                               |     |                                                                                                                                                                                                                                                                                     |                                       |
| 24 |                               |     |                                                                                                                                                                                                                                                                                     |                                       |
| 25 |                               |     |                                                                                                                                                                                                                                                                                     |                                       |
| 26 |                               | 31b | Authorship eligibility guidelines and any intended use of professional writers                                                                                                                                                                                                      | None used                             |
| 27 |                               |     |                                                                                                                                                                                                                                                                                     |                                       |
| 28 |                               | 31c | Plans, if any, for granting public access to the full protocol, participant-level dataset, and statistical code                                                                                                                                                                     | 18                                    |
| 29 |                               |     |                                                                                                                                                                                                                                                                                     |                                       |
| 30 | <b>Appendices</b>             |     |                                                                                                                                                                                                                                                                                     |                                       |
| 31 |                               |     |                                                                                                                                                                                                                                                                                     |                                       |
| 32 | Informed consent materials    | 32  | Model consent form and other related documentation given to participants and authorised surrogates                                                                                                                                                                                  | HREC                                  |
| 33 |                               |     |                                                                                                                                                                                                                                                                                     |                                       |
| 34 |                               |     |                                                                                                                                                                                                                                                                                     |                                       |
| 35 | Biological specimens          | 33  | Plans for collection, laboratory evaluation, and storage of biological specimens for genetic or molecular analysis in the current trial and for future use in ancillary studies, if applicable                                                                                      | NA                                    |
| 36 |                               |     |                                                                                                                                                                                                                                                                                     |                                       |
| 37 |                               |     |                                                                                                                                                                                                                                                                                     |                                       |

\*It is strongly recommended that this checklist be read in conjunction with the SPIRIT 2013 Explanation & Elaboration for important clarification on the items. Amendments to the protocol should be tracked and dated. The SPIRIT checklist is copyrighted by the SPIRIT Group under the Creative Commons "[Attribution-NonCommercial-NoDerivs 3.0 Unported](https://creativecommons.org/licenses/by-nc-nd/3.0/)" license.

# BMJ Open

## Protocol of the Randomised Placebo Controlled Pilot Trial of the Management of Acute Sciatica (SCIATICA): A Feasibility Study.

|                                 |                                                                                                                                                                                                                                                                                                                                                                                                                                              |
|---------------------------------|----------------------------------------------------------------------------------------------------------------------------------------------------------------------------------------------------------------------------------------------------------------------------------------------------------------------------------------------------------------------------------------------------------------------------------------------|
| Journal:                        | <i>BMJ Open</i>                                                                                                                                                                                                                                                                                                                                                                                                                              |
| Manuscript ID                   | bmjopen-2017-020435.R3                                                                                                                                                                                                                                                                                                                                                                                                                       |
| Article Type:                   | Protocol                                                                                                                                                                                                                                                                                                                                                                                                                                     |
| Date Submitted by the Author:   | 03-May-2018                                                                                                                                                                                                                                                                                                                                                                                                                                  |
| Complete List of Authors:       | Lassere, Marissa; St George Hospital, Rheumatology; University of New South Wales, School of Public Health and Community Medicine<br>Johnson, Kent; University of New South Wales, St George Clinical School, St George Hospital<br>Thom, Jeanette; University of New South Wales, School of Medical Sciences<br>Pickard, Grant; St George Hospital, Medical Assessment Unit<br>Smerdely, Peter; St George Hospital, Department of Aged Care |
| <b>Primary Subject Heading</b>: | Rheumatology                                                                                                                                                                                                                                                                                                                                                                                                                                 |
| Secondary Subject Heading:      | Emergency medicine, General practice / Family practice, Neurology, Radiology and imaging                                                                                                                                                                                                                                                                                                                                                     |
| Keywords:                       | sciatica, Neurosurgery < SURGERY, Adult orthopaedics < ORTHOPAEDIC & TRAUMA SURGERY, epidural steroid, radiculopathy, radicular pain                                                                                                                                                                                                                                                                                                         |
|                                 |                                                                                                                                                                                                                                                                                                                                                                                                                                              |

SCHOLARONE™  
Manuscripts

**Title Page**

Protocol of the Randomised Placebo Controlled Pilot Trial of the Management of Acute Sciatica (SCIATICA): A Feasibility Study

**Corresponding author**

Professor Marissa Nichole Lassere  
Rheumatology Department,  
St George Hospital  
Gray Street,  
Kogarah, 2217  
Australia  
Email: m.lassere@unsw.edu.au  
Telephone: +61291132139

**Co-authors**

Dr Kent Robert Johnson  
St George Clinical School,  
University of NSW  
Kogarah  
Australia

Dr Jeanette Thom  
School of Medical Sciences  
University of NSW  
Kensington  
Australia

Dr Grant Pickard  
Medical Assessment Unit,  
St George Hospital  
Kogarah  
Australia

Professor Peter Smerdely  
Department of Aged Care, St George Hospital  
Kogarah  
Australia

**Word Count** 8684**Keywords**

Sciatica, lumbar-sacral radicular pain, lumbar-sacral radiculopathy, epidural steroids, randomised controlled trial, Oswestry Disability Index,

## ABSTRACT

**Introduction:** Acute sciatica (symptom duration less than 4 weeks), a major cause of pain and disability, is a common presentation to medical practices and hospital emergency departments. Selective computed tomography (CT) fluoroscopy transforaminal epidural steroid injection (TESI) is often used with the hope of reducing pain and improving function. Recently, there has been interest in using systemic corticosteroids in acute sciatica. However, there is limited evidence to inform management of selective CT fluoroscopy transforaminal epidural steroid in subacute and chronic sciatica and there is no evidence in acute sciatica, even though the practice is widespread. There is also limited evidence for the use of systemic corticosteroids in acute sciatica. Furthermore, the management of selective CT fluoroscopy transforaminal epidural steroid versus systemic steroids has never been directly studied.

**Methods and Analysis:** SCIATICA is a pilot/feasibility study of patients with acute sciatica designed to evaluate the feasibility of undertaking a blinded 4-arm randomised controlled intervention study of (i) selective CT fluoroscopy transforaminal epidural steroid (Arm 1), (ii) selective CT fluoroscopy transforaminal epidural saline (Arm 2), (iii) 15 days tapering dose of oral steroids (Arm 3), and (iv) a sham epidural and oral placebo control (Arm 4). This feasibility study is designed to evaluate head-to-head, route versus pharmacology of interventions. The primary outcome measure is the Oswestry Disability Index (ODI) at 3 weeks. Secondary outcome is the ODI at 48 weeks. Other outcomes include numerical rating scale for leg pain, Pain Detect Questionnaire, quality of life, medication use, rescue procedures or surgery, and adverse events. Results of outcomes from this RCT will be used to determine the feasibility, sample size and power calculations for a large multicenter study.

**Ethics and dissemination:** The study has been approved by South Eastern Sydney Local Health District Human Research Ethics Committee (HREC/15/331/POHW/586). ClinicalTrials.Gov NCT03240783

## STRENGTHS AND LIMITATION OF THIS STUDY

- In the setting of acute sciatica (less than 4 weeks duration), this 4-arm trial evaluates the feasibility of undertaking a head-to-head route versus pharmacology of intervention randomised controlled trial by comparing epidural steroid with systemic steroids, and epidural steroid with epidural saline, and includes blinding with both oral placebo and sham injection across each arm. Such a trial directly provides risk versus benefit of interventions of interest.
- Evaluates feasibility of recruiting and protocol adherence of participants from different referral and demographic settings: public hospital inpatients, private hospital inpatients, emergency department presentations and general practitioner visits.
- Evaluates the challenge of recruiting participants to a RCT of acute sciatica where there often is an expectation of treatment benefit of a procedural intervention by health care professionals (and patients given frequent use of the internet for health care advice), because of a large placebo effect, the natural history of the condition, and extrapolation of results from case series or RCTs with different inclusion criteria, but where there is no direct RCT evidence of benefit and risk.

## INTRODUCTION

The colloquial definition of sciatica is pain in the buttock and leg and it is a term understood by the nonprofessional population. The anatomic pathology is usually caused by lumbosacral disc herniation and degenerative lumbosacral spondylosis involving the L2/3 to L5/S1 intervertebral discs and foramina.[1] Therefore sciatica can be associated with numbness, paraesthesia and weakness in the leg. The terms radicular pain and radiculopathy describe this neurological component of the pathology by health-care professionals and researchers.[2] Radicular pain is thought to arise from ectopic activation of nociceptive afferent fibres in a spinal nerve or its roots from ischaemia or inflammation.[3] Radiculopathy indicates that there is conduction block of the spinal nerve or its roots from either mechanical compression or ischaemia. Nonetheless, the terms are still used interchangeably and inconsistently in the randomised controlled trial (RCT) literature.[4],[5] This study defines the term sciatica as radicular pain with or without radiculopathy from lumbosacral nerve root pathology. The definition of acute sciatica in the RCT and systematic review literature also differs. It has been defined as less than 4 weeks, less than 6 weeks and less than 12 weeks duration. Subacute sciatica is usually between 6-12 weeks duration. Chronic sciatica is greater than 12 weeks duration. In this protocol symptoms less than 4 weeks duration are defined as acute.

The prevalence of lumbosacral radiculopathy has been estimated at 3% to 5%[6], whereas referred leg pain is much higher.[4] In an inception cohort of 1,172 patients with acute low back pain presenting to primary care settings in Australia, 25% had leg pain[7]. The majority of participants (72%) with acute sciatica recover completely by 12 months[7]. In another study, 50% of patients with acute sciatica recovered within 4 weeks. However, 30% had persistent leg pain and disability at 12 months[8].

Patients with acute sciatica are treated with a combination of paracetamol, opiate analgesia, non-steroidal anti-inflammatory drugs (NSAIDs)[9-11] pregabalin, and physiotherapy although a systematic review of pharmacologic therapy that included NSAIDs, opioid analgesics, antidepressants, anticonvulsants, muscle relaxants, and opioid analgesics, showed no effect or only small effects in acute, subacute and chronic sciatica[12]. Neuropathic symptom modifiers such as pregabalin have also recently been shown to be ineffective[13].

During the 1970s, failure of conservative management in sciatica and the desire to avoid surgery led to interventional procedures, including epidural steroid injections (ESI). There are three approaches for epidural steroid injections: caudal, interlaminar and transforaminal. The transforaminal approach deposits steroid directly near the ventral epidural space at the affected unilateral nerve root level. Evidence for the superiority of the selective transforaminal approach versus the caudal and interlaminar is generally indirect[14] as there are few high quality head-to-head studies[15]. Selective fluoroscopy (with or without computed tomography (CT) guided fluoroscopy) transforaminal epidural steroid injection (TESI) with local anaesthetic, colloquially described as a "spinal perineural steroid injection", is increasingly being used in the management of patients with acute sciatica in hospital and community settings in the absence of any RCTs undertaken to evaluate the benefit of this procedure in patients with acute sciatica. There are no Cochrane reviews on the management of acute sciatica with epidural steroids of any route[16]. In reviews of epidural steroid injections (caudal, laminar or transforaminal) in sciatica of any duration, not surprisingly, given the heterogeneity of patient populations, interventions, study design and study conduct, conclusions vary considerably. Two recent meta-analyses of epidural steroids in subacute and chronic sciatica [17],[14] conclude that treatment effects are small and of only short duration.

The first transforaminal approach RCT was published in 2000[18]. Five RCTs have been published[19-23] that have had low risk of bias from random sequence generation and participant and personnel blinding. These RCTs show considerable heterogeneity in study design. All RCTs



1  
2  
3  
4  
5  
6  
7  
8  
9  
10  
11  
12  
except one required a symptom duration of at least 4 weeks prior to recruitment. No RCT used CT fluoroscopy. All but one RCT required magnetic resonance imaging (MRI) evidence of disc herniation[18] . Two studies excluded patients with evidence of foraminal stenosis [21 23]. Three studies did not report neurological features.[20],[22],[23] All studies included an epidural control, but only one study also included a non-epidural control[21]. Only two studies clearly specified the primary endpoint[21],[22], but these two studies had incomplete follow-up as they did not obtain further data on patients who failed to achieve a 50% reduction of pain 4 weeks after the last procedure. Where epidural saline was used as an epidural control, speculated mechanisms for a therapeutic effect include washout of inflammatory cytokines, lysis of inflammatory mediated adhesions and enhanced blood flow to ischaemic nerves.[21],

13  
14  
15  
16  
17  
18  
19  
20  
21  
22  
23  
Harms have been reported with transforaminal epidural steroid injections[24] including infection and bleeding. In 2014, the Food and Drug Administration (FDA) issued a letter of warning that injection of corticosteroids into the epidural space of the spine may result in rare, but serious adverse events, including "loss of vision, stroke, paralysis, and death." [25]. The risk is greater for particulate versus non-particulate steroids and in cervical versus lumbosacral epidurals. Recently a consensus opinion paper was published on safeguards to prevent neurologic complications after epidural steroid injections[26]. The clinical considerations were based on conventional fluoroscopy with contrast and not with CT fluoroscopy. RCTs show no difference in efficacy between particulate and non-particulate steroids[27-29].

24  
25  
26  
27  
28  
29  
30  
31  
32  
33  
34  
35  
36  
37  
Unlike epidural steroids, systemic steroids have been studied in acute as well as subacute sciatica. A meta-analysis of 7 small of studies of variable quality of intramuscular (IM), intravenous (IV) and oral steroids found steroids were not superior to placebo and had more adverse events[30]. Adverse events, however, were clearly related to the very high dose of dexamethasone used in 3 of the 7 studies (120 mg of dexamethasone in 3 days which is the equivalent of 800mg of oral prednisone). In another systematic review[12] three studies of acute sciatica using smaller doses of steroid, a significant effect on short-term overall pain and leg pain was found. A RCT of IM steroid versus IM saline failed to show a difference in leg pain scores[21]. A blinded RCT reported that IV dexamethasone (8mg) improved pain scores at 24 hours and reduced ED length of stay compared to placebo. There was no difference at 6 weeks[31]. No CT/MRI imaging evidence was required. A recent blinded RCT of patients of oral steroids (prednisone 60mg 5 days, 40mg 5 days and 20mg 5 days) with sciatica less than 12 weeks duration showed an improvement in function at 3 weeks and 52 weeks but no improvement in pain[32].

38  
39  
40  
41  
42  
43  
44  
45  
46  
47  
48  
49  
50  
51  
52  
53  
54  
55  
56  
57  
58  
59  
60  
In summary, there are two issues that are relevant that provides the rationale for this pilot/feasibility study (i) the condition under study i.e. acute, subacute or chronic sciatica, (ii) the route of interventional procedure (caudal, interlaminar and fluoroscopic transforaminal epidural (the last with or without CT guidance) or systemic route. There are no RCTs in acute sciatica published using steroid epidurals of any type. There are RCTs in acute sciatica with systemic steroids. In subacute and chronic sciatica there are no RCTs that have used selective CT fluoroscopy transformational steroid injection, indicative of the fast pace of changing technological procedural interventions without RCT evidence. Arguably, steroids may be more effective for sciatica when provided in the acute setting, but this should be subjected to rigorous evaluation. In Australia selective transforaminal epidural steroids is guided by computed tomography (CT) fluoroscopy, therefore is performed by interventional radiologists. Given their use and perceived effectiveness, and the costs and potential harms associated with their use, there is an identified need to properly evaluate the use of epidural and systemic steroids in acute sciatica in adequately controlled trial designs with a control arm for the route of procedure. Furthermore, given that there is a rationale for the benefit of epidural saline in acute sciatica, epidural steroid could be directly compared to epidural saline to evaluate pharmacology versus a simple physical washout of inflammatory cytokines, lysis of inflammatory mediated adhesions and enhanced blood flow to ischaemic nerves.

1 There is a clear advantage of directly comparing different interventions in a single randomised  
2 control trial. These advantages include improving internal validity, marginally reducing sample  
3 size, and limiting heterogeneity by standardising assessments and conduct procedures. However,  
4 there are also disadvantages such as longer time to trial recruitment, therefore longer time to trial  
5 completion, more exclusion criteria because of differing interventions, and difficulty explaining  
6 design to participants.  
7

## 8 **METHODS / ANALYSIS**

### 9 **Study Objectives**

#### 10 Primary objective

11 Undertake a pilot/feasibility study of patients with acute sciatica designed to evaluate the feasibility  
12 of a blinded 4-arm RCT of (i) selective CT fluoroscopy transforaminal epidural steroid (Arm 1),  
13 (ii) selective CT fluoroscopy transforaminal epidural saline (Arm 2), (iii) 15 days of a tapering  
14 dose of oral steroids (Arm 3), and (iv) a sham epidural and oral placebo control (Arm 4). This  
15 feasibility study is designed to evaluate head-to-head, route versus pharmacology of corticosteroid  
16 intervention by comparing epidural steroid with systemic steroids, and epidural steroid with  
17 epidural saline and includes blinding with oral placebo and sham injection across all arms. The  
18 primary outcome measure is the Oswestry Disability Index (ODI) at 3 weeks. The primary analysis  
19 is comparison of CT fluoroscopy guided transforaminal lumbar epidural steroid versus sham  
20 injection (Arm 1 versus Arm 4 in Figure 1. Study Design).  
21  
22  
23

24 The pilot/feasibility study will evaluate the following issues: rate of recruitment, study conduct  
25 including randomisation allocation concealment, preparation of interventions, choice of procedural  
26 corticosteroid and local anaesthetic, blinding, efficient organisation of initial assessments,  
27 diagnostic imaging, and ensuring efficient study processes across public/private hospital inpatients,  
28 emergency department /room (ED/R) presentations and general practice visits, and timeliness of  
29 providing the intervention within the 4 week acute sciatica requirement. Rate of recruitment is  
30 important particularly where there already is an expectation of treatment benefit “spinal perineural  
31 steroid injections” by health care professionals and patients.  
32  
33

34 This pilot/ feasibility study is a single centre Human Research Ethics Committee (HREC) study, but  
35 includes recruitment from multiple sources and the interventions will be delivered in public  
36 hospital, private hospital and community radiology practices. The recruitment of participants and  
37 the delivery of the interventions have been designed to identify feasibility issues given these  
38 different settings.  
39

#### 40 Secondary objectives

41 1. Obtain preliminary results from this RCT which will be used to calculate the sample size and  
42 power calculations for a full-scale study of treatments currently used in the management of acute  
43 lumbosacral radiculopathy of less than 4 weeks duration is the most effective in reducing pain and  
44 disability in the short-term and prevent progression to persistent or recurrent lumbosacral  
45 radiculopathy in the long term.

46 2. Evaluate the adequacy of outcome measures in acute sciatica, where pain, sensory and motor  
47 neurological symptoms all cause distress and disability, and where pain caused by nerve root  
48 irritation often progresses to loss of pain and may be replaced by sensory loss or weakness from  
49 nerve root conduction impairment. The importance of describing this multifactorial pathology and  
50 how it impacts the primary endpoint, the Oswestry Disability Index has substantive importance  
51 regarding the optimal primary and secondary endpoint for use in a full-scale RCT. Other outcome  
52 measures will also be evaluated such as confounding by medication use and taper, protocol  
53 compliance and burden, confounding by modification of activities and need and timing of rescue  
54 procedures.  
55  
56  
57  
58  
59  
60

3. Although this is a feasibility study, for transparency the following are the pre-specified hypotheses for powering a full-scale RCT. In patients with acute sciatica, selective CT fluoroscopy transforaminal lumbar epidural steroid (Arm 1) is (a) superior to control (Arm 4) and (b) non-inferior to a 15 day tapering dose of oral dexamethasone (Arm 3) in reducing short-term pain and disability (after 3 weeks) as determined by the Oswestry Disability Index. Further information regarding hypotheses and sample size is described in the sample size section.

### Participants, interventions and outcomes

The study setting is the rheumatology service at a large teaching hospital in Sydney, Australia. The teaching hospital services a population of about 1 million of Southern Sydney. The eligibility criteria are as follows:

#### Inclusion criteria

- (i) leg pain of any description with clinical findings consistent with single level radiculopathy,
- (ii) minimum symptom duration > 72hrs,
- (iii) maximum symptom duration < 3 weeks to ensure symptom duration at randomisation is < 4 weeks,
- (iv) no previous episode of same level radicular pain in the previous 6 months,
- (v) pain intensity at >30 on the Oswestry Disability Index (ODI),
- (vi) imaging (MRI and/or CT) indicating herniated disc or foraminal stenosis or both, concordant with the level indicated by history and physical examination,
- (vii) age at least 18 years

#### Exclusion criteria

- (i) previous transforaminal epidural steroids at any level in the last 12 months,
- (ii) previous oral steroids in the last 12 months,
- (iii) any lumbar surgery at same level, or above or below the level at any time,
- (iv) previous lumbar surgery at any other level to that in (iii) within the last 12 months,
- (v) pregnancy, or lactation/breastfeeding
- (vi) direct indication for neurosurgery (e.g. cauda equina syndrome, or progressive motor loss i.e.  $\leq 3/5$  power),
- (vii) inability to read or understand English
- (viii) any serious medical or psychiatric condition that may interfere with participation or outcome assessment such as: need for uninterrupted anti-coagulation, spinal fracture, active infection or metastatic disease suspected, active cancer, poorly controlled diabetes, or patients with diabetes on any insulin, uncontrolled hypertension (systolic blood pressure >180 or diastolic blood pressure >110 within 30 days of randomization date), active peptic ulcer disease, history of intolerance to steroid therapy, previous or current psychiatric history of bipolar disease, or secondary gain such as anticipated or ongoing legal proceedings, history of substance abuse
- (ix) no other pathology likely to explain condition (e.g Guillain-Barre Syndrome, vasculitis)

Both MRI and CT scan are acceptable for entry criteria. If CT is equivocal regarding pathology or level, then the patient will proceed to MRI, or the patient is not included in the study. Scans are performed without contrast. All potential participants will be reviewed by a study physician (rheumatologist) who will undertake a history and physical general, musculoskeletal and neurological examination to ensure inclusion and exclusion criteria and exclude 'red flags' and alternate diagnoses. Full laboratory examination of safety includes full blood count (FBC), C-reactive protein (CRP), erythrocyte sedimentation rate (ESR), coagulation profile, electrolytes, urea, creatinine (EUC), liver function tests (LFTs), fasting blood glucose. Patients who can cease

1 antiplatelet and anticoagulant medications safely will be given instructions on how to do so, or are  
2 excluded. The CT and/or MRI images are reported by an experienced radiologist who is unaware of  
3 the study, and the results are discussed with the participant and their treating physician. If the report  
4 is unclear, the images are reviewed by an independent radiologist at a radiology meeting to clarify  
5 imaging pathology. If imaging pathology remains unclear then eligibility is not met. The images are  
6 also reviewed by the interventional radiologist prior to the procedure (see Implementation). If the  
7 interventional radiologist cannot confirm the specified imaging pathology the procedure is aborted  
8 and the principal investigator is contacted.  
9

## 11 **Interventions**

12 The interventions are as follows and also summarised in Table 1 and Figure 1.  
13

14 **Procedural interventions.** Once the specific spinal nerve pathology has been selected clinically  
15 and on imaging (e.g. right S1 nerve root at L5/S1 intervertebral space), all participants are given an  
16 injection of local anaesthetic (lignocaine or bupivacaine) into the skin and subcutaneous tissue at  
17 this selected site.  
18

19 Participants in Arm 1 will receive selective CT fluoroscopy transforaminal epidural dexamethasone  
20 4mg (1ml) a non-particulate corticosteroid with the local anaesthetic lignocaine 1% (1ml).  
21 However, if participants are an inpatient at St George Hospital they will receive betamethasone  
22 (1ml) as celestone chondrose 5.7mg/ml, a particulate corticosteroid with the local anaesthetic  
23 bupivacaine 0.5% (1ml). This is at the direction of two interventional radiology investigators who  
24 have differing preferences regarding procedural agents. The interventional radiologist and their  
25 preference is known and will be addressed in the hierarchical linear model analysis.  
26  
27

28 Participants in Arm 2 will receive selective CT fluoroscopy transforaminal epidural 0.9% normal  
29 saline (1ml) and lignocaine 1% (1 ml) unless they are hospital inpatients in which case they will  
30 receive bupivacaine 0.5% as the local anaesthetic agent. The saline epidural has two purposes in  
31 this pilot/feasibility study. There is no consensus in the literature regarding the optimal control for  
32 the evaluation of epidural steroids [33]. Moreover, there is some evidence that it has a therapeutic  
33 effect[21]. Therefore this pilot/feasibility study is designed to explore these issues by including  
34 both epidural saline arm (Arm 2) and a sham injection (Arms 3 and 4).  
35

36 Participants in Arms 3 and Arms 4 will receive sham selective CT fluoroscopy intramuscular  
37 injection with needle placement down to muscle layer and no injection of any fluid. The  
38 intervention is performed by an experienced interventional radiologist. The intervention radiologist  
39 is not blind to the procedure (see section Blinding, for more information).  
40

41 **Oral intervention.** The oral steroid is dexamethasone. The 15 day taper dosing is (i) 4 mg at 8am  
42 and 6pm days 1-5, (ii) 2 mg 8am and 6pm days 6-10, and (iii) 1mg 8am and 6pm days 11-15.  
43 Dexamethasone has a longer biological half-life than prednisolone. The oral interventions are over-  
44 encapsulated in gelatine capsules packed with sucrose and lactose. The placebo is sucrose and  
45 lactose only. Participants in Arm 3 receive the oral dexamethasone capsules, and participants in  
46 Arms 1, 2 and 4 receive the placebo capsules. Dexamethasone and placebo capsules have identical  
47 appearance and are prepared by a compounding pharmacist. The capsules are placed in three plastic  
48 bottles with clearly labelled instructions. At each telephone or in-person contact treatment  
49 adherence is monitored.  
50  
51

52 **Concomitant management and interventions:** All participants have concomitant usual care  
53 therapy as directed by the treating physician(s) with analgesics, NSAIDs, pregabalin and physical  
54 therapies. All concomitant therapy will be recorded at each visit. Rescue therapy includes CT  
55 fluoroscopy transforaminal epidural of steroid and neurosurgery.  
56  
57  
58  
59  
60

**Table 1: Summary of the experimental interventions by Arm**

| Arm                                                                                                                                                                                                                                         | Experimental intervention                                                                                                                                                                                                                                                                                                                                                                                                                                                                                                                                                                                                                                                                                                                                                                                                                                        |
|---------------------------------------------------------------------------------------------------------------------------------------------------------------------------------------------------------------------------------------------|------------------------------------------------------------------------------------------------------------------------------------------------------------------------------------------------------------------------------------------------------------------------------------------------------------------------------------------------------------------------------------------------------------------------------------------------------------------------------------------------------------------------------------------------------------------------------------------------------------------------------------------------------------------------------------------------------------------------------------------------------------------------------------------------------------------------------------------------------------------|
| <p><b>Arm 1<br/>Intervention 1</b></p> <p>Injectable Dexamethasone and Lignocaine OR Betamethasone and Bupivacaine selective CT fluoroscopy guided transforaminal lumbar epidural steroid</p>                                               | <p><b>Drug: Betamethasone OR Dexamethasone Injectable</b><br/>Procedural agents.<br/>The steroid and local anaesthetic preparation is determined by interventional radiologist's preferences regarding the use of particulate or non-particulate steroids.<br/>Dexamethasone 4mg (1ml) is a non-particulate corticosteroid and is used with the local anaesthetic lignocaine 1% (1ml). Betamethasone Sodium Phosphate/Acetate 5.7 mg/ml Injectable is a particulate corticosteroid and is used with the local anaesthetic bupivacaine 0.5% (1ml). Other Name: celestone chondrase 5.7 mg/ml injectable suspension<br/>Other: Sham injection and/or oral placebo<br/>The sham Injection procedure is needle placement down to muscle at the designated spinal level and no injection of any fluid. The oral placebo is a gelatine capsule packed with filler.</p> |
| <p><b>Arm 2<br/>Intervention 2</b></p> <p>Normal Saline Flush, 0.9% Injectable Solution with either Bupivacaine or Lignocaine selective CT fluoroscopy guided transforaminal lumbar epidural normal saline</p>                              | <p><b>Drug: Normal Saline Flush, 0.9% Injectable Solution</b><br/>Procedural agents.<br/>The local anaesthetic preparation used with the Normal Saline Flush, 0.9% Injectable Solution, will be standardized to replicate current radiology interventional practices: either local anaesthetic bupivacaine 0.5% (1ml) or local anaesthetic lignocaine 1% (1ml).<br/>Other: Sham injection and/or oral placebo<br/>The sham injection procedure is needle placement down to muscle at the designated spinal level and no injection of any fluid. The oral placebo is a gelatine capsule packed with filler.</p>                                                                                                                                                                                                                                                   |
| <p><b>Arm 3<br/>Intervention 3</b></p> <p>Dexamethasone oral capsule 15 day tapered dosing as follows: (i) days 1-5, 4 mg morning and evening, (ii) days 6-10, 2 mg morning and evening, and (iii) days 11-15, 1mg morning and evening.</p> | <p><b>Drug: Dexamethasone Oral Tablet</b><br/>Dexamethasone Oral Tablet: 15 day taper dosing is: days 1-5 8mg (4mg morning and evening) , days 6-10 4 mg (2mg morning and evening), and days 11-15 2 mg (1mg morning and evening). The dexamethasone is over-encapsulated in a gelatine capsule that is identical to the placebo capsule in appearance.<br/>Other: Sham injection and/or oral placebo<br/>The sham Injection procedure is needle placement down to muscle at the designated spinal level and no injection of any fluid. The oral placebo is a gelatine capsule packed with filler.</p>                                                                                                                                                                                                                                                           |
| <p><b>Arm 4<br/>Control</b></p> <p>Sham injection and/or oral placebo: CT/ fluoroscopy guided (parameters set to zero) transforaminal lumbar sham (needle placement down to muscle and no injection of any fluid) AND</p>                   | <p><b>Sham Injection and/or oral placebo</b><br/>The sham injection procedure is needle placement down to muscle at the designated spinal level and no injection of any fluid. The oral placebo is a gelatine capsule packed with filler.</p>                                                                                                                                                                                                                                                                                                                                                                                                                                                                                                                                                                                                                    |



|                             |  |
|-----------------------------|--|
| placebo oral tablets taper. |  |
|-----------------------------|--|

## Outcomes

A recent publication on core outcomes domains for clinical trials in non-specific low back pain recommended physical functioning, pain intensity, and health-related quality of life [34].

Primary outcome measure.

*The Oswestry Disability Index (ODI) version 2.0* [35] is the primary outcome measure. The ODI is a functional status measure specifically developed for disorders of the spine and has been used in most RCTs of sciatica[36] and see Table 2. It is a 10-domain 2-page 5 minute questionnaire with ordered 6-response-item (0-5) scales for each question. The questions address domains of pain, physical functioning, sleeping, home/work functioning and impact on social life. The scores are summed, then doubled and the final score is 0-100. The ODI will be administered at Eligibility Baseline/Randomisation (day 0), day 1- 7, weeks 2, 3, 6, 12, 24, 48. This will be administered at visits, phone or mail. The primary analysis is the short-term outcome, reduction of disability at 3 weeks on the ODI. The secondary analysis is the long-term outcome, reduction of disability at 48 weeks on the ODI.

Secondary outcomes.

*Numerical Rating Scale (NRS) for leg pain* is the main secondary outcome. A measure of leg pain is included in all studies of sciatica. The NRS is a validated[37] 11 point scale. Participants will be asked to rate their average leg pain over the preceding 24 hours. Zero represents 'no leg pain' and 10 represents 'worst imaginable pain'. Although the Visual Analogue Scale (VAS) is a more frequently included measure, unlike the VAS, the NRS can be verbally administered by phone. This will be administered at Eligibility Baseline/Randomisation (day 0), day 1-7, weeks 2, 3, 6, 12, 24, 48.

*Numerical Rating Scale (NRS) for back pain.* The severity of back pain may differ to that of leg pain so both measures are needed. It is rated as an average over the preceding 24 hours and will be administered at Eligibility Baseline/Randomisation (day 0), day 1- 7, weeks 2, 3, 6, 12, 24, 48.

*Pain DETECT Questionnaire* [38]. At Eligibility Baseline/Randomisation (day 0), day 1- 7, weeks 2, 3, 6, 12, 24, 48.

*Short-Form 36 (SF-36) questionnaire* [39] evaluates health related quality of life and will be administered at Eligibility, Baseline/Randomisation (day 0), day 1, day 7, weeks 3, 6, 12, 24, 48.

*Lumbosacral and lower limb musculoskeletal and neurological history and clinical examination* at Eligibility, Baseline/Randomisation (day 0), day 1, day 7, weeks 3, 6, 12, 24, 48. This includes inspection of gait, lumbosacral spine and lower limbs for scoliosis, asymmetry, loss of lumbar lordosis, abnormal gait and stance, weakness, muscle wasting, muscle fasciculation, palpation of lumbosacral spine for tenderness and rigidity, movement of lumbosacral spine in flexion and extension, hip, knee and ankle range of movement, straight leg raise and femoral stretch test. Neurological examination of lower limb includes further inspection, examination for tone (normal, increased, decreased), clonus (present absent and beats of clonus if present), power (0, 1, 2, 3, 4, 4+ and 5 out of 5) for 12 lower limb movements (hip abduction, adduction, flexion, extension, knee flexion and extension, ankle dorsiflexion, plantar flexion, inversion and eversion, big toe extension and flexion) , knee and ankle reflexes (increased, normal, decreased absent), plantar reflexes (normal, up-going, equivocal, no response), and pinprick, light touch, proprioception and vibration sensory examination.

*Work and health utilisation measures* at Eligibility, Baseline/Randomisation (day 0), day 1, day 7, weeks 3, 6, 12, 24, 48. These will include days missed from paid employment (if applicable) because of sciatica, use of health services such as doctor, other health-care provider related visits (e.g. acupuncture, chiropractic), injection procedures and neurosurgery. This information will be obtained by interview at each visit and is documented in the case report form developed for the study.



1 *Demographic and socioeconomic measures* measured at baseline include age, gender, and  
2 occupation/previous occupation.

3  
4 *Imaging findings on CT and /or MRI* will be used to define the site, level, type and degree of  
5 pathology using classification systems for disc herniation [40] and severity of nerve root  
6 compression [41]. This data will be used to determine imaging predictors of response.

7 *Medications:* use of all other medications including analgesics, NSAIDs, opiates, gabapentin and  
8 pregabalin will be documented at every visit.  
9

10 *Economic evaluation:* Outcomes for an economic evaluation will also be collected in this feasibility  
11 study. The feasibility of a cost-effectiveness analysis will be undertaken using the ODI and a cost-  
12 utility analysis [42] using the EQ5D-5L for incremental costs per quality-adjusted-life-year  
13 (QALY)[43]. The EQ5D-5L questionnaire will be administered at Eligibility,  
14 Baseline/Randomisation (day 0), day 1, day 7, weeks 3, 6, 12, 24, 48. Work and health utilisation  
15 measures described above will also be collected. Costs within each randomised arm will be assessed  
16 in terms of hospital, health care visits, investigations, such as CT and MRI imaging, procedure costs  
17 and medications costs. These direct costs are determined with Diagnosis Related Groups cost  
18 weights for hospital in-patients, and for outpatients by the Australian Medical Benefits Scheme  
19 standard fees, and the Australian Pharmaceutical Benefits Scheme (PBS). These costs are  
20 determined by the Australian Pharmaceutical Benefits Advisory Committee (PBAC) Manual of  
21 Resources items and their associated costs used for economic analyses[44], [45]. The PBAC does  
22 not require questionnaires of productivity[44],[45] such as the PRODISQ[46] and similar  
23 questionnaires of resource utilization.[47]  
24

25 **Adverse events** will be collected at day 1, day 7, weeks 3, 6, 12, 24, 48. These will include steroid  
26 adverse effects (blood pressure, blood glucose, changes in mood and sleep) and procedural adverse  
27 effects (headaches, bleeding) and information about additional procedures, surgery and  
28 hospitalisations.  
29  
30  
31  
32  
33  
34  
35  
36  
37  
38  
39  
40  
41  
42  
43  
44  
45  
46  
47  
48  
49  
50  
51  
52  
53  
54  
55  
56  
57  
58  
59  
60

**Table 2: Schedule of enrolment, interventions and assessments**

|                                                                                 | STUDY PERIOD            |            |                 |       |    |        |      |     |    |     |     |           |
|---------------------------------------------------------------------------------|-------------------------|------------|-----------------|-------|----|--------|------|-----|----|-----|-----|-----------|
|                                                                                 | Screening & Eligibility | Allocation | Post allocation |       |    |        |      |     |    |     |     | Close-out |
|                                                                                 |                         |            | T1              | T2    | T3 | T4     | T5   | T6  | T7 | T8  | T9  |           |
| TIMEPOINT<br>D=Day W=Week                                                       | -T1                     | 0          | D1              | D 2-6 | D7 | D 8-15 | D14  | D21 | W6 | W12 | W24 | W48       |
| <b>ENROLMENT</b>                                                                |                         |            |                 |       |    |        |      |     |    |     |     |           |
| <b>Eligibility Screen</b>                                                       | ✓                       | ✓          |                 |       |    |        |      |     |    |     |     |           |
| Neurological and musculoskeletal Examination                                    | ✓                       | ✓          |                 |       |    |        |      |     |    |     |     |           |
| Safety Blood Tests                                                              | ✓                       | ✓          | ✓               |       | ✓  |        |      |     | ✓  |     |     |           |
| MRI (or CT if MRI contraindicated or CT clearly demonstrates imaging pathology) | ✓                       |            |                 |       |    |        |      |     |    |     |     |           |
| Oswestry Disability Index                                                       | ✓                       | ✓          |                 |       |    |        |      |     |    |     |     |           |
| <b>Informed Consent</b>                                                         | ✓                       |            |                 |       |    |        |      |     |    |     |     |           |
| <b>Allocation</b>                                                               |                         | ✓          |                 |       |    |        |      |     |    |     |     |           |
| <b>INTERVENTIONS</b>                                                            |                         |            |                 |       |    |        |      |     |    |     |     |           |
| Procedural injection in radiology suite                                         |                         | X          |                 |       |    |        |      |     |    |     |     |           |
| Oral medications                                                                |                         | X          | X               | XXXX  | X  | XXXX   | XXXX |     |    |     |     |           |
| <b>ASSESSMENTS</b>                                                              |                         |            |                 |       |    |        |      |     |    |     |     |           |
| <b>Outcome Variables</b>                                                        |                         |            |                 |       |    |        |      |     |    |     |     |           |
| Oswestry Disability Index                                                       | ✓                       | ✓          | ✓               | ✓     | ✓  |        | ✓    | ✓   | ✓  | ✓   | ✓   | ✓         |
| Numerical Pain Rating Scales                                                    | ✓                       | ✓          | ✓               | ✓     | ✓  |        | ✓    | ✓   | ✓  | ✓   | ✓   | ✓         |
| PAIN DETECT Questionnaire                                                       | ✓                       | ✓          | ✓               |       | ✓  |        | ✓    | ✓   | ✓  | ✓   | ✓   | ✓         |
| SF-36                                                                           | ✓                       | ✓          |                 |       | ✓  |        | ✓    | ✓   | ✓  | ✓   | ✓   | ✓         |
| EQ-5D-5L                                                                        | ✓                       | ✓          | ✓               |       | ✓  |        | ✓    | ✓   | ✓  | ✓   | ✓   | ✓         |
| Work/health utilisation/costs                                                   | ✓                       | ✓          | ✓               |       | ✓  |        | ✓    | ✓   | ✓  | ✓   | ✓   | ✓         |
| Medication History                                                              | ✓                       | ✓          | ✓               | ✓     | ✓  |        | ✓    | ✓   | ✓  | ✓   | ✓   | ✓         |
| Neurological and musculoskeletal Examination                                    |                         |            | ✓               |       | ✓  |        |      | ✓   | ✓  | ✓   | ✓   | ✓         |
| Safety Blood Tests                                                              |                         |            | ✓               |       | ✓  |        |      |     |    |     |     |           |
| <b>Other Data variables</b>                                                     |                         |            |                 |       |    |        |      |     |    |     |     |           |
| Rescue procedure history                                                        |                         |            | ✓               |       | ✓  |        |      | ✓   | ✓  | ✓   | ✓   | ✓         |
| Participation Randomization perception                                          |                         |            | ✓               |       | ✓  |        |      | ✓   | ✓  | ✓   | ✓   | ✓         |
| Adverse Events & Serious Adverse Event Assessment                               |                         | ✓          | ✓               | ✓     | ✓  |        |      | ✓   | ✓  | ✓   | ✓   | ✓         |

### Sample size

Most trials of subacute and chronic sciatica of a selective CT fluoroscopy transforaminal epidural steroid injection have a sample size of 30 participants per arm. The primary outcome in this pilot/feasibility study is the ODI at 3 weeks comparing epidural steroid and sham injection (Arm 1 vs. Arm 4). With 15 participants per arm, there is 85% power to detect a difference of 17 ODI points between these two arms, given a standard deviation of change of ODI of 15.1 points[32]. Statistical test on which calculation is based is the independent two-sample t-test with a two-tailed alpha of 0.05 (Stata 14). This is a total of 60 participants in this pilot/feasibility study. This is sufficient to evaluate feasibility of the study design, study conduct and determine sample size for a full-scale multicentre study. However, this ODI difference is a large unrealistic effect. The minimum clinically important difference in ODI scores in one study was 7.0 points [48], and an international consensus group found empirical evidence of 4 to 15 ODI points[49] and recommended a cutoff value of 10 ODI points. Given that we are recruiting participants with acute sciatica of less than 4 weeks duration, an ODI difference of at least 10 ODI points is very reasonable. A sample size of 49 participants per arm will provide 90% power to detect a minimum clinically important difference of 10 ODI points assuming a standard deviation of 15.1 with a two-tailed alpha of 0.05 (Stata 14). Allowing for 20% dropout (which at 3 weeks is unlikely but at 48 weeks is more likely), 236 participants will be recruited, 59 to each arm. Although there are 6 possible comparisons in a 4 arm trial, controlling for type-1 error rate is not needed when several different experimental arms are compared with the control[50],[51]. Therefore no multiplicity adjustment is needed for: (i) Comparison I- Arm 1 versus Arm 4 (epidural steroid is superior to control), (ii) Comparison II - Arm 2 versus Arm 4 (epidural saline is superior to control), and Comparison III - Arm 3 versus Arm 4 (oral steroid is superior to control). However, in order to proceed to Comparison IV, Arm 1 versus Arm 3 (epidural steroid is superior to oral steroids), we must first demonstrate that Comparisons I and III were statistical significant, and there must be a type-1 error consideration[52]. Furthermore, if the hypothesis is that oral steroid is non-inferior to epidural steroids, then the ignorable difference must also be prespecified. The pilot/feasibility study will provide data that will be helpful in determining these sample size calculations. The feasibility study will be informative regarding the estimated mean difference in this population, its standard deviation, and pattern of missing data at each of the study visits.

### Recruitment processes

Participants will be recruited from (i) Emergency departments (EDs) of public hospitals, (ii) current inpatients of public and private hospitals and (iii) referral from community general practitioner or medical specialist (rheumatologist, neurosurgeon or orthopaedic surgeon) from the Sydney metropolitan area around St George Hospital. It is anticipated that the majority of participants will be recruited from emergency department presentations and general practitioners. Participants with sciatica symptoms less than 21 days duration are screened so that participants can be evaluated and undergo the allocated intervention within the 4 weeks eligibility criteria.

St George Hospital Emergency Department, as well GPs and relevant specialists in the geographic area (population approximately 270,000) serviced by this hospital area have been provided information about SCIATICA study, the inclusion/exclusion criteria, explanation of the trial rationale, and the opening of a daily acute sciatica clinic at St George Hospital centre as the portal of entry for trial patients.

Participants presenting to the Emergency Department (ED) with acute sciatica are assessed according to ED's usual procedures and staff admit or discharge patients according to their usual care pathway. If the ED does not admit a potential acute sciatica participant, a study clinician is contacted by phone Monday-Friday 9am to 5pm (business hours) and a referral is faxed. Out of business hours, a referral is faxed to the acute sciatica clinic which is processed the next business

1 day (see below). All referred participants are given a brochure by the referring ED clinician  
2 outlining the study. The acute sciatica clinic is also available for urgent referrals from community  
3 general practitioners and specialists. This is by fax or by telephone. These referred participants are  
4 also given a brochure by their referring clinician. All referred potential participants are logged.  
5 Within 1 to 3 days, Monday to Friday, all referred participants are contacted by telephone by a  
6 study clinician and a telephone history is obtained to ascertain suitability regarding inclusion and  
7 exclusion criteria. Where eligibility is clear or indeterminate, an eligibility visit is organised within  
8 the next couple of days. At this visit a full history and examination, musculoskeletal and  
9 neurological is conducted to determine underlying pathology, and if acute sciatica is likely, then  
10 lumbosacral imaging preferably with MRI imaging and blood pathology is requested. Patients  
11 complete routine clinical practice questionnaires as part of clinic audit including ODI, SF-36 and  
12 EQ-5D-5L. Conservative therapy is initiated (medication/physiotherapy) as appropriate. Potential  
13 participants are provided with the Participant Information and Consent Form and further  
14 information regarding the RCT if eligibility criteria are likely. Once imaging and pathology  
15 becomes available the participant is contacted and informed of the results. If s/he meets the criteria  
16 s/he is invited to participate in the RCT. At one of the visits prior to randomisation, all participants  
17 are reviewed by the principal investigator to ensure that all eligibility criteria are met. This includes  
18 a full general, musculoskeletal and neurological history and clinical examination and confirmation  
19 of imaging. If eligibility criteria are met and the participant agrees to participate, then the  
20 participant proceeds down study pathway. Processes are in place to ensure that enrolees, if they  
21 agree to participate, are safely fast-tracked to randomisation and RCT interventions.  
22  
23  
24

25 If patients do not agree to participate in the RCT they can either decide to continue their  
26 management in the acute sciatica clinic, and if their general practitioner is willing then the patient's  
27 ongoing management is determined by the rheumatologists who run the acute sciatica clinic. If the  
28 patient wishes to be managed by their GP, a letter from the acute sciatica clinic is sent to the GP to  
29 facilitate management. The patient has the option of returning to the acute sciatica clinic for further  
30 management or advice as needed. A log of potential participants who decline or are ineligible for  
31 any reason is kept for later evaluation consistent with Consolidated Standards of Reporting Trials  
32 (CONSORT) guidelines[53]. Reason for rejection or refusal will be recorded if available as well as  
33 age, gender, race/ethnicity and ODI score. If the participant does not wish to participate in the RCT  
34 but wish to be managed in the acute sciatica clinic they are included in a clinical audit of the  
35 management of acute sciatica. The management is determined in consultation with the patient and is  
36 generally conservative therapy unless there is severe pain and progressive functional disability  
37 preventing return to work or normal activities, progressive motor weakness, or features on the MRI  
38 imaging that suggests that neurosurgical review is needed.  
39  
40

41 The participant may clearly not meet the eligibility criteria at telephone screening. If patient safety  
42 is not an urgent consideration, patients who have anticipated or ongoing legal proceedings, need  
43 uninterrupted anti-coagulation or active cancer (as exclusion criteria) are not progressed to the  
44 eligibility visit but are asked to see or return to their treating doctor. Participants that do not have  
45 any leg pain are also asked to see or return to their treating doctor. However, if a referred patient  
46 has a history that suggests cauda equina syndrome or symptoms suggestive of malignant or  
47 infection-related pathology, the patient is seen urgently in the acute sciatica clinic and appropriate  
48 investigations and management are instituted.  
49  
50

51 If the participant does not wish to participate they are included in a clinical audit of the management  
52 of acute sciatica during the admission and the participant is continued to be managed according to  
53 the treating clinician. This is generally conservative therapy unless there is progressive severe pain  
54 and functional disability preventing discharge, progressive motor weakness, or features on the MRI  
55 imaging that suggests that neurosurgical review is needed.  
56  
57  
58  
59  
60

1 If the participant is admitted to hospital with acute sciatica the admitting team will contact the study  
2 investigators. Most patients with acute sciatica in our setting are either admitted under the general  
3 medical team, the rheumatology team or the neurosurgical team. The same processes are followed  
4 for in-patients as described above for out-patient referrals. Only a study investigator can consent a  
5 participant to participate in SCIATICA  
6

7  
8 All participants are told that participation is voluntary, they can discuss participation with family,  
9 friends or their health care practitioners, and if they decide not to participate, it will not affect the  
10 treatment they receive now or in the future. They can have family and friends with them during the  
11 consent process. They can also withdraw from the study once it has started, at any time without  
12 having to give a reason.  
13

#### 14 **Assignment of interventions**

15 Sequentially numbered, opaque and sealed envelopes contain the randomised intervention.  
16 Participants are randomly allocated 1:1:1:1 by computer-generated random numbers using permuted  
17 blocks stratified by duration of sciatica ( $\leq 2$  weeks,  $>2$  weeks). The randomisation schedule  
18 including details of blocking schedule are held off-site by the randomised allocation sequence study  
19 investigator who is not involved in participant recruitment, assignment of interventions or data  
20 collection to ensure allocation concealment. This study investigator places the study medications  
21 and procedure instructions for each arm in separate opaque sealed envelopes. These two envelopes  
22 in turn are placed into a single larger opaque sealed envelope labelled with a sequential number and  
23 the randomisation number. The sealed envelopes are held in a locked cabinet until retrieved by the  
24 blinded study investigators who are involved in participant recruitment, provision of the study  
25 interventions, participant management and data collection. The acute sciatica clinic study  
26 investigators are blind to the study intervention.  
27  
28

#### 29 **Implementation of interventions**

30 The day of study intervention implementation, the participant has safety bloods performed, unless  
31 eligibility safety bloods had occurred in the previous week. The participant completes the study  
32 questionnaires and the study clinician once more ascertains eligibility criteria by history and  
33 examination immediately in the morning before attending the radiology suite. If the criteria are still  
34 met the study clinician indicates the exact site of the CT fluoroscopy transforaminal epidural on a  
35 request form that is provided to the interventional radiologist. For example, "perform a selective CT  
36 fluoroscopy transforaminal epidural of corticosteroid and local anaesthetic at L5/S1 targeting the  
37 right S1 nerve root". The MRI images are also provided to the interventional radiologist. The  
38 research officer retrieves the next in sequence numbered large opaque labelled sealed envelope. The  
39 research officer accompanies the participant, taking the interventional request, images (films or on  
40 CD) and large opaque labelled sealed envelope to the radiology suite. At the radiology suite the  
41 research officer opens sealed opaque envelope, gives the 'procedure' envelope with instructions to  
42 the radiologist and exits. The radiologist evaluates the MRI images, then opens the procedure  
43 envelope. It contains one of three instructions: (i) selective CT fluoroscopy transforaminal epidural  
44 steroid and local anaesthetic injection, (ii) selective CT fluoroscopy transforaminal epidural normal  
45 saline and local anaesthetic injection or (iii) intramuscular sham injection down to muscle layer but  
46 no injection of any fluid. The side (right or left) and lumbosacral level (e.g L5/S1) is determined by  
47 the radiology request form. The participant is positioned prone as per a CT fluoroscopy  
48 transforaminal epidural, the CT fluoroscope is positioned as if a CT fluoroscopy transforaminal  
49 epidural is performed, local anaesthetic is injected into the skin and subcutaneous tissue.  
50 Radiologist and his staff maintain patient blinding. CT/fluoroscopy guided transforaminal lumbar  
51 epidural radiation parameters are set to reduce radiation dose. There is no radiation dose for  
52 CT/fluoroscopy guided transforaminal lumbar sham injection because the parameters are set to zero  
53 although the machine is on. All CT fluoroscopy images are saved for further analysis.  
54  
55  
56  
57  
58  
59  
60



1 At the end of the procedure once outside the CT fluoroscopy room, the research officer gives the  
2 opaque envelope marked “Dexamethasone or placebo capsules” to the participant and explains how  
3 the medications are to be taken over the next 15 days. There are three plastic bottles labelled Days  
4 1-5, Days 6-10 and Days 11-15. The participant opens the Day 1 labelled bottle and swallows the  
5 capsule. The participant continues to lie flat for at least one hour after the procedure, the participant  
6 is forbidden to drive for 24 hours and a person accompanies them home. The interventional  
7 radiology procedure report states that the participant had a procedure as part of the SCIATICA RCT  
8 and to contact the chief investigator if there is a concern, a phone number is provided.  
9

### 11 **Masking/Blinding.**

12 All personnel except the radiologist delivering the procedure and the investigator responsible for  
13 randomisation and preparing the interventions will be blind to the randomisation arm. The trial  
14 participant, study clinicians, research officers, participant’s treating care providers, outcome  
15 assessors, and data analysts are blind to the intervention assignments. In the event of a serious  
16 medical emergency during which the treating doctor must know in which arm the participant was  
17 randomised, the randomised code can be broken. Each participant is given a 24 hour emergency  
18 contact number and the principal investigator contacts the investigator who holds the randomisation  
19 schedule to determine the participants allocated intervention.  
20

### 21 **Data collection, management and analysis**

#### 22 **Data collection methods**

23 Data quality of outcome, baseline and other trial data is safeguarded with standardisation, assessor  
24 training and duplication of measurements and assessments by research officers administering the  
25 questionnaires and study clinicians undertaking the history and clinical examinations. All  
26 assessments are reviewed and the history and clinical findings confirmed by the principal  
27 investigator prior final eligibility determination. Study clinicians meet every 2 weeks to discuss  
28 ongoing assessments, issues of standardisation, equivocal or unclear findings and or any other  
29 concerns. All questionnaire data is scanned, with range checks for data values, and verified. Free  
30 text data scanned and verified. Clinical data is coded and verified. Participants’ retention and  
31 complete follow-up is encouraged through contact by phone or text and visits are organised so that  
32 they are maximally convenient for participants. This often requires visits to be conducted at the end  
33 of the normal working day.  
34

#### 35 **Data/Statistical Analysis Plan**

36 Although this is a pilot/feasibility study to evaluate several important clinical and trial design  
37 considerations the following data analysis plan is proposed for transparency. In this feasibility study  
38 treatment is analysed by intention-to-treat and the data analyst will be blind to arm allocation. A  
39 two-tailed p-value  $<0.05$  is considered statistical significant. The primary analysis is an analysis of  
40 variance evaluating the effects of treatment on the ODI at week 3, using treatment arm, baseline  
41 ODI and duration of symptoms in days as covariates. The primary comparison is epidural steroid  
42 versus control. However, similar analyses will be applied to the other treatment comparisons with  
43 control (epidural saline versus control, oral steroid versus control) without a type-1 error penalty.  
44 However, the epidural steroid versus oral steroid comparison will require type-1 error  
45 consideration[52]. All comparisons are made at Day 21, where Day 0 is the day of the procedural  
46 intervention immediately followed by the first dose of the oral intervention. Day 21 is the 3 week  
47 endpoint. Similar analyses will also be applied at the 6 and 48 week endpoints for the ODI.  
48

49 Multilevel linear mixed model will examine time trend by treatment arm interaction. This linear  
50 mixed model will be used to model ODI trajectory across all 10 time-points by treatment arm,  
51 where treatment arm is a property of the persons and visit is nested within person. The random-  
52 effect portion of the model is time, which here is each measurement, treated in the model as  
53 monthly time intervals. Analyses will be undertaken unadjusted and adjusted for (i) medication use,  
54



1 (ii) presence of a definite motor radiculopathy (iii) days from onset of sciatica pain to delivery of  
2 the intervention, (iv) whether the imaging demonstrates a prolapsed disc, a sequestered disc or a  
3 extruded disc fragment, (v) whether imaging demonstrates bony/osteophytic narrowing of the  
4 neural exit foramen, and (vi) age. Missing data will be handled with multiple imputation, using  
5 iterative Markov chain Monte Carlo (MCMC) which requires the assumption that the data are  
6 missing at random[54]. An intention to treat analysis with multiple imputation is the primary  
7 analysis, however, a completers analysis will also be undertaken as a secondary analysis. The value  
8 of undertaking a feasibility study is that patterns and reasons of missing data that are not at random  
9 may be identified and in the full-scale study targeted efforts made to reduce this potential bias.  
10 There is no interim analysis.  
11  
12

13  
14 Other outcome measures (NRSs, SF-36, EQ-5D and clinical data measured on a continuous scale)  
15 will also be analysed with multilevel mixed effects linear regression. All analyses will be  
16 undertaken unadjusted and adjusted for other medication use, type of procedural steroid, presence  
17 of neurological signs, and MRI findings with multivariate methods. A full description of  
18 neurological signs will be reported in tabular form and descriptive statistics. Safety data will be  
19 analysed in reported in tabular form and with descriptive statistics.  
20  
21

### 22 **Economic Evaluation**

23 This feasibility study will provide data to identify issues conducting an economic evaluation for the  
24 full-scale study. The rationale for undertaking an economic evaluation is to evaluate the feasibility  
25 of undertaking a pre-specified cost-effectiveness economic evaluation in the full-scale study. In  
26 Australia, all drugs and more recently, certain procedures, undergo a cost-effectiveness analysis to  
27 determine whether they will be subsidised by the Australian government. This is usually performed  
28 from the perspective of the health-care sector rather than from the societal perspective[44]. We will  
29 be following these guidelines. In this pilot/feasibility study we will ascertain the feasibility of  
30 obtaining the outcome (including QALYs) and cost data in a valid manner, determine how much  
31 outcome and cost data are missing, and obtain estimates of mean and standard deviation of  
32 outcomes and costs. The Consolidated Health Economic Evaluation Reporting Standards  
33 (CHEERS)[42] statement checklist will also be followed to report the economic evaluation  
34 component in the full study.  
35  
36

37 In this pilot/feasibility study all participants in all study arms have concomitant usual care therapy  
38 as directed by the treating physician(s) with analgesics, NSAIDs, pregabalin and physical therapies.  
39 *Arm 4, the control arm, therefore is the usual care arm.* In this pilot/feasibility study the perspective  
40 of the health sector is undertaken using intention-to-treat. The incremental cost per point on the ODI  
41 or QALY (based on EQ5D-L) will be estimated as the ratio of the difference in average cost and  
42 ODI or QALY between intervention arms for three comparisons: (i) epidural steroid vs. control, (ii)  
43 oral steroid vs. control, and (iii) epidural steroid vs. oral steroid. Missing data will be imputed with  
44 iterative Markov chain Monte Carlo methods. Sensitivity analyses will be performed by converting  
45 the SF-36 to SF-6D QALYs to compare QALYs, as well as other sensitivity analyses as  
46 recommended by CHEERS.  
47  
48

### 49 **Patient and Public Involvement**

50 Patients and or public were not formally involved in the development of the research question and  
51 outcome measures. Patients were not involved in the design of this feasibility study. Patients were  
52 not involved in the recruitment to and conduct of this feasibility study. At the end of the study a  
53 report of the study results will be provided to all study participants. In this feasibility study of a  
54 randomised controlled trial the burden of the intervention was not assessed by patients or the public.  
55

56 However, the South Eastern Sydney Local Health District Human Research Ethics Committee  
57 (HREC/15/331/POHW/586), which includes members of the public, assisted with the design and  
58  
59

1 content of the Patient Information and Consent Form that was developed for this study. As a result  
2 of the committee's contribution, the revised Patient Information and Consent Form clearly provides  
3 the reason for undertaking the study, the outcome measures involved, explains the nature of the  
4 interventions and their burden, and clearly summarises overall study conduct.  
5

## 6 **ETHICS AND DISSEMINATION**

### 7 **Ethics**

8  
9 The study has been approved by South Eastern Sydney Local Health District Human Research  
10 Ethics Committee and is guided by a Data Safety and Monitoring Board and South Eastern Sydney  
11 Local Health District Human Research Ethics Executive (HREC15/331) Protocol version 3, 67  
12 April 2016. Any changes to the protocol are reported to this committee.  
13  
14

### 15 **Data monitoring**

16 A data safety and monitoring committee (DSMC) will meet after the first 10 participants have been  
17 randomised to evaluate study conduct and safety. The DSMC will consist of the principal  
18 investigator (non-voting), a interventional radiologist, neurosurgeon, rheumatologist, and general  
19 physician. Adverse event monitoring and withdrawal of participants are discussed. The DSMC will  
20 meet every 4 months. The DSMC will be provided blinded data but unblinded data can be provided  
21 for a specific participant if requested by the committee. If requested it will be provided by an  
22 investigator who holds the randomisation schedule.  
23  
24

### 25 **Harms**

26 CT fluoroscopy guided transforaminal lumbar epidural steroid (1 ml) and local anaesthetic (1ml) is  
27 used in the management of sciatica of all durations. The risks associated with this procedure  
28 include:  
29

30 *Dural puncture:* the needle penetrates into the sac encasing the nerves within the spinal canal,  
31 causing leakage of fluid contained within the sac, known as CSF (cerebrospinal fluid). The risk of  
32 this procedure is approximately 1% and is treated with flat bed rest for four hours.

33 *Infection:* most of these are minor (1-2%), however can be serious (<0.1%) requiring hospital  
34 admission, intravenous antibiotics and surgery.

35 *Bleeding:* this is rare although more common in patients with bleeding disorders and on "blood  
36 thinning" medication. Patients who cannot cease their medications will be excluded from the study  
37 (e.g. patients with mechanical heart valve, recent deep venous thrombosis and pulmonary embolus,  
38 recent cardiac stent). Otherwise, patients on warfarin have an INR and depending on the value will  
39 be asked to cease the warfarin 5 days prior to the procedure and an INR will be checked the day  
40 before the procedure and the value must be <1.5. Pradaxa (dabigatran) must be ceased 3 days prior  
41 to the procedure, aspirin and platelet inhibitors (plavix, iscover, ticlopidine, persantin) ceased 7  
42 days prior to the procedure, clexane cease 24 hours prior to the procedure. NSAIDs and COX2  
43 inhibitors do not need to be ceased.  
44

45 *Nerve damage:* from direct needle trauma, or as a consequence of the above mentioned  
46 complications is rare.

47 *Stroke and spinal cord injury:* Most of the reported serious complications result from inadvertently  
48 injecting steroids with particulate matter into blood vessels close to the injection site, which can  
49 lead to brain or spinal cord injury. The risk of stroke or spinal cord damage from a transforaminal  
50 epidural steroid injection in the back is quite low when done under CT fluoroscopy.  
51

52 The risks of high dose short term oral corticosteroids are more common (10-20%) and include  
53 insomnia, nervousness, increased appetite, indigestion, headache. There are risks in patients with  
54 active peptic ulcer disease of perforation, worsening hypertension in patients with severe  
55 hypertension, and hyperglycemia in patients with poorly controlled diabetes or on insulin treatment.  
56 These patients are excluded from the trial. Patients who are on diet or oral hypoglycemic  
57  
58  
59

1 medications will be monitored with blood tests to minimise risk of significant hyperglycemia.  
2 However, these symptoms and abnormal blood tests will cease with stopping of treatment. There is  
3 no risk of suddenly stopping dexamethasone in this study as it is only being administered for 2  
4 weeks.  
5

6  
7 It is important that women participating in this study are not pregnant or lactating as the study CT  
8 scan fluoroscopy radiation, although small, is not zero, and dexamethasone is secreted in breast  
9 milk.  
10

11 An adverse event is any untoward medical occurrence in a participant which does not necessarily  
12 have a causal relationship with the study treatment. An adverse event can therefore be any  
13 unfavourable or unintended sign, symptom or condition and/or an observation that may or may not  
14 be related to the study treatment. A serious adverse event is any untoward medical occurrence that  
15 results in the following: death, is life-threatening, requires inpatient hospitalization or prolongation  
16 of existing hospitalization, persistent or significant disability/incapacity or congenital/birth defect,  
17 condition requiring unnecessary medical or surgical intervention. Solicited reporting of adverse  
18 events occurs Days 1 to 7, Weeks 3, 6, 12, 24, 48. Participants can also contact study investigators  
19 at any time if they have any concerns. All adverse events are reported to the principal investigator  
20 and all serious adverse events are reported to the DMSC and Human Research Ethics Committee.  
21  
22

### 23 **Auditing**

24 A study meeting to audit trial conduct occurs fortnightly. There is no independent trial audit other  
25 than that provided by the DSMC and that required by the Human Research Ethics Committee.  
26

### 27 **Access to Data and Dissemination**

28 The investigators have access to the final trial dataset. There are no contractual agreements limiting  
29 access. Study results of this trial will be submitted for publication in a peer-reviewed journal.  
30 Individual level data will be made available after the findings of the study have been published.  
31 This data can be used for IPD meta-analyses or for further exploratory research. To obtain this data  
32 please contact Marissa Lassere.  
33 The trial is registered on ClinicalTrials. Gov - NCT03240783  
34  
35

### 36 **ACKNOWLEDGEMENTS**

37 We would like to thank Dr Derek Glenn, Head, Department of Radiology St George Hospital,  
38 Kogarah for assisting with the information regarding radiation safety, Dr Carl Bryant, Bryant  
39 Radiology, St George Private Hospital for undertaking the interventional procedures and Ms Sue  
40 Baker for developing the case report forms, setting up the database and assisting with the ethics  
41 application, and Ms Jenny Gu for editing the case report forms.  
42  
43

### 44 **COMPETING INTERESTS STATEMENT**

45 There are no competing interests.  
46

### 47 **AUTHORS' CONTRIBUTION**

48 Marissa Lassere conceived and designed the study. Marissa Lassere and Kent Johnson wrote the  
49 first draft of the protocol. Peter Smerdely, Grant Pickard and Jeanette Thom critically reviewed the  
50 protocol for important intellectual content and approved the final version.  
51

### 52 **FUNDING STATEMENT.**

53 This work was supported by The St George and Sutherland Medical Research Foundation,  
54 development grant number 2016/13. <http://www.stgeorgemrf.com.au/2015/11/02/our-2016-grants/>  
55  
56  
57  
58  
59

The sponsor had no role in the study design of this protocol and will have no role in the collection, management, analysis, and interpretation of data; writing of the report; and the decision to submit the report for publication, or authority over any of these activities.

## FIGURE LEGEND

### Figure 1. Study Flow Chart

## FULL REFERENCES

1. Koes BW, van Tulder MW, Peul WC. Diagnosis and treatment of sciatica. *BMJ* 2007;**334**(7607):1313-7 doi: 10.1136/bmj.39223.428495.BE.
2. Bogduk N. On the definitions and physiology of back pain, referred pain, and radicular pain. *Pain* 2009;**147**(1-3):17-9 doi: 10.1016/j.pain.2009.08.020.
3. Stafford MA, Peng P, Hill DA. Sciatica: a review of history, epidemiology, pathogenesis, and the role of epidural steroid injection in management. *Br J Anaesth* 2007;**99**(4):461-73 doi: 10.1093/bja/aem238.
4. Valat JP, Genevay S, Marty M, et al. Sciatica. *Best Pract Res Clin Rheumatol* 2010;**24**(2):241-52 doi: 10.1016/j.berh.2009.11.005.
5. Lin CW, Verwoerd AJ, Maher CG, et al. How is radiating leg pain defined in randomized controlled trials of conservative treatments in primary care? A systematic review. *Eur J Pain* 2014;**18**(4):455-64 doi: 10.1002/j.1532-2149.2013.00384.x.
6. Tarulli AW, Raynor EM. Lumbosacral radiculopathy. *Neurol Clin* 2007;**25**(2):387-405 doi: 10.1016/j.ncl.2007.01.008.
7. Henschke N, Maher CG, Refshauge KM, et al. Characteristics of patients with acute low back pain presenting to primary care in Australia. *Clin J Pain* 2009;**25**(1):5-11 doi: 10.1097/AJP.0b013e3181817a8d.
8. Weber H, Holme I, Amlie E. The natural course of acute sciatica with nerve root symptoms in a double-blind placebo-controlled trial evaluating the effect of piroxicam. *Spine (Phila Pa 1976)* 1993;**18**(11):1433-8
9. Rasmussen-Barr E, Held U, Grooten WJ, et al. Nonsteroidal Anti-inflammatory Drugs for Sciatica: An Updated Cochrane Review. *Spine (Phila Pa 1976)* 2017;**42**(8):586-94 doi: 10.1097/BRS.0000000000002092.
10. Rasmussen-Barr E, Held U, Grooten WJ, et al. Non-steroidal anti-inflammatory drugs for sciatica. *Cochrane Database of Systematic Reviews* 2016;**10**:CD012382
11. Rasmussen-Barr E, Held U, Grooten WJ, et al. Nonsteroidal Anti-inflammatory Drugs for Sciatica: An Updated Cochrane Review. *Spine (Phila Pa 1976)* 2017;**42**(8):586-94
12. Pinto RZ, Maher CG, Ferreira ML, et al. Drugs for relief of pain in patients with sciatica: systematic review and meta-analysis. *BMJ* 2012;**344**:e497 doi: 10.1136/bmj.e497.
13. Mathieson S, Maher CG, McLachlan AJ, et al. Trial of Pregabalin for Acute and Chronic Sciatica. *N Engl J Med* 2017;**376**(12):1111-20 doi: 10.1056/NEJMoa1614292.
14. Pinto RZ, Maher CG, Ferreira ML, et al. Epidural corticosteroid injections in the management of sciatica: a systematic review and meta-analysis. *Ann Intern Med* 2012;**157**(12):865-77
15. Chang-Chien GC, Knezevic NN, McCormick Z, et al. Transforaminal versus interlaminar approaches to epidural steroid injections: a systematic review of comparative studies for lumbosacral radicular pain. *Pain Physician* 2014;**17**(4):E509-24
16. Staal JB, de Bie R, de Vet HC, et al. Injection therapy for subacute and chronic low-back pain. *Cochrane Database of Systematic Reviews* 2008(3):CD001824

17. Bhatia A, Flamer D, Shah PS, et al. Transforaminal Epidural Steroid Injections for Treating Lumbosacral Radicular Pain from Herniated Intervertebral Discs: A Systematic Review and Meta-Analysis. *Anesth Analg* 2016;**122**(3):857-70 doi: 10.1213/ANE.0000000000001155.
18. Riew KD, Yin Y, Gilula L, et al. The effect of nerve-root injections on the need for operative treatment of lumbar radicular pain. A prospective, randomized, controlled, double-blind study. *J Bone Joint Surg Am* 2000;**82-A**(11):1589-93
19. Karppinen J, Malmivaara A, Kurunlahti M, et al. Periradicular infiltration for sciatica: a randomized controlled trial. *Spine (Phila Pa 1976)* 2001;**26**(9):1059-67
20. Tafazal S, Ng L, Chaudhary N, et al. Corticosteroids in peri-radicular infiltration for radicular pain: a randomised double blind controlled trial. One year results and subgroup analysis. *Eur Spine J* 2009;**18**(8):1220-5 doi: 10.1007/s00586-009-1000-2.
21. Ghahreman A, Ferch R, Bogduk N. The efficacy of transforaminal injection of steroids for the treatment of lumbar radicular pain. *Pain Med* 2010;**11**(8):1149-68 doi: 10.1111/j.1526-4637.2010.00908.x.
22. Cohen SP, White RL, Kurihara C, et al. Epidural steroids, etanercept, or saline in subacute sciatica: a multicenter, randomized trial. *Ann Intern Med* 2012;**156**(8):551-9 doi: 10.7326/0003-4819-156-8-201204170-00002.
23. Manchikanti L, Cash KA, Pampati V, et al. Transforaminal epidural injections in chronic lumbar disc herniation: a randomized, double-blind, active-control trial. *Pain Physician* 2014;**17**(4):E489-501
24. Epstein NE. The risks of epidural and transforaminal steroid injections in the Spine: Commentary and a comprehensive review of the literature. *Surg Neurol Int* 2013;**4**(Suppl 2):S74-93 doi: 10.4103/2152-7806.109446.
25. Manchikanti L, Candido KD, Singh V, et al. Epidural steroid warning controversy still dogging FDA. *Pain Physician* 2014;**17**(4):E451-74
26. Rathmell JP, Benzon HT, Dreyfuss P, et al. Safeguards to prevent neurologic complications after epidural steroid injections: consensus opinions from a multidisciplinary working group and national organizations. *Anesthesiology* 2015;**122**(5):974-84 doi: 10.1097/ALN.0000000000000614.
27. El-Yahouchi C, Geske JR, Carter RE, et al. The noninferiority of the nonparticulate steroid dexamethasone vs the particulate steroids betamethasone and triamcinolone in lumbar transforaminal epidural steroid injections. *Pain Med* 2013;**14**(11):1650-7 doi: 10.1111/pme.12214.
28. Kennedy DJ, Plastaras C, Casey E, et al. Comparative effectiveness of lumbar transforaminal epidural steroid injections with particulate versus nonparticulate corticosteroids for lumbar radicular pain due to intervertebral disc herniation: a prospective, randomized, double-blind trial. *Pain Med* 2014;**15**(4):548-55 doi: 10.1111/pme.12325.
29. Denis I, Claveau G, Filiatrault M, et al. Randomized Double-Blind Controlled Trial Comparing the Effectiveness of Lumbar Transforaminal Epidural Injections of Particulate and Nonparticulate Corticosteroids for Lumbosacral Radicular Pain. *Pain Med* 2015 doi: 10.1111/pme.12846.
30. Roncoroni C, Baillet A, Durand M, et al. Efficacy and tolerance of systemic steroids in sciatica: a systematic review and meta-analysis. *Rheumatology (Oxford)* 2011;**50**(9):1603-11 doi: 10.1093/rheumatology/ker151.
31. Balakrishnamoorthy R, Horgan I, Perez S, et al. Does a single dose of intravenous dexamethasone reduce Symptoms in Emergency department patients with low Back pain and RADiculopathy (SEBRA)? A double-blind randomised controlled trial. *Emerg Med J* 2015;**32**(7):525-30 doi: 10.1136/emered-2013-203490.
32. Goldberg H, Firtch W, Tyburski M, et al. Oral steroids for acute radiculopathy due to a herniated lumbar disk: a randomized clinical trial. *JAMA* 2015;**313**(19):1915-23 doi: 10.1001/jama.2015.4468.



- 1 33. Chou R, Hashimoto R, Friedly J, et al. Epidural Corticosteroid Injections for Radiculopathy and  
2 Spinal Stenosis: A Systematic Review and Meta-analysis. *Ann Intern Med* 2015;**163**(5):373-  
3 81 doi: 10.7326/M15-0934.
- 4 34. Chiarotto A, Deyo RA, Terwee CB, et al. Core outcome domains for clinical trials in non-  
5 specific low back pain. *Eur Spine J* 2015;**24**(6):1127-42 doi: 10.1007/s00586-015-3892-3.
- 6 35. Fairbank JC, Pynsent PB. The Oswestry Disability Index. *Spine (Phila Pa 1976)*  
7 2000;**25**(22):2940-52; discussion 52
- 8 36. Guzman JZ, Cutler HS, Connolly J, et al. Patient-Reported Outcome Instruments in Spine  
9 Surgery. *Spine (Phila Pa 1976)* 2016;**41**(5):429-37 doi: 10.1097/BRS.0000000000001211.
- 10 37. Williamson A, Hoggart B. Pain: a review of three commonly used pain rating scales. *J Clin*  
11 *Nurs* 2005;**14**(7):798-804 doi: 10.1111/j.1365-2702.2005.01121.x.
- 12 38. Shaygan M, Boger A, Kroner-Herwig B. Clinical features of chronic pain with neuropathic  
13 characteristics: a symptom-based assessment using the pain DETECT questionnaire. *Eur J*  
14 *Pain* 2013;**17**(10):1529-38 doi: 10.1002/j.1532-2149.2013.00322.x.
- 15 39. Ware JEa. SF-36 Health Survey : manual and interpretation guide. 1993, Boston: The Health  
16 Institute, New England Medical Cente. 1993
- 17 40. Fardon DF, Milette PC, Combined Task Forces of the North American Spine Society ASoSR, et  
18 al. Nomenclature and classification of lumbar disc pathology. Recommendations of the  
19 Combined task Forces of the North American Spine Society, American Society of Spine  
20 Radiology, and American Society of Neuroradiology. *Spine (Phila Pa 1976)*  
21 2001;**26**(5):E93-E113
- 22 41. Pfirrmann CW, Dora C, Schmid MR, et al. MR image-based grading of lumbar nerve root  
23 compromise due to disk herniation: reliability study with surgical correlation. *Radiology*  
24 2004;**230**(2):583-8 doi: 10.1148/radiol.2302021289.
- 25 42. Husereau D, Drummond M, Petrou S, et al. Consolidated Health Economic Evaluation  
26 Reporting Standards (CHEERS) statement. *BMJ* 2013;**346**:f1049 doi: 10.1136/bmj.f1049.
- 27 43. Dolan P. Modeling valuations for EuroQol health states. *Med Care* 1997;**35**(11):1095-108
- 28 44. Commonwealth of Australia as represented by the Department of Health. Guidelines for  
29 preparing a submission to the Pharmaceutical Benefits Advisory Committee (Version 5.0).  
30 <https://pbacpbsgovau/content/information/files/pbac-guidelines-version-5pdf> 2016
- 31 45. Manual of resource items and their associated unit costs. For use in submissions to the  
32 Pharmaceutical Benefits Advisory Committee involving economic analyses Version 5.0  
33 Secondary Manual of resource items and their associated unit costs. For use in submissions  
34 to the Pharmaceutical Benefits Advisory Committee involving economic analyses Version  
35 5.0 2016.
- 36 46. Koopmanschap MA. PRODISQ: a modular questionnaire on productivity and disease for  
37 economic evaluation studies. *Expert Rev Pharmacoecon Outcomes Res* 2005;**5**(1):23-8 doi:  
38 10.1586/14737167.5.1.23.
- 39 47. Leggett LE, Khadaroo RG, Holroyd-Leduc J, et al. Measuring Resource Utilization: A  
40 Systematic Review of Validated Self-Reported Questionnaires. *Medicine (Baltimore)*  
41 2016;**95**(10):e2759 doi: 10.1097/MD.0000000000002759.
- 42 48. Lauridsen HH, Hartvigsen J, Manniche C, et al. Responsiveness and minimal clinically  
43 important difference for pain and disability instruments in low back pain patients. *BMC*  
44 *Musculoskelet Disord* 2006;**7**:82 doi: 10.1186/1471-2474-7-82.
- 45 49. Ostelo RW, Deyo RA, Stratford P, et al. Interpreting change scores for pain and functional  
46 status in low back pain: towards international consensus regarding minimal important  
47 change. *Spine (Phila Pa 1976)* 2008;**33**(1):90-4 doi: 10.1097/BRS.0b013e31815e3a10.
- 48 50. Proschan MA, Waclawiw MA. Practical guidelines for multiplicity adjustment in clinical trials.  
49 *Control Clin Trials* 2000;**21**(6):527-39
- 50 51. Wason JM, Stecher L, Mander AP. Correcting for multiple-testing in multi-arm trials: is it  
51 necessary and is it done? *Trials* 2014;**15**:364 doi: 10.1186/1745-6215-15-364.
- 52  
53  
54  
55  
56  
57  
58  
59



- 1  
2 52. Bender R, Lange S. Adjusting for multiple testing--when and how? J Clin Epidemiol  
3 2001;**54**(4):343-9  
4 53. <http://www.consort-statement.org/>. Secondary <http://www.consort-statement.org/>.  
5 54. White IR, Horton NJ, Carpenter J, et al. Strategy for intention to treat analysis in randomised  
6 trials with missing outcome data. BMJ 2011;**342**:d40 doi: 10.1136/bmj.d40.  
7  
8  
9  
10  
11  
12  
13  
14  
15  
16  
17  
18  
19  
20  
21  
22  
23  
24  
25  
26  
27  
28  
29  
30  
31  
32  
33  
34  
35  
36  
37  
38  
39  
40  
41  
42  
43  
44  
45  
46  
47  
48  
49  
50  
51  
52  
53  
54  
55  
56  
57  
58  
59  
60



Figure 1. Study Flow Chart

171x184mm (300 x 300 DPI)



SPIRIT 2013 Checklist: Recommended items to address in a clinical trial protocol and related documents\*

| Section/item                      | Item No | Description                                                                                                                                                                                                                                                                              | Addressed on page number |
|-----------------------------------|---------|------------------------------------------------------------------------------------------------------------------------------------------------------------------------------------------------------------------------------------------------------------------------------------------|--------------------------|
| <b>Administrative information</b> |         |                                                                                                                                                                                                                                                                                          |                          |
| Title                             | 1       | Descriptive title identifying the study design, population, interventions, and, if applicable, trial acronym                                                                                                                                                                             | 1                        |
| Trial registration                | 2a      | Trial identifier and registry name. If not yet registered, name of intended registry                                                                                                                                                                                                     | 2                        |
|                                   | 2b      | All items from the World Health Organization Trial Registration Data Set                                                                                                                                                                                                                 |                          |
| Protocol version                  | 3       | Date and version identifier                                                                                                                                                                                                                                                              | 15                       |
| Funding                           | 4       | Sources and types of financial, material, and other support                                                                                                                                                                                                                              | 18                       |
| Roles and responsibilities        | 5a      | Names, affiliations, and roles of protocol contributors                                                                                                                                                                                                                                  | 1, 18                    |
|                                   | 5b      | Name and contact information for the trial sponsor                                                                                                                                                                                                                                       | 18                       |
|                                   | 5c      | Role of study sponsor and funders, if any, in study design; collection, management, analysis, and interpretation of data; writing of the report; and the decision to submit the report for publication, including whether they will have ultimate authority over any of these activities | 18                       |
|                                   | 5d      | Composition, roles, and responsibilities of the coordinating centre, steering committee, endpoint adjudication committee, data management team, and other individuals or groups overseeing the trial, if applicable (see Item 21a for data monitoring committee)                         | 16                       |

1  
2  
3  
4  
5  
6  
7  
8  
9  
10  
11  
12  
13  
14  
15  
16  
17  
18  
19  
20  
21  
22  
23  
24  
25  
26  
27  
28  
29  
30  
31  
32  
33  
34  
35  
36  
37  
38  
39  
40  
41  
42  
43  
44  
45  
46  
47

## Introduction

|                          |    |                                                                                                                                                                                                           |          |
|--------------------------|----|-----------------------------------------------------------------------------------------------------------------------------------------------------------------------------------------------------------|----------|
| Background and rationale | 6a | Description of research question and justification for undertaking the trial, including summary of relevant studies (published and unpublished) examining benefits and harms for each intervention        | 3-4      |
|                          | 6b | Explanation for choice of comparators                                                                                                                                                                     | 3-4, 7-8 |
| Objectives               | 7  | Specific objectives or hypotheses                                                                                                                                                                         | 5        |
| Trial design             | 8  | Description of trial design including type of trial (eg, parallel group, crossover, factorial, single group), allocation ratio, and framework (eg, superiority, equivalence, noninferiority, exploratory) | 7,12     |

## Methods: Participants, interventions, and outcomes

|                      |     |                                                                                                                                                                                                                                                                                                                                                                                |       |
|----------------------|-----|--------------------------------------------------------------------------------------------------------------------------------------------------------------------------------------------------------------------------------------------------------------------------------------------------------------------------------------------------------------------------------|-------|
| Study setting        | 9   | Description of study settings (eg, community clinic, academic hospital) and list of countries where data will be collected. Reference to where list of study sites can be obtained                                                                                                                                                                                             | 12,13 |
| Eligibility criteria | 10  | Inclusion and exclusion criteria for participants. If applicable, eligibility criteria for study centres and individuals who will perform the interventions (eg, surgeons, psychotherapists)                                                                                                                                                                                   | 6     |
| Interventions        | 11a | Interventions for each group with sufficient detail to allow replication, including how and when they will be administered                                                                                                                                                                                                                                                     | 7-8   |
|                      | 11b | Criteria for discontinuing or modifying allocated interventions for a given trial participant (eg, drug dose change in response to harms, participant request, or improving/worsening disease)                                                                                                                                                                                 | 17,18 |
|                      | 11c | Strategies to improve adherence to intervention protocols, and any procedures for monitoring adherence (eg, drug tablet return, laboratory tests)                                                                                                                                                                                                                              | 12,13 |
|                      | 11d | Relevant concomitant care and interventions that are permitted or prohibited during the trial                                                                                                                                                                                                                                                                                  | 7     |
| Outcomes             | 12  | Primary, secondary, and other outcomes, including the specific measurement variable (eg, systolic blood pressure), analysis metric (eg, change from baseline, final value, time to event), method of aggregation (eg, median, proportion), and time point for each outcome. Explanation of the clinical relevance of chosen efficacy and harm outcomes is strongly recommended | 9-10  |
| Participant timeline | 13  | Time schedule of enrolment, interventions (including any run-ins and washouts), assessments, and visits for participants. A schematic diagram is highly recommended (see Figure)                                                                                                                                                                                               | 11    |

|   |             |    |                                                                                                                                                                                       |       |
|---|-------------|----|---------------------------------------------------------------------------------------------------------------------------------------------------------------------------------------|-------|
| 1 |             |    |                                                                                                                                                                                       |       |
| 2 |             |    |                                                                                                                                                                                       |       |
| 3 | Sample size | 14 | Estimated number of participants needed to achieve study objectives and how it was determined, including clinical and statistical assumptions supporting any sample size calculations | 12    |
| 4 |             |    |                                                                                                                                                                                       |       |
| 5 | Recruitment | 15 | Strategies for achieving adequate participant enrolment to reach target sample size                                                                                                   | 12,13 |
| 6 |             |    |                                                                                                                                                                                       |       |
| 7 |             |    |                                                                                                                                                                                       |       |

### 8 **Methods: Assignment of interventions (for controlled trials)**

#### 9 Allocation:

|    |                                  |     |                                                                                                                                                                                                                                                                                                                                                          |       |
|----|----------------------------------|-----|----------------------------------------------------------------------------------------------------------------------------------------------------------------------------------------------------------------------------------------------------------------------------------------------------------------------------------------------------------|-------|
| 10 |                                  |     |                                                                                                                                                                                                                                                                                                                                                          |       |
| 11 |                                  |     |                                                                                                                                                                                                                                                                                                                                                          |       |
| 12 | Sequence generation              | 16a | Method of generating the allocation sequence (eg, computer-generated random numbers), and list of any factors for stratification. To reduce predictability of a random sequence, details of any planned restriction (eg, blocking) should be provided in a separate document that is unavailable to those who enrol participants or assign interventions | 14    |
| 13 |                                  |     |                                                                                                                                                                                                                                                                                                                                                          |       |
| 14 |                                  |     |                                                                                                                                                                                                                                                                                                                                                          |       |
| 15 |                                  |     |                                                                                                                                                                                                                                                                                                                                                          |       |
| 16 |                                  |     |                                                                                                                                                                                                                                                                                                                                                          |       |
| 17 | Allocation concealment mechanism | 16b | Mechanism of implementing the allocation sequence (eg, central telephone; sequentially numbered, opaque, sealed envelopes), describing any steps to conceal the sequence until interventions are assigned                                                                                                                                                | 12-14 |
| 18 |                                  |     |                                                                                                                                                                                                                                                                                                                                                          |       |
| 19 |                                  |     |                                                                                                                                                                                                                                                                                                                                                          |       |
| 20 |                                  |     |                                                                                                                                                                                                                                                                                                                                                          |       |
| 21 | Implementation                   | 16c | Who will generate the allocation sequence, who will enrol participants, and who will assign participants to interventions                                                                                                                                                                                                                                | 14    |
| 22 |                                  |     |                                                                                                                                                                                                                                                                                                                                                          |       |
| 23 |                                  |     |                                                                                                                                                                                                                                                                                                                                                          |       |
| 24 | Blinding (masking)               | 17a | Who will be blinded after assignment to interventions (eg, trial participants, care providers, outcome assessors, data analysts), and how                                                                                                                                                                                                                | 15    |
| 25 |                                  |     |                                                                                                                                                                                                                                                                                                                                                          |       |
| 26 |                                  |     |                                                                                                                                                                                                                                                                                                                                                          |       |
| 27 |                                  | 17b | If blinded, circumstances under which unblinding is permissible, and procedure for revealing a participant's allocated intervention during the trial                                                                                                                                                                                                     | 15    |
| 28 |                                  |     |                                                                                                                                                                                                                                                                                                                                                          |       |
| 29 |                                  |     |                                                                                                                                                                                                                                                                                                                                                          |       |
| 30 |                                  |     |                                                                                                                                                                                                                                                                                                                                                          |       |

### 31 **Methods: Data collection, management, and analysis**

|    |                         |     |                                                                                                                                                                                                                                                                                                                                                                                                              |            |
|----|-------------------------|-----|--------------------------------------------------------------------------------------------------------------------------------------------------------------------------------------------------------------------------------------------------------------------------------------------------------------------------------------------------------------------------------------------------------------|------------|
| 32 |                         |     |                                                                                                                                                                                                                                                                                                                                                                                                              |            |
| 33 | Data collection methods | 18a | Plans for assessment and collection of outcome, baseline, and other trial data, including any related processes to promote data quality (eg, duplicate measurements, training of assessors) and a description of study instruments (eg, questionnaires, laboratory tests) along with their reliability and validity, if known. Reference to where data collection forms can be found, if not in the protocol | 9,10,11,15 |
| 34 |                         |     |                                                                                                                                                                                                                                                                                                                                                                                                              |            |
| 35 |                         |     |                                                                                                                                                                                                                                                                                                                                                                                                              |            |
| 36 |                         |     |                                                                                                                                                                                                                                                                                                                                                                                                              |            |
| 37 |                         |     |                                                                                                                                                                                                                                                                                                                                                                                                              |            |
| 38 |                         | 18b | Plans to promote participant retention and complete follow-up, including list of any outcome data to be collected for participants who discontinue or deviate from intervention protocols                                                                                                                                                                                                                    | 13         |
| 39 |                         |     |                                                                                                                                                                                                                                                                                                                                                                                                              |            |
| 40 |                         |     |                                                                                                                                                                                                                                                                                                                                                                                                              |            |
| 41 |                         |     |                                                                                                                                                                                                                                                                                                                                                                                                              |            |
| 42 |                         |     |                                                                                                                                                                                                                                                                                                                                                                                                              |            |
| 43 |                         |     |                                                                                                                                                                                                                                                                                                                                                                                                              |            |
| 44 |                         |     |                                                                                                                                                                                                                                                                                                                                                                                                              |            |
| 45 |                         |     |                                                                                                                                                                                                                                                                                                                                                                                                              |            |
| 46 |                         |     |                                                                                                                                                                                                                                                                                                                                                                                                              |            |
| 47 |                         |     |                                                                                                                                                                                                                                                                                                                                                                                                              |            |

1  
2  
3  
4  
5  
6  
7  
8  
9  
10  
11  
12  
13  
14  
15  
16  
17  
18  
19  
20  
21  
22  
23  
24  
25  
26  
27  
28  
29  
30  
31  
32  
33  
34  
35  
36  
37  
38  
39  
40  
41  
42  
43  
44  
45  
46  
47

|                 |    |                                                                                                                                                                                                                                                                   |                  |
|-----------------|----|-------------------------------------------------------------------------------------------------------------------------------------------------------------------------------------------------------------------------------------------------------------------|------------------|
| Data management | 19 | Plans for data entry, coding, security, and storage, including any related processes to promote data quality (eg, double data entry; range checks for data values). Reference to where details of data management procedures can be found, if not in the protocol | In HREC protocol |
|-----------------|----|-------------------------------------------------------------------------------------------------------------------------------------------------------------------------------------------------------------------------------------------------------------------|------------------|

|                     |     |                                                                                                                                                                          |       |
|---------------------|-----|--------------------------------------------------------------------------------------------------------------------------------------------------------------------------|-------|
| Statistical methods | 20a | Statistical methods for analysing primary and secondary outcomes. Reference to where other details of the statistical analysis plan can be found, if not in the protocol | 15-16 |
|---------------------|-----|--------------------------------------------------------------------------------------------------------------------------------------------------------------------------|-------|

|  |     |                                                                          |       |
|--|-----|--------------------------------------------------------------------------|-------|
|  | 20b | Methods for any additional analyses (eg, subgroup and adjusted analyses) | 15-16 |
|--|-----|--------------------------------------------------------------------------|-------|

|  |     |                                                                                                                                                                                 |       |
|--|-----|---------------------------------------------------------------------------------------------------------------------------------------------------------------------------------|-------|
|  | 20c | Definition of analysis population relating to protocol non-adherence (eg, as randomised analysis), and any statistical methods to handle missing data (eg, multiple imputation) | 15-16 |
|--|-----|---------------------------------------------------------------------------------------------------------------------------------------------------------------------------------|-------|

**Methods: Monitoring**

|                 |     |                                                                                                                                                                                                                                                                                                                                       |       |
|-----------------|-----|---------------------------------------------------------------------------------------------------------------------------------------------------------------------------------------------------------------------------------------------------------------------------------------------------------------------------------------|-------|
| Data monitoring | 21a | Composition of data monitoring committee (DMC); summary of its role and reporting structure; statement of whether it is independent from the sponsor and competing interests; and reference to where further details about its charter can be found, if not in the protocol. Alternatively, an explanation of why a DMC is not needed | 16,17 |
|-----------------|-----|---------------------------------------------------------------------------------------------------------------------------------------------------------------------------------------------------------------------------------------------------------------------------------------------------------------------------------------|-------|

|  |     |                                                                                                                                                                         |       |
|--|-----|-------------------------------------------------------------------------------------------------------------------------------------------------------------------------|-------|
|  | 21b | Description of any interim analyses and stopping guidelines, including who will have access to these interim results and make the final decision to terminate the trial | 15-16 |
|--|-----|-------------------------------------------------------------------------------------------------------------------------------------------------------------------------|-------|

|       |    |                                                                                                                                                                                   |       |
|-------|----|-----------------------------------------------------------------------------------------------------------------------------------------------------------------------------------|-------|
| Harms | 22 | Plans for collecting, assessing, reporting, and managing solicited and spontaneously reported adverse events and other unintended effects of trial interventions or trial conduct | 10,17 |
|-------|----|-----------------------------------------------------------------------------------------------------------------------------------------------------------------------------------|-------|

|          |    |                                                                                                                                             |    |
|----------|----|---------------------------------------------------------------------------------------------------------------------------------------------|----|
| Auditing | 23 | Frequency and procedures for auditing trial conduct, if any, and whether the process will be independent from investigators and the sponsor | 18 |
|----------|----|---------------------------------------------------------------------------------------------------------------------------------------------|----|

**Ethics and dissemination**

|                          |    |                                                                                           |          |
|--------------------------|----|-------------------------------------------------------------------------------------------|----------|
| Research ethics approval | 24 | Plans for seeking research ethics committee/institutional review board (REC/IRB) approval | approved |
|--------------------------|----|-------------------------------------------------------------------------------------------|----------|

|                     |    |                                                                                                                                                                                                                                  |    |
|---------------------|----|----------------------------------------------------------------------------------------------------------------------------------------------------------------------------------------------------------------------------------|----|
| Protocol amendments | 25 | Plans for communicating important protocol modifications (eg, changes to eligibility criteria, outcomes, analyses) to relevant parties (eg, investigators, REC/IRBs, trial participants, trial registries, journals, regulators) | 16 |
|---------------------|----|----------------------------------------------------------------------------------------------------------------------------------------------------------------------------------------------------------------------------------|----|





|    |                               |     |                                                                                                                                                                                                                                                                                     |                                       |
|----|-------------------------------|-----|-------------------------------------------------------------------------------------------------------------------------------------------------------------------------------------------------------------------------------------------------------------------------------------|---------------------------------------|
| 1  |                               |     |                                                                                                                                                                                                                                                                                     |                                       |
| 2  |                               |     |                                                                                                                                                                                                                                                                                     |                                       |
| 3  | Consent or assent             | 26a | Who will obtain informed consent or assent from potential trial participants or authorised surrogates, and how (see Item 32)                                                                                                                                                        | 12,13                                 |
| 4  |                               |     |                                                                                                                                                                                                                                                                                     |                                       |
| 5  |                               |     |                                                                                                                                                                                                                                                                                     |                                       |
| 6  |                               | 26b | Additional consent provisions for collection and use of participant data and biological specimens in ancillary studies, if applicable                                                                                                                                               | NA                                    |
| 7  |                               |     |                                                                                                                                                                                                                                                                                     |                                       |
| 8  | Confidentiality               | 27  | How personal information about potential and enrolled participants will be collected, shared, and maintained in order to protect confidentiality before, during, and after the trial                                                                                                | IN HREC protocol                      |
| 9  |                               |     |                                                                                                                                                                                                                                                                                     |                                       |
| 10 |                               |     |                                                                                                                                                                                                                                                                                     |                                       |
| 11 | Declaration of interests      | 28  | Financial and other competing interests for principal investigators for the overall trial and each study site                                                                                                                                                                       | 18                                    |
| 12 |                               |     |                                                                                                                                                                                                                                                                                     |                                       |
| 13 |                               |     |                                                                                                                                                                                                                                                                                     |                                       |
| 14 | Access to data                | 29  | Statement of who will have access to the final trial dataset, and disclosure of contractual agreements that limit such access for investigators                                                                                                                                     | 18                                    |
| 15 |                               |     |                                                                                                                                                                                                                                                                                     |                                       |
| 16 |                               |     |                                                                                                                                                                                                                                                                                     |                                       |
| 17 | Ancillary and post-trial care | 30  | Provisions, if any, for ancillary and post-trial care, and for compensation to those who suffer harm from trial participation                                                                                                                                                       | In patient consent/HREC documentation |
| 18 |                               |     |                                                                                                                                                                                                                                                                                     |                                       |
| 19 |                               |     |                                                                                                                                                                                                                                                                                     |                                       |
| 20 |                               |     |                                                                                                                                                                                                                                                                                     |                                       |
| 21 | Dissemination policy          | 31a | Plans for investigators and sponsor to communicate trial results to participants, healthcare professionals, the public, and other relevant groups (eg, via publication, reporting in results databases, or other data sharing arrangements), including any publication restrictions | 18                                    |
| 22 |                               |     |                                                                                                                                                                                                                                                                                     |                                       |
| 23 |                               |     |                                                                                                                                                                                                                                                                                     |                                       |
| 24 |                               |     |                                                                                                                                                                                                                                                                                     |                                       |
| 25 |                               |     |                                                                                                                                                                                                                                                                                     |                                       |
| 26 |                               | 31b | Authorship eligibility guidelines and any intended use of professional writers                                                                                                                                                                                                      | None used                             |
| 27 |                               |     |                                                                                                                                                                                                                                                                                     |                                       |
| 28 |                               | 31c | Plans, if any, for granting public access to the full protocol, participant-level dataset, and statistical code                                                                                                                                                                     | 18                                    |
| 29 |                               |     |                                                                                                                                                                                                                                                                                     |                                       |
| 30 | <b>Appendices</b>             |     |                                                                                                                                                                                                                                                                                     |                                       |
| 31 |                               |     |                                                                                                                                                                                                                                                                                     |                                       |
| 32 | Informed consent materials    | 32  | Model consent form and other related documentation given to participants and authorised surrogates                                                                                                                                                                                  | HREC                                  |
| 33 |                               |     |                                                                                                                                                                                                                                                                                     |                                       |
| 34 |                               |     |                                                                                                                                                                                                                                                                                     |                                       |
| 35 | Biological specimens          | 33  | Plans for collection, laboratory evaluation, and storage of biological specimens for genetic or molecular analysis in the current trial and for future use in ancillary studies, if applicable                                                                                      | NA                                    |
| 36 |                               |     |                                                                                                                                                                                                                                                                                     |                                       |
| 37 |                               |     |                                                                                                                                                                                                                                                                                     |                                       |

\*It is strongly recommended that this checklist be read in conjunction with the SPIRIT 2013 Explanation & Elaboration for important clarification on the items. Amendments to the protocol should be tracked and dated. The SPIRIT checklist is copyrighted by the SPIRIT Group under the Creative Commons "[Attribution-NonCommercial-NoDerivs 3.0 Unported](https://creativecommons.org/licenses/by-nc-nd/3.0/)" license.
